# Supplementary material for: Single cell analysis of endometriosis reveals a coordinated transcriptional program driving immunotolerance and angiogenesis across eutopic and ectopic tissues.
Source: Research Square preprint supplement (doi:10.21203/rs.3.rs-745435/v1), 2021-08-09
Supplement: Supplementary file 1 [file 1cc5b850d81dc16f1112b308.xlsx]

## Sheet: major cell type
Supplementary Table 2. Markers genes expressed by each cell subpopulation
cluster	gene	score	logfc	pval	pval_fdr	in_group_fraction	out_group_fraction
epithelial	EPCAM	193.435	7.59215	0	0	0.918021	0.0458171
epithelial	CLDN3	186.445	7.99924	0	0	0.884522	0.0192561
epithelial	SMIM22	182.437	7.90674	0	0	0.865478	0.0123149
epithelial	MUC1	179.724	6.21846	0	0	0.865425	0.0495396
epithelial	C2orf88	174.644	6.41365	0	0	0.839207	0.0367908
epithelial	CLDN7	174.56	5.84118	0	0	0.84348	0.0494556
epithelial	LINC01541	171.069	7.10292	0	0	0.81916	0.0319768
epithelial	HOMER2	169.809	6.11268	0	0	0.819213	0.0342999
epithelial	SLC34A2	169.278	7.7319	0	0	0.804969	0.0104117
epithelial	UCA1	167.622	7.59033	0	0	0.79827	0.0160094
epithelial	DLX5	167.604	6.2298	0	0	0.806235	0.0322007
epithelial	PAX8	167.47	6.21072	0	0	0.806658	0.0271068
epithelial	FXYD3	165.648	7.57494	0	0	0.78793	0.00985194
epithelial	SERINC2	164.165	5.46515	0	0	0.798744	0.0428224
epithelial	CP	163.993	6.82716	0	0	0.788352	0.0271768
epithelial	EHF	163.466	7.37115	0	0	0.778171	0.0111674
epithelial	GABRP	162.349	6.89326	0	0	0.779226	0.0269949
epithelial	CLDN4	162.068	7.13531	0	0	0.773739	0.0148059
epithelial	C19orf33	161.956	6.76087	0	0	0.775216	0.0154776
epithelial	RAB25	160.693	7.76214	0	0	0.762714	0.00587758
epithelial	MAL2	159.59	7.33398	0	0	0.759179	0.00748692
epithelial	ELF3	158.321	7.1659	0	0	0.756858	0.0153657
epithelial	PIGR	157.946	6.51856	0	0	0.764666	0.0345937
epithelial	KRTCAP3	155.686	5.74969	0	0	0.753112	0.0202776
epithelial	AGR2	154.213	6.89414	0	0	0.739766	0.021915
epithelial	CXADR	153.668	5.47787	0	0	0.747151	0.0253296
epithelial	LINC01320	153.564	7.81516	0	0	0.730587	0.00920821
epithelial	TSPAN1	151.226	6.24677	0	0	0.729321	0.0229785
epithelial	UGT2B7	150.527	7.54904	0	0	0.71571	0.0070391
epithelial	HOXB6	148.135	5.19414	0	0	0.725628	0.0293459
epithelial	RHEX	147.912	5.47187	0	0	0.720089	0.0270369
epithelial	DSG2	145.908	4.46542	0	0	0.732275	0.0457891
epithelial	DDR1	145.762	4.55767	0	0	0.728318	0.0439839
epithelial	IL20RA	145.131	6.69813	0	0	0.695083	0.0138263
epithelial	TACSTD2	144.357	5.99924	0	0	0.702627	0.0322287
epithelial	CDH1	143.822	7.12124	0	0	0.684849	0.00691315
epithelial	KRT7	143.296	6.02452	0	0	0.696982	0.0357833
epithelial	TMC4	142.373	5.54715	0	0	0.690283	0.01948
epithelial	AP1M2	141.651	7.65495	0	0	0.672135	0.0041283
epithelial	PRR15	141.405	6.35669	0	0	0.679152	0.0165412
epithelial	PLLP	141.277	4.94195	0	0	0.69656	0.0335302
epithelial	EYA2	141.267	6.73924	0	0	0.67472	0.00925019
epithelial	SCNN1A	140.624	6.147	0	0	0.675934	0.0140642
epithelial	DEFB1	139.966	6.84266	0	0	0.67662	0.0260713
epithelial	KLF5	139.513	5.73795	0	0	0.674509	0.0168211
epithelial	MUC16	137.798	6.35392	0	0	0.662956	0.0162333
epithelial	DCDC2	135.498	7.24374	0	0	0.645495	0.00779479
epithelial	SHROOM3	133.584	5.25227	0	0	0.653197	0.0282684
epithelial	ARHGEF35	133.335	4.65954	0	0	0.662534	0.0379804
epithelial	STXBP6	132.669	4.57896	0	0	0.662851	0.038932
epithelial	PAX2	132.616	7.45834	0	0	0.630355	0.00530381
epithelial	SPINT1-AS1	128.583	5.66544	0	0	0.621386	0.0157855
epithelial	HOOK1	127.731	5.16885	0	0	0.623338	0.0180806
epithelial	ERBB3	127.121	5.47255	0	0	0.616639	0.0164572
epithelial	ANXA3	125.703	5.19953	0	0	0.614265	0.0206415
epithelial	TFPI2	125.308	4.97798	0	0	0.622652	0.0381763
epithelial	SLC44A4	122.785	5.39113	0	0	0.598069	0.0192561
epithelial	MYH14	121.172	6.5418	0	0	0.579236	0.00745893
epithelial	DLX6	119.343	7.19461	0	0	0.567367	0.00410031
epithelial	GMPR	118.155	4.08205	0	0	0.602553	0.0468667
epithelial	PTPN3	116.522	5.20875	0	0	0.565995	0.0143861
epithelial	CRB3	116.386	7.06529	0	0	0.553281	0.00382043
epithelial	LCN2	116.234	5.52235	0	0	0.573855	0.031515
epithelial	ENPP3	114.543	6.15736	0	0	0.552332	0.0140922
epithelial	KIF12	114.132	6.49429	0	0	0.545843	0.00730499
epithelial	KLK11	113.305	7.09098	0	0	0.539882	0.00563968
epithelial	LINC01480	112.938	5.4745	0	0	0.556499	0.0322987
epithelial	TOM1L1	112.692	4.1245	0	0	0.568791	0.036497
epithelial	PPP1R9A	111.415	4.30516	0	0	0.554231	0.0231745
epithelial	FGFR2	111.392	5.7293	0	0	0.537297	0.0116012
epithelial	HOXB8	111.022	5.16587	0	0	0.540568	0.0147219
epithelial	LGR4	110.77	4.64347	0	0	0.548639	0.0255675
epithelial	PKP2	109.996	4.04193	0	0	0.556921	0.0350136
epithelial	KIAA1324	109.803	5.66318	0	0	0.534712	0.0215511
epithelial	IDO1	109.482	5.6938	0	0	0.531863	0.017101
epithelial	VSIG2	108.913	5.79318	0	0	0.524636	0.0102578
epithelial	HOXB5	107.356	5.13455	0	0	0.522895	0.0150438
epithelial	LAD1	107.053	7.08181	0	0	0.508493	0.00305074
epithelial	PSAT1	105.817	5.50801	0	0	0.517092	0.0227406
epithelial	DLX6-AS1	105.071	6.90624	0	0	0.500633	0.00502393
epithelial	AGR3	104.977	6.72028	0	0	0.50306	0.00870441
epithelial	HGD	104.623	6.72496	0	0	0.499103	0.0058216
epithelial	CA12	104.14	4.41978	0	0	0.523053	0.0342019
epithelial	FAM110C	103.929	5.51895	0	0	0.503429	0.0123429
epithelial	SH2D4A	103.777	4.41938	0	0	0.516354	0.0250777
stromal	PDGFRB	198.564	6.26995	0	0	0.833452	0.0335482
stromal	PRRX1	192.331	6.08319	0	0	0.805785	0.0384861
stromal	ISLR	191.075	6.42458	0	0	0.798927	0.0351723
stromal	PDGFRA	187.716	6.32789	0	0	0.785857	0.0428991
stromal	MXRA8	183.937	6.01907	0	0	0.771633	0.0357301
stromal	TBX3	172.553	5.78822	0	0	0.728791	0.0347786
stromal	EMILIN1	172.455	5.93464	0	0	0.724751	0.0296274
stromal	CDH11	170.048	5.14388	0	0	0.728825	0.0480667
stromal	COL5A2	169.227	5.80894	0	0	0.715042	0.0408157
stromal	MEG3	168.041	5.56062	0	0	0.717453	0.0495923
stromal	CPXM1	165.106	5.36293	0	0	0.703839	0.0473613
stromal	CARMN	164.221	6.47428	0	0	0.687239	0.022278
stromal	RORB	164.019	6.90734	0	0	0.683539	0.0224092
stromal	OSR2	163.468	6.55867	0	0	0.68269	0.0240661
stromal	CD248	162.185	6.46848	0	0	0.677021	0.0201289
stromal	COL5A1	161.842	5.42187	0	0	0.688801	0.0463605
stromal	ADRA2C	160.522	6.04654	0	0	0.675833	0.0344669
stromal	CTSK	157.897	5.18705	0	0	0.674984	0.0416195
stromal	ECM1	154.704	5.61023	0	0	0.659368	0.045081
stromal	SYNPO2	153.821	6.25962	0	0	0.643548	0.0194891
stromal	HAND2	149.679	6.47393	0	0	0.624979	0.0189314
stromal	HAND2-AS1	149.405	5.79961	0	0	0.629664	0.0261824
stromal	NR2F2-AS1	143.454	5.02901	0	0	0.61398	0.0326132
stromal	COL14A1	141.018	6.17596	0	0	0.592627	0.0217366
stromal	DDR2	140.936	4.80829	0	0	0.607869	0.0405696
stromal	MFAP4	137.7	5.98614	0	0	0.579285	0.0196204
stromal	EDNRA	137.351	6.92583	0	0	0.569848	0.0100891
stromal	PCDH18	136.882	6.44149	0	0	0.570221	0.0126319
stromal	TWIST1	136.621	5.47952	0	0	0.583223	0.0359762
stromal	FXYD1	135.721	4.61334	0	0	0.593407	0.0430303
stromal	CLMP	135.317	5.99912	0	0	0.566962	0.015716
stromal	ALDH1A2	132.835	4.90184	0	0	0.573107	0.0385682
stromal	TWIST2	132.311	6.08606	0	0	0.553383	0.0147481
stromal	PAMR1	128.676	5.98673	0	0	0.540856	0.0186033
stromal	F10	128.559	7.94867	0	0	0.529891	0.00438014
stromal	SFRP1	127.689	5.22878	0	0	0.551108	0.0392244
stromal	HOXA11	125.765	6.55984	0	0	0.523645	0.0106797
stromal	MME	124.802	5.12839	0	0	0.535628	0.0318257
stromal	TMEM45A	122.547	5.02365	0	0	0.528635	0.0386666
stromal	APOD	120.584	5.03698	0	0	0.517738	0.0267074
stromal	LMOD1	119.004	6.69238	0	0	0.49523	0.00964614
stromal	HSPB6	118.566	6.51864	0	0	0.494551	0.0121397
stromal	DNM3OS	117.53	4.56725	0	0	0.510337	0.0319077
stromal	WNT2	116.987	6.82292	0	0	0.485691	0.00757911
stromal	DIO2	116.627	5.32461	0	0	0.50813	0.0444248
stromal	RCN3	113.326	4.05933	0	0	0.504702	0.0489525
stromal	LAMA2	111.79	4.72148	0	0	0.483586	0.0302672
stromal	WT1	111.781	4.76071	0	0	0.479818	0.0230326
stromal	PLAC9	108.786	4.53905	0	0	0.478189	0.0364683
stromal	MEIS3	106.828	5.79168	0	0	0.447568	0.0108765
stromal	LAMC3	106.627	6.21107	0	0	0.445565	0.0101547
stromal	WNT4	105.682	5.76454	0	0	0.445701	0.0161261
stromal	PRLR	105.285	5.37091	0	0	0.44862	0.0222124
endothelial	VWF	143.17	9.04482	0	0	0.942429	0.0278253
endothelial	EMCN	142.062	9.29829	0	0	0.934121	0.00979626
endothelial	CLEC14A	139.04	9.39385	0	0	0.914463	0.00931988
endothelial	ECSCR	138.61	9.69538	0	0	0.910952	0.00591196
endothelial	ADGRL4	135.19	9.39353	0	0	0.889071	0.00813505
endothelial	SOX18	129.609	7.57637	0	0	0.858062	0.0315508
endothelial	CD34	126.053	6.35291	0	0	0.843201	0.0414692
endothelial	PTPRB	119.692	7.49925	0	0	0.792418	0.0222553
endothelial	CXorf36	118.764	9.17149	0	0	0.781535	0.00493477
endothelial	CLDN5	118.251	8.61342	0	0	0.780833	0.0118606
endothelial	PCAT19	117.642	5.93781	0	0	0.792769	0.0339327
endothelial	ACKR1	117.464	9.06792	0	0	0.776972	0.021327
endothelial	NRN1	117.388	7.77248	0	0	0.776504	0.0147188
endothelial	ESAM	114.862	5.74658	0	0	0.776738	0.0373284
endothelial	MMRN2	114.729	8.25415	0	0	0.756611	0.00813505
endothelial	TSPAN7	113.908	6.60044	0	0	0.759888	0.0342258
endothelial	AQP1	113.874	7.97528	0	0	0.75626	0.0280696
endothelial	CDH5	110.683	8.35797	0	0	0.729815	0.0077686
endothelial	FLT1	109.441	6.52938	0	0	0.730985	0.0231226
endothelial	CYYR1	106.889	5.59822	0	0	0.721624	0.0489446
endothelial	PLVAP	106.419	8.63413	0	0	0.701849	0.0080129
endothelial	ROBO4	104.207	8.17928	0	0	0.687456	0.00688914
endothelial	FAM110D	103.219	8.72716	0	0	0.680435	0.00610739
endothelial	TM4SF18	102.695	9.13591	0	0	0.676223	0.00422632
endothelial	CCL14	98.2065	10.3728	0	0	0.645448	0.00166121
endothelial	TIE1	94.4435	6.86865	0	0	0.628247	0.0129599
endothelial	MYCT1	92.9377	9.11848	0	0	0.611631	0.00261396
endothelial	ERG	90.8199	6.86438	0	0	0.603674	0.0125324
endothelial	MMRN1	88.1504	7.90195	0	0	0.583314	0.0070235
endothelial	ADCY4	87.8808	5.867	0	0	0.592324	0.0248815
endothelial	KANK3	86.674	5.45077	0	0	0.587994	0.0243929
endothelial	SELP	84.3111	8.41589	0	0	0.55605	0.00399423
endothelial	ZNF385D	81.9768	5.90121	0	0	0.552656	0.0221088
endothelial	TMEM88	79.1094	6.62663	0	0	0.528434	0.0154761
endothelial	IL3RA	76.836	4.64337	0	0	0.532998	0.0365466
endothelial	MALL	76.6378	5.72921	0	0	0.51919	0.0262251
endothelial	SHANK3	75.6731	5.98113	0	0	0.509712	0.0212659
endothelial	CPXM2	75.0262	6.09386	0	0	0.504095	0.0165266
endothelial	ADGRF5	74.0273	4.72453	0	0	0.51252	0.0278619
endothelial	ABCG2	73.8929	4.9287	0	0	0.513691	0.0452436
endothelial	PCDH17	73.0234	7.27157	0	0	0.484788	0.0075976
endothelial	SHE	71.6171	6.27202	0	0	0.478821	0.0117873
endothelial	TEK	71.3341	5.32434	0	0	0.485724	0.0245151
endothelial	ZNF521	69.5027	4.40486	0	0	0.488533	0.0433014
endothelial	S1PR1	68.3656	4.10918	0	0	0.485607	0.0383056
endothelial	SPNS2	67.8564	6.42821	0	0	0.453194	0.0104559
endothelial	APLNR	67.2388	8.59722	0	0	0.443248	0.00257732
endothelial	SCARF1	66.3289	5.04142	0	0	0.454716	0.0256144
endothelial	MEOX1	64.5419	7.27294	0	0	0.427451	0.00438511
endothelial	TMEM255B	61.8514	4.96102	0	0	0.426398	0.0276421
endothelial	FGD5	61.576	4.61368	0	0	0.430494	0.0376582
endothelial	FOXC1	60.6281	3.92514	0	0	0.437632	0.0455978
myeloid	AIF1	162.133	8.1414	0	0	0.948546	0.0473359
myeloid	SPI1	154.244	7.67038	0	0	0.903781	0.0209596
myeloid	CYBB	154.163	7.64713	0	0	0.905654	0.0271591
myeloid	MS4A6A	145.759	8.14227	0	0	0.85527	0.0192929
myeloid	MNDA	143.709	7.35228	0	0	0.84876	0.0259343
myeloid	CLEC7A	141.224	7.04221	0	0	0.832977	0.0184596
myeloid	FCGR2A	140.476	6.68364	0	0	0.831639	0.0317551
myeloid	MARCH1	138.601	5.94159	0	0	0.831461	0.027399
myeloid	NCF2	136.686	7.5805	0	0	0.803192	0.0138636
myeloid	MS4A7	136.276	8.04773	0	0	0.799893	0.0115783
myeloid	IGSF6	135.781	6.90883	0	0	0.802122	0.0284343
myeloid	MPEG1	135.439	7.31504	0	0	0.798288	0.0133965
myeloid	CSF1R	131.927	8.35976	0	0	0.772606	0.00848485
myeloid	TBXAS1	127.308	5.65774	0	0	0.764312	0.030303
myeloid	HCK	126.412	7.71252	0	0	0.741751	0.00760101
myeloid	CSTA	122.761	7.34829	0	0	0.722846	0.0130303
myeloid	RNASE6	122.006	6.06807	0	0	0.728286	0.0222096
myeloid	LILRB2	118.893	7.92449	0	0	0.697253	0.0067803
myeloid	SLC7A7	115.38	5.39829	0	0	0.696808	0.0440278
myeloid	CD86	114.728	7.605	0	0	0.673355	0.00597222
myeloid	TLR2	114.031	6.4964	0	0	0.676654	0.0226768
myeloid	LY86	113.506	5.99219	0	0	0.676208	0.0133333
myeloid	LILRB3	111.83	6.99665	0	0	0.659622	0.0123611
myeloid	PTAFR	111.47	5.70141	0	0	0.668629	0.0261869
myeloid	LRRC25	111.412	7.64471	0	0	0.653647	0.00518939
myeloid	PILRA	110.425	6.12051	0	0	0.658017	0.0269192
myeloid	CD163	110.007	7.5334	0	0	0.648921	0.0141162
myeloid	ADAP2	108.861	5.98094	0	0	0.650169	0.022399
myeloid	FPR1	108.066	8.83505	0	0	0.6318	0.00301768
myeloid	CLEC12A	107.883	5.72684	0	0	0.65124	0.0309722
myeloid	SLC11A1	107.404	5.98552	0	0	0.648208	0.0470328
myeloid	ITGAM	107.225	4.79127	0	0	0.659622	0.0354924
myeloid	C5AR1	104.648	6.99381	0	0	0.619404	0.0181187
myeloid	CSF2RA	104.13	5.76876	0	0	0.62422	0.0276263
myeloid	SCIMP	103.69	5.29205	0	0	0.624933	0.0212753
myeloid	C3AR1	103.351	5.45108	0	0	0.623863	0.0248106
myeloid	FCN1	103.159	8.38227	0	0	0.60799	0.015303
myeloid	LILRB1	101.418	5.02501	0	0	0.616997	0.0253409
myeloid	AC020656.1	99.9603	6.51388	0	0	0.598805	0.0264268
myeloid	TFEC	99.8716	6.93948	0	0	0.588283	0.00695707
myeloid	P2RY13	98.9548	8.16679	0	0	0.579543	0.00395202
myeloid	FGD2	98.9336	5.4351	0	0	0.594525	0.0182576
myeloid	CFP	98.7109	7.16576	0	0	0.582129	0.0112753
myeloid	CD33	97.8292	6.61229	0	0	0.577849	0.00917929
myeloid	CCR1	97.3067	4.40036	0	0	0.607277	0.0397348
myeloid	NCF4	96.6364	4.14012	0	0	0.608347	0.0423485
myeloid	BTK	95.687	5.39268	0	0	0.573836	0.0142424
myeloid	PIK3AP1	95.1626	3.95571	0	0	0.605047	0.0460606
myeloid	CLEC4A	93.7765	6.33958	0	0	0.555645	0.0113005
myeloid	IFI30	91.7713	6.58408	0	0	0.542804	0.00978535
myeloid	LILRB4	91.7532	7.04715	0	0	0.539772	0.00546717
myeloid	HMOX1	91.3132	4.94399	0	0	0.567505	0.0472475
myeloid	RGS18	91.0866	6.34742	0	0	0.538969	0.00765152
myeloid	GAPT	90.5383	5.30716	0	0	0.545122	0.0158712
lymphocytes	CD3E	167.299	8.42143	0	0	0.752118	0.0142663
lymphocytes	TRBC2	157.756	7.2186	0	0	0.714558	0.0254305
lymphocytes	CD7	153.777	7.36091	0	0	0.698745	0.0327027
lymphocytes	CD2	153.023	8.03663	0	0	0.690816	0.0186413
lymphocytes	GZMA	152.791	8.02167	0	0	0.694622	0.034839
lymphocytes	CD247	143.003	7.9498	0	0	0.644466	0.0121154
lymphocytes	CST7	137.009	6.51444	0	0	0.628109	0.0321906
lymphocytes	TRAC	134.416	7.77978	0	0	0.608083	0.0160221
lymphocytes	IKZF3	131.936	6.7906	0	0	0.601241	0.0246404
lymphocytes	CTSW	131.79	7.23395	0	0	0.60029	0.0248306
lymphocytes	LCK	128.693	7.75265	0	0	0.580626	0.0113399
lymphocytes	CD96	125.808	7.29946	0	0	0.569933	0.0159051
lymphocytes	CD3D	123.229	8.24961	0	0	0.55625	0.0113399
lymphocytes	CCL4	123.147	6.33887	0	0	0.571972	0.0393018
lymphocytes	CD69	123.085	6.11596	0	0	0.56794	0.0308298
lymphocytes	GZMM	120.293	7.55708	0	0	0.544198	0.0128909
lymphocytes	PRF1	119.197	7.77506	0	0	0.539985	0.0141492
lymphocytes	IL2RB	113.812	7.1122	0	0	0.519143	0.0195338
lymphocytes	CD3G	113.296	8.70426	0	0	0.509628	0.00604305
lymphocytes	TRBC1	111.318	7.88151	0	0	0.503557	0.0109448
lymphocytes	SAMD3	106.978	6.40288	0	0	0.490599	0.0224749
lymphocytes	KLRB1	105.113	7.8564	0	0	0.476961	0.0127299
lymphocytes	KLRD1	100.403	6.82675	0	0	0.464954	0.0290739
lymphocytes	RHOH	95.9041	5.12459	0	0	0.450365	0.0325125
lymphocytes	PYHIN1	94.2141	7.43108	0	0	0.426533	0.00863293
lymphocytes	SPOCK2	93.4322	4.6836	0	0	0.449594	0.0484322
lymphocytes	MATK	89.6347	6.2004	0	0	0.411671	0.0163001
lymphocytes	TXK	87.6424	6.29981	0	0	0.404966	0.0211287
lymphocytes	GZMB	86.678	6.22962	0	0	0.402655	0.0216408
lymphocytes	GZMK	84.669	7.81296	0	0	0.384894	0.00993518
lymphocytes	CD27	82.6056	7.704	0	0	0.373522	0.00635032
lymphocytes	XCL2	82.036	8.30366	0	0	0.369671	0.00440426
lymphocytes	ZAP70	81.9379	7.03485	0	0	0.371664	0.00791595
lymphocytes	TRG-AS1	81.1002	5.45003	0	0	0.380182	0.0262499
lymphocytes	STAT4	81.047	6.21435	0	0	0.371845	0.0139005
lymphocytes	IL7R	79.6804	5.33105	0	0	0.383444	0.0384385
lymphocytes	LINC01871	78.7782	7.44337	0	0	0.357075	0.00724288
lymphocytes	LINC00861	78.7404	7.96935	0	0	0.354945	0.00425793
lymphocytes	MYBL1	73.5788	6.07756	0	0	0.341444	0.0181584
lymphocytes	TRDC	73.3786	6.70283	0	0	0.338725	0.0156271
lymphocytes	ITK	73.2596	7.61935	0	0	0.33066	0.00441889
lymphocytes	AC243960.1	71.9521	5.69742	0	0	0.333469	0.0159343
lymphocytes	BCL11B	71.7191	7.63785	0	0	0.323909	0.00457984
lymphocytes	SLFN12L	71.6141	6.01862	0	0	0.329165	0.0121885
lymphocytes	KLRC1	71.3841	7.38074	0	0	0.32622	0.0102425
lymphocytes	GPR171	71.3403	6.02719	0	0	0.329482	0.0147491
lymphocytes	GZMH	71.0719	7.96799	0	0	0.321327	0.00504807
lymphocytes	PTGDR	70.99	5.52999	0	0	0.330071	0.0168415
lymphocytes	GPR174	70.5092	7.34892	0	0	0.318699	0.00471153
lymphocytes	CD8A	68.7645	7.84491	0	0	0.311223	0.0053846
lymphocytes	SH2D2A	62.0017	5.07325	0	0	0.295592	0.0251086

## Sheet: myeloid
Supplementary Table 2. Markers genes expressed by each cell subpopulation
cluster	gene	score	logfc	pval	pval_fdr	in_group_fraction	out_group_fraction
basophils	MS4A2	8.92875	7.09957	4.30844e-19	8.64466e-17	0.8	0.0308999
basophils	GATA2	8.90673	8.15028	5.25606e-19	1.04484e-16	0.777778	0.0316227
basophils	CLC	8.50179	15.7523	1.86682e-17	2.90426e-15	0.733333	0.000361402
basophils	HDC	8.37818	7.49868	5.37536e-17	7.59234e-15	0.733333	0.0240332
basophils	AKAP12	7.86341	7.76805	3.73821e-15	3.66464e-13	0.688889	0.029906
basophils	MS4A3	7.72329	11.8983	1.13369e-14	1.00993e-12	0.666667	0.00171666
basophils	ITGB8	7.29821	7.46191	2.91612e-13	1.98121e-11	0.644444	0.0414709
basophils	NLK	7.0615	5.24492	1.64712e-12	9.71485e-11	0.666667	0.172208
basophils	CACNG8	6.93975	10.5019	3.92802e-12	2.16232e-10	0.6	0.00370437
basophils	SLC45A3	6.49568	6.26132	8.26593e-11	3.47963e-09	0.577778	0.0340622
basophils	IL3RA	6.2494	4.66892	4.12033e-10	1.50186e-08	0.6	0.14438
basophils	ETS1	6.13349	6.02159	8.59728e-10	2.92049e-08	0.555556	0.0590893
basophils	GCSAML	5.56422	6.70368	2.63327e-08	6.46839e-07	0.488889	0.015721
basophils	CCR3	5.3567	8.54696	8.4755e-08	1.86435e-06	0.466667	0.00867365
basophils	NFE2	4.92811	3.58448	8.30267e-07	1.51316e-05	0.511111	0.170672
basophils	CPA3	4.7242	4.2745	2.31018e-06	3.72072e-05	0.444444	0.0270148
basophils	IL5RA	4.33885	7.80877	1.43231e-05	0.000193519	0.377778	0.00551138
basophils	HPGD	4.33431	4.00933	1.46218e-05	0.000197183	0.422222	0.0572823
basophils	TTLL7	4.2326	6.58434	2.31006e-05	0.000293633	0.377778	0.0203289
basophils	ATP2A3	4.2001	3.9811	2.66797e-05	0.000332629	0.444444	0.145374
basophils	MMP25	4.19274	5.05028	2.75601e-05	0.000341818	0.4	0.062884
basophils	IKZF2	4.18823	6.41697	2.81142e-05	0.000347286	0.377778	0.0264727
basophils	RAB37	4.12907	4.47369	3.64229e-05	0.00043612	0.4	0.071648
basophils	STXBP5	4.09315	3.81874	4.2555e-05	0.000499242	0.444444	0.16227
basophils	TRPM6	4.08826	8.50653	4.34616e-05	0.000507935	0.355556	0.00451753
basophils	PTGDR2	4.05511	7.37958	5.01103e-05	0.000574076	0.355556	0.00903506
basophils	TMEM164	3.94367	3.66437	8.02441e-05	0.000869641	0.444444	0.186935
basophils	RHEX	3.90593	4.22764	9.38625e-05	0.000994637	0.377778	0.0490604
basophils	RHOH	3.8925	3.81895	9.92163e-05	0.0010417	0.422222	0.147181
basophils	S1PR1	3.88321	4.50656	0.000103086	0.00107539	0.377778	0.068034
basophils	HSH2D	3.84953	3.73251	0.000118347	0.00121221	0.422222	0.155222
basophils	HRH4	3.83558	8.69857	0.000125268	0.00127883	0.333333	0.00379472
basophils	RAB44	3.63249	5.28476	0.000280705	0.00259314	0.333333	0.0297253
basophils	LINC02458	3.60369	12.1745	0.000313734	0.00285043	0.311111	0.000451753
basophils	TCN1	3.58253	9.13409	0.000340288	0.00305547	0.311111	0.00307192
basophils	MSI2	3.56097	3.41627	0.000369489	0.00328335	0.422222	0.196874
basophils	CA8	3.55764	7.74477	0.000374202	0.0033211	0.311111	0.00605349
basophils	KLF5	3.51892	6.95635	0.000433299	0.00375555	0.311111	0.0110228
basophils	THSD7A	3.32058	8.42216	0.000898311	0.0071113	0.288889	0.00352367
basophils	CNR2	3.27709	7.46397	0.00104882	0.00815841	0.288889	0.008764
basophils	ANKRD28	3.23637	3.30434	0.00121058	0.00921532	0.377778	0.153777
basophils	ENPP3	3.17941	5.69602	0.00147576	0.0109365	0.288889	0.0203289
basophils	ERN1	3.17666	3.38426	0.00148981	0.011033	0.377778	0.16507
basophils	AC111000.4	3.0912	14.7592	0.00199349	0.014214	0.266667	9.03506e-05
basophils	CHD7	3.02222	3.58459	0.00250927	0.0173165	0.355556	0.146549
basophils	ISPD	3.01112	6.90656	0.00260289	0.017825	0.266667	0.00948681
basophils	EPAS1	2.96626	3.54998	0.0030145	0.0202434	0.333333	0.114745
basophils	SFXN1	2.94719	3.71657	0.00320677	0.0213146	0.355556	0.156939
basophils	IL1RL1	2.8774	4.52322	0.00400973	0.0258048	0.266667	0.0215034
basophils	MCTP2	2.85595	4.28468	0.00429077	0.027278	0.288889	0.0591796
basophils	CD244	2.77738	3.30984	0.00547984	0.0334889	0.333333	0.140043
basophils	USP49	2.66527	4.07146	0.00769271	0.0446365	0.288889	0.0827611
basophils	TESPA1	2.65998	4.18752	0.00781447	0.0452207	0.266667	0.0493314
basophils	P2RY10	2.58174	4.42058	0.00983041	0.0551474	0.266667	0.0599024
basophils	IL4	2.57664	29.3204	0.00997658	0.055807	0.222222	0
basophils	TRAT1	2.55138	8.28267	0.0107297	0.0592022	0.222222	0.00280087
basophils	ITGA2B	2.5061	6.76006	0.0122071	0.0658807	0.222222	0.00777015
basophils	TNIK	2.47947	4.01049	0.0131578	0.0703575	0.266667	0.0717383
basophils	REPS2	2.41945	3.58454	0.0155439	0.0807236	0.288889	0.112035
basophils	CHRM3-AS2	2.30221	8.87635	0.0213231	0.104422	0.2	0.00180701
basophils	NTRK1	2.2287	5.60002	0.0258341	0.122436	0.2	0.00957716
basophils	AC020571.1	2.21245	5.59696	0.0269358	0.126595	0.2	0.0113842
basophils	ADAM19	2.16442	2.56104	0.0304322	0.139808	0.311111	0.176003
basophils	SOCS2	2.10305	4.44462	0.0354611	0.157687	0.222222	0.052313
basophils	OSGIN2	2.06995	2.77476	0.0384571	0.168086	0.311111	0.191272
basophils	AL356489.2	2.04667	8.43882	0.0406906	0.175701	0.177778	0.00153596
basophils	SEMA3C	2.03796	2.87519	0.0415537	0.178924	0.266667	0.122425
basophils	SLC10A3	2.02234	3.25991	0.0431411	0.184612	0.266667	0.125407
basophils	SPTBN1	1.99303	3.09151	0.046258	0.195318	0.266667	0.128388
basophils	MTURN	1.95746	3.06092	0.0502935	0.209457	0.266667	0.132906
basophils	DEPDC5	1.95003	2.90627	0.0511722	0.212252	0.288889	0.169136
basophils	FAM19A2	1.94938	4.06511	0.0512499	0.21241	0.2	0.0395735
basophils	WWC3	1.90087	2.87796	0.0573196	0.232539	0.288889	0.17519
basophils	IL18R1	1.88417	3.94538	0.0595415	0.239901	0.2	0.0463498
basophils	YES1	1.86876	3.41189	0.0616559	0.246674	0.222222	0.0781532
basophils	CAPN12	1.85344	5.13051	0.0638187	0.253727	0.177778	0.0217745
basophils	FAM117A	1.83964	3.01578	0.0658212	0.260078	0.244444	0.113029
basophils	ABLIM1	1.83589	5.01164	0.0663738	0.261653	0.177778	0.0235815
basophils	CACNG6	1.80188	12.5923	0.0715645	0.277661	0.155556	0.000180701
basophils	ALS2	1.77357	3.0848	0.0761343	0.291256	0.222222	0.0883628
basophils	HELB	1.77259	2.95998	0.0762963	0.291749	0.266667	0.154951
basophils	GCNT4	1.74587	6.05805	0.0808341	0.305641	0.155556	0.00587279
basophils	C5orf30	1.69193	4.03991	0.0906599	0.333374	0.177778	0.038399
basophils	AL391832.2	1.68529	3.47018	0.0919322	0.33698	0.2	0.0682147
basophils	GDPD5	1.67454	3.96865	0.0940252	0.343421	0.177778	0.0404771
basophils	AC020911.2	1.67358	3.95993	0.0942127	0.34393	0.177778	0.0405674
basophils	KIF21B	1.67235	3.51636	0.0944557	0.344616	0.2	0.0695699
basophils	SOCS1	1.67044	2.87803	0.0948325	0.345488	0.244444	0.129743
basophils	CAV2	1.65722	5.22786	0.0974758	0.353677	0.155556	0.0148175
mast cells	TPSB2	28.6079	14.9812	5.353e-180	1.14924e-175	0.992958	0.00738757
mast cells	TPSAB1	28.5063	14.9698	9.77746e-179	1.04956e-174	0.989437	0.00535599
mast cells	MS4A2	28.3245	11.0691	1.72656e-176	1.23558e-172	0.985915	0.00904977
mast cells	CPA3	28.1994	12.9351	5.93949e-175	3.18787e-171	0.978873	0.00378613
mast cells	HPGDS	27.9619	6.53874	4.72238e-172	1.44835e-168	0.978873	0.165389
mast cells	CLU	27.1868	7.42628	9.30128e-163	1.66408e-159	0.950704	0.0762767
mast cells	KIT	27.0369	9.48272	5.44931e-161	8.99933e-158	0.940141	0.0221627
mast cells	HPGD	26.9646	9.00523	3.84544e-160	5.89698e-157	0.940141	0.035645
mast cells	RHEX	26.6827	8.82334	7.47032e-157	9.43414e-154	0.929577	0.027334
mast cells	VWA5A	26.276	7.50526	3.60806e-152	4.07692e-149	0.919014	0.0804322
mast cells	SLC18A2	26.1182	9.58726	2.26764e-150	2.31829e-147	0.908451	0.0127436
mast cells	GATA2	25.1657	8.4418	9.50405e-140	7.55713e-137	0.880282	0.0124665
mast cells	HDC	24.7017	8.96445	1.02515e-134	6.47323e-132	0.862676	0.00498661
mast cells	RGS13	23.8909	9.6716	3.80717e-126	1.40924e-123	0.830986	0.00858805
mast cells	AL157895.1	22.9271	15.317	2.49657e-116	7.8822e-114	0.795775	0.000184689
mast cells	BACE2	22.6915	8.20106	5.43604e-114	1.57711e-111	0.792254	0.0150522
mast cells	IL1RL1	22.4673	9.87108	8.66783e-112	2.2974e-109	0.78169	0.00258565
mast cells	MAOB	21.1522	9.45609	2.63136e-99	5.48473e-97	0.735915	0.00581771
mast cells	CAVIN2	19.8374	6.32123	1.4161e-87	2.28588e-85	0.704225	0.0298273
mast cells	MLPH	19.7286	7.68004	1.22613e-86	1.93557e-84	0.690141	0.0127436
mast cells	SLC45A3	19.7272	7.31572	1.25928e-86	1.9734e-84	0.693662	0.019023
mast cells	RAB27B	19.5552	10.5493	3.72712e-85	5.55678e-83	0.679577	0.00240096
mast cells	TIMP3	19.4642	5.7931	2.21044e-84	3.27282e-82	0.697183	0.0470034
mast cells	LAT	18.8692	5.09482	2.04214e-79	2.60969e-77	0.68662	0.0855111
mast cells	GRAP2	18.4152	7.76209	9.91483e-76	1.15686e-73	0.644366	0.0122818
mast cells	ITM2C	18.2979	3.94263	8.60607e-75	9.82785e-73	0.707746	0.174162
mast cells	TSC22D1	17.2316	4.03203	1.53713e-66	1.44107e-64	0.672535	0.167975
mast cells	CTSG	17.2271	9.5337	1.66273e-66	1.55205e-64	0.602113	0.0102503
mast cells	RHOBTB3	17.154	3.57033	5.8709e-66	5.40954e-64	0.683099	0.193277
mast cells	CD69	16.7235	5.32753	8.83363e-63	7.37934e-61	0.623239	0.0866193
mast cells	ADRB2	16.5307	4.28929	2.2063e-61	1.81483e-59	0.630282	0.121341
mast cells	TESPA1	16.4463	5.99262	8.9164e-61	7.16952e-59	0.588028	0.0361068
mast cells	GCSAML	16.3299	7.82242	6.05243e-60	4.7597e-58	0.570423	0.00313972
mast cells	SMYD3	16.2378	4.86083	2.72342e-59	2.07337e-57	0.598592	0.0746145
mast cells	ITM2A	16.0171	6.31687	9.70451e-58	7.03872e-56	0.566901	0.0193
mast cells	KLRG1	15.6132	5.73939	5.92158e-55	3.93593e-53	0.559859	0.0339828
mast cells	CNRIP1	15.4075	4.56101	1.45642e-53	9.25085e-52	0.573944	0.0724905
mast cells	PBX1	15.088	5.95432	1.94153e-51	1.16758e-49	0.538732	0.0266876
mast cells	SKAP1	14.767	6.63952	2.39062e-49	1.3542e-47	0.521127	0.0141287
mast cells	TPSD1	14.7003	11.4713	6.4198e-49	3.57991e-47	0.510563	0.000646412
mast cells	RHOH	14.4495	3.67695	2.52415e-47	1.35478e-45	0.573944	0.137132
mast cells	ZNRF1	14.4076	3.9859	4.63399e-47	2.45042e-45	0.552817	0.0975159
mast cells	GMPR	13.9879	5.36268	1.84737e-44	9.11753e-43	0.507042	0.0388771
mast cells	MEIS2	13.9553	7.34096	2.91885e-44	1.4307e-42	0.489437	0.00831102
mast cells	CALB2	13.6855	6.84908	1.2401e-42	5.72555e-41	0.482394	0.011266
mast cells	HS3ST1	13.6355	4.08456	2.46129e-42	1.12909e-40	0.528169	0.0943762
mast cells	PLAT	13.6118	4.74568	3.407e-42	1.55627e-40	0.510563	0.0665805
mast cells	KRT19	13.2088	4.23417	7.80846e-40	3.32619e-38	0.5	0.0664881
mast cells	SVOPL	13.1828	12.0714	1.10173e-39	4.66531e-38	0.457746	0.000369379
mast cells	CD22	13.0497	5.03069	6.37689e-39	2.63787e-37	0.478873	0.043956
mast cells	KRT1	12.9819	12.5825	1.55031e-38	6.35183e-37	0.450704	0.000184689
mast cells	LAX1	12.8347	8.88635	1.04747e-37	4.13383e-36	0.447183	0.00277034
mast cells	TNIK	12.7441	4.25861	3.36309e-37	1.29163e-35	0.482394	0.0617786
mast cells	DLC1	12.6249	5.92707	1.53901e-36	5.76633e-35	0.450704	0.0195771
mast cells	LIF	12.5527	7.55351	3.84111e-36	1.4292e-34	0.440141	0.00674116
mast cells	P2RX1	12.4147	2.86218	2.17635e-35	7.89257e-34	0.538732	0.174254
mast cells	TMEM233	12.1617	10.574	4.97019e-34	1.73504e-32	0.422535	0.000554068
mast cells	SYTL2	12.0467	5.62395	2.01868e-33	6.87923e-32	0.433099	0.0225321
mast cells	IL18R1	11.9844	4.99909	4.29034e-33	1.44826e-31	0.440141	0.0366608
mast cells	SVIP	11.6985	2.75358	1.29711e-31	4.15018e-30	0.521127	0.190599
mast cells	STXBP6	11.6941	6.96572	1.36602e-31	4.35121e-30	0.411972	0.00895743
mast cells	CTTNBP2	11.6639	3.5039	1.94965e-31	6.15544e-30	0.482394	0.127159
mast cells	DHRS9	11.6	3.4317	4.12261e-31	1.29021e-29	0.471831	0.106196
mast cells	CADPS	11.4485	10.3111	2.39377e-30	7.24848e-29	0.397887	0.000831102
mast cells	ANKRD28	11.3337	2.95363	8.93215e-30	2.64503e-28	0.492958	0.145812
mast cells	INKA1	11.3205	5.28365	1.03868e-29	3.06733e-28	0.408451	0.0213316
mast cells	NDFIP2	11.2426	5.9594	2.51937e-29	7.30923e-28	0.401408	0.016345
mast cells	FERMT2	11.1678	5.71465	5.86205e-29	1.68027e-27	0.401408	0.0205929
mast cells	ACOT7	11.0005	3.91365	3.8011e-28	1.05434e-26	0.43662	0.0896666
mast cells	AC106739.1	10.7796	5.12196	4.29768e-27	1.13769e-25	0.397887	0.0367532
mast cells	RAB37	10.5393	3.53686	5.69365e-26	1.43978e-24	0.415493	0.0639948
mast cells	NMT2	10.3286	4.79253	5.23267e-25	1.27226e-23	0.383803	0.0369379
mast cells	SOCS1	10.2562	3.96913	1.10952e-24	2.65852e-23	0.433099	0.122264
mast cells	CDK15	10.2343	9.92674	1.39144e-24	3.3229e-23	0.355634	0.000369379
mast cells	COL18A1	10.2221	3.5134	1.57803e-24	3.75397e-23	0.411972	0.0821867
mast cells	ARMH1	10.1392	2.86442	3.70012e-24	8.61581e-23	0.447183	0.143319
mast cells	HS6ST1	9.67902	3.11694	3.70258e-22	7.82389e-21	0.411972	0.111275
mast cells	MYB	9.62705	4.35343	6.14689e-22	1.28623e-20	0.362676	0.0391541
mast cells	MAST4	9.61769	5.0588	6.73257e-22	1.40605e-20	0.352113	0.0255795
mast cells	NTRK1	9.48239	7.62645	2.48524e-21	5.00992e-20	0.330986	0.00193924
mast cells	CATSPER1	9.40464	2.53809	5.22083e-21	1.02549e-19	0.43662	0.165666
mast cells	NTM	9.1939	9.26142	3.78835e-20	7.10323e-19	0.320423	0.00184689
mast cells	AL078590.3	9.15577	7.87952	5.39739e-20	9.98075e-19	0.320423	0.00378613
mast cells	STXBP5	9.06808	2.54008	1.21127e-19	2.19449e-18	0.422535	0.156616
mast cells	HOXB2	9.02092	3.12993	1.8651e-19	3.34518e-18	0.387324	0.109613
mast cells	CTSW	8.90627	3.75421	5.27775e-19	9.20456e-18	0.348592	0.0529135
mast cells	ADAM12	8.806	5.73879	1.29691e-18	2.2133e-17	0.316901	0.0153292
mast cells	AC020571.1	8.61584	6.76978	6.94323e-18	1.13185e-16	0.302817	0.00452489
mast cells	AKAP5	8.45785	5.90911	2.72361e-17	4.31855e-16	0.302817	0.0123742
mast cells	HES1	8.44246	3.54508	3.1072e-17	4.91225e-16	0.334507	0.0504202
mast cells	TMEM44	8.38817	5.28141	4.93758e-17	7.76024e-16	0.306338	0.0208699
neutrophils	FCGR3B	6.4829	10.3318	8.99748e-11	2.03333e-08	0.714286	0.0204781
neutrophils	MME	5.14752	8.17812	2.63947e-07	1.59176e-05	0.571429	0.0206585
neutrophils	CMTM2	4.74295	6.69471	2.10631e-06	8.97228e-05	0.535714	0.0366261
neutrophils	CXCR2	4.62758	6.38097	3.6996e-06	0.000141329	0.535714	0.0647722
neutrophils	CYP4F3	4.52758	8.03333	5.96629e-06	0.000206931	0.5	0.00992332
neutrophils	IL1R2	4.49004	5.31844	7.12101e-06	0.000239692	0.535714	0.0890392
neutrophils	STEAP4	3.65131	4.0775	0.000260909	0.00445267	0.464286	0.118448
neutrophils	MCTP2	3.22724	4.55926	0.00124992	0.0154577	0.392857	0.0592693
neutrophils	MMP25	2.87471	4.4216	0.00404398	0.0384501	0.357143	0.0635092
neutrophils	CXCR1	2.58712	7.74127	0.00967815	0.0749298	0.285714	0.00423996
neutrophils	SYNE2	2.5822	4.73732	0.00981737	0.0757345	0.321429	0.0555706
neutrophils	ADGRG3	2.48892	5.73571	0.0128132	0.0935034	0.285714	0.0186739
neutrophils	S100P	2.45312	5.33648	0.0141624	0.100914	0.285714	0.0246279
neutrophils	ATP2A3	2.33126	3.20134	0.0197395	0.129876	0.357143	0.146053
neutrophils	FFAR2	2.20481	4.25064	0.0274675	0.16635	0.285714	0.0623365
neutrophils	ANXA3	2.17741	6.22572	0.0294498	0.174947	0.25	0.0160577
neutrophils	TUBA4A	2.16983	2.93498	0.0300194	0.177349	0.357143	0.185566
neutrophils	LIMK2	2.09334	3.33146	0.0363191	0.204387	0.321429	0.135589
neutrophils	PROK2	2	4.70515	0.0455003	0.243785	0.25	0.0418584
neutrophils	IL18RAP	1.93869	8.51883	0.0525392	0.269848	0.214286	0.00315742
neutrophils	ALPL	1.92742	7.93138	0.0539268	0.274675	0.214286	0.00469102
neutrophils	KCNJ15	1.90085	4.19931	0.0573212	0.287147	0.25	0.0562923
neutrophils	HIST1H2AC	1.82571	3.10466	0.0678936	0.324583	0.321429	0.177898
neutrophils	PPP1R12B	1.82002	2.86687	0.0687558	0.327444	0.321429	0.179612
neutrophils	LINC01506	1.81922	3.75575	0.0688772	0.327731	0.25	0.0682003
neutrophils	AC084871.2	1.81094	5.33697	0.0701505	0.332059	0.214286	0.020839
neutrophils	NFE2	1.80799	2.37064	0.0706083	0.333823	0.321429	0.171673
neutrophils	MGAM	1.78398	5.14448	0.0744263	0.347814	0.214286	0.0245377
neutrophils	G0S2	1.77921	3.23628	0.075206	0.350694	0.285714	0.116554
neutrophils	HCAR3	1.74022	4.53442	0.0818204	0.373507	0.214286	0.0304917
neutrophils	SULT1B1	1.64096	2.98576	0.100807	0.431635	0.25	0.0899414
neutrophils	PGGHG	1.56236	3.35788	0.118202	0.484248	0.25	0.105368
neutrophils	MRVI1	1.51079	3.01018	0.130843	0.519428	0.25	0.112494
neutrophils	VNN3	1.49628	3.53105	0.134582	0.52963	0.214286	0.0645016
neutrophils	CEACAM3	1.47516	3.41123	0.140169	0.544372	0.214286	0.0669373
neutrophils	TNFRSF10C	1.47327	4.98103	0.140677	0.545654	0.178571	0.0213802
neutrophils	HAL	1.33809	2.98832	0.180867	0.650206	0.214286	0.0863329
neutrophils	DAPK2	1.30188	3.1236	0.192958	0.682997	0.214286	0.0869644
neutrophils	CCNJL	1.28495	7.9348	0.19881	0.697313	0.142857	0.00288678
neutrophils	ULK1	1.27988	2.15474	0.200588	0.701945	0.285714	0.199008
neutrophils	C4BPA	1.27893	6.9936	0.20092	0.702649	0.142857	0.00360848
neutrophils	LUCAT1	1.27705	2.48989	0.201586	0.704012	0.25	0.146234
neutrophils	KRT23	1.22821	5.69083	0.219368	0.746255	0.142857	0.0101037
neutrophils	RGL4	1.17802	5.07955	0.238789	0.791504	0.142857	0.0165088
neutrophils	KIAA1324	1.14039	4.96037	0.254125	0.823224	0.142857	0.02129
neutrophils	LRG1	1.07923	2.17796	0.280487	0.877427	0.214286	0.112043
neutrophils	CXCL8	1.07651	2.63447	0.281698	0.879805	0.214286	0.114389
neutrophils	TSPAN2	1.04649	3.54824	0.295334	0.910603	0.142857	0.033198
neutrophils	SLC44A2	1.04148	2.39322	0.297654	0.915767	0.214286	0.12359
neutrophils	PADI2	1.0331	2.53757	0.301556	0.923157	0.214286	0.120974
neutrophils	ZNF746	1.02623	2.48716	0.304782	0.929395	0.25	0.183491
neutrophils	MBOAT2	1.0134	3.30254	0.310868	0.940485	0.178571	0.0823636
neutrophils	LIN7A	1.00886	2.39802	0.313041	0.94511	0.178571	0.0823636
neutrophils	DHRS12	0.991846	2.70684	0.321273	0.961746	0.178571	0.08083
monocytes-CD16-	S100A12	74.7218	5.46806	0	0	0.932969	0.142726
monocytes-CD16-	CDA	47.1091	3.05312	0	0	0.66916	0.163153
monocytes-CD16-	RBP7	46.0212	3.18957	0	0	0.649597	0.161189
monocytes-CD16-	RAB3D	43.583	2.95549	0	0	0.618239	0.155166
monocytes-CD16-	VNN2	43.4245	3.76544	0	0	0.577963	0.0996465
monocytes-CD16-	LINC00937	39.0728	3.21682	0	0	0.544304	0.121907
monocytes-CD16-	CYP1B1	37.0959	2.39312	3.27159e-301	3.67737e-299	0.609896	0.197329
monocytes-CD16-	SLC24A4	36.4677	2.53797	3.60489e-291	3.75696e-289	0.559264	0.161058
monocytes-CD16-	NHSL2	36.2817	3.0754	3.13929e-288	3.22476e-286	0.508343	0.107241
monocytes-CD16-	NRGN	35.2405	2.4995	4.79056e-272	4.57105e-270	0.543441	0.17939
monocytes-CD16-	FOLR3	34.6999	4.80717	7.91045e-264	7.13569e-262	0.437572	0.0370564
monocytes-CD16-	NLRP12	33.9128	3.14107	4.32063e-252	3.6956e-250	0.472382	0.0958492
monocytes-CD16-	MEFV	32.7454	2.67539	3.53095e-235	2.80763e-233	0.48389	0.124525
monocytes-CD16-	CRISPLD2	32.5602	3.7219	1.5031e-232	1.17774e-230	0.429804	0.0572214
monocytes-CD16-	NFE2	31.8581	3.46587	1.01705e-222	7.47775e-221	0.424626	0.0570905
monocytes-CD16-	MPP7	31.1028	4.12263	2.20645e-212	1.51828e-210	0.399597	0.0417703
monocytes-CD16-	PLCB1	30.4792	3.45587	4.91313e-204	3.16757e-202	0.411105	0.0637685
monocytes-CD16-	EIF4E3	30.0393	2.64844	3.00961e-198	1.87285e-196	0.451669	0.133167
monocytes-CD16-	APOBEC3A	29.5276	1.81201	1.27428e-191	7.5993e-190	0.518987	0.16407
monocytes-CD16-	CLEC4D	28.8419	3.29925	6.40143e-183	3.65512e-181	0.395282	0.0673039
monocytes-CD16-	VSTM1	28.2652	3.4868	9.26393e-176	4.99717e-174	0.380322	0.0569595
monocytes-CD16+	TCF7L2	32.7976	3.57603	6.37902e-236	1.71189e-232	0.802853	0.199768
monocytes-CD16+	GPBAR1	27.7808	2.81674	7.40757e-170	7.95166e-167	0.743191	0.198414
monocytes-CD16+	CDKN1C	26.1403	5.04692	1.26916e-150	7.5688e-148	0.61738	0.117385
monocytes-CD16+	GCH1	24.7556	2.58187	2.70136e-135	1.07399e-132	0.683528	0.182653
monocytes-CD16+	CD79B	23.2111	4.87037	3.51664e-119	1.03423e-116	0.526589	0.0361632
monocytes-CD16+	HES4	22.0012	4.52213	2.80446e-107	7.00104e-105	0.507134	0.0434152
monocytes-CD16+	PLAGL2	21.7023	2.72879	1.95158e-104	4.45729e-102	0.586252	0.153259
monocytes-CD16+	SYTL1	20.0861	3.01968	9.76984e-90	1.70527e-87	0.518807	0.104332
monocytes-CD16+	CDH23	19.8089	2.42613	2.49578e-87	4.12169e-85	0.560311	0.154902
monocytes-CD16+	SH2D3C	17.9804	2.11762	2.77409e-72	3.50335e-70	0.544747	0.186618
monocytes-CD16+	CCDC88C	17.677	1.99368	6.30352e-70	7.56035e-68	0.54345	0.163895
monocytes-CD16+	ADA	17.5309	2.86188	8.3311e-69	9.66813e-67	0.461738	0.110037
monocytes-CD16+	TBC1D10C	17.2042	2.01999	2.46808e-66	2.59924e-64	0.533074	0.192613
monocytes-CD16+	CYFIP2	17.0929	2.60419	1.67617e-65	1.7136e-63	0.463035	0.101915
monocytes-CD16+	IFIT2	16.3259	2.07789	6.45993e-60	5.95229e-58	0.50454	0.162444
monocytes-CD16+	ZNF703	16.2173	2.72903	3.80729e-59	3.4344e-57	0.431907	0.0920518
monocytes-CD16+	ADGRE1	16.0652	2.57883	4.47378e-58	3.98538e-56	0.439689	0.104719
monocytes-CD16+	PTP4A3	15.9703	4.48513	2.05725e-57	1.80274e-55	0.364462	0.0218526
monocytes-CD16+	BATF3	15.0473	1.89337	3.59423e-51	2.66085e-49	0.473411	0.165829
M1-LYVE1	SELENOP	45.9023	6.96545	0	0	0.900866	0.129839
M1-LYVE1	FOLR2	43.6167	4.94677	0	0	0.887392	0.188803
M1-LYVE1	PLTP	38.854	4.11574	0	0	0.824832	0.176792
M1-LYVE1	LYVE1	29.5676	4.51638	3.90426e-192	1.52401e-189	0.620789	0.0869565
M1-LYVE1	SIGLEC1	28.8144	2.99573	1.41544e-182	4.90131e-180	0.66795	0.189796
M1-LYVE1	IGF1	28.7934	3.60725	2.59503e-182	8.84329e-180	0.630414	0.139468
M1-LYVE1	RGL1	27.2087	3.12462	5.13072e-163	1.21046e-160	0.622714	0.166766
M1-LYVE1	LILRB5	26.7377	4.81091	1.71557e-157	3.50778e-155	0.538017	0.0495335
M1-LYVE1	CD209	26.6136	4.60783	4.71928e-156	9.29525e-154	0.539942	0.0584673
M1-LYVE1	SDC3	26.295	3.07129	2.18784e-152	4.0492e-150	0.596728	0.137383
M1-LYVE1	SLC7A8	25.7423	3.55601	3.93329e-146	6.80998e-144	0.553417	0.0939051
M1-LYVE1	GATM	25.0485	2.76498	1.81203e-138	2.77875e-136	0.604427	0.196843
M1-LYVE1	NRP2	24.8075	2.53352	7.44525e-136	1.09481e-133	0.61309	0.19595
M1-LYVE1	COLEC12	23.9626	3.36724	6.8336e-127	8.73277e-125	0.53898	0.120111
M1-LYVE1	C2	23.9279	3.08845	1.57122e-126	1.996e-124	0.553417	0.139567
M1-LYVE1	OLFML2B	22.7888	2.62075	5.91694e-115	6.58191e-113	0.559192	0.173715
M1-LYVE1	CD163L1	22.7144	4.63386	3.23089e-114	3.53898e-112	0.458133	0.0420885
M1-LYVE1	PDGFC	21.9999	2.84361	2.88593e-107	2.89524e-105	0.519731	0.14195
M1-LYVE1	FRMD4A	21.336	2.60179	5.26197e-101	4.82775e-99	0.528393	0.172027
M1-LYVE1	TMEM37	21.2984	3.53977	1.17581e-100	1.07419e-98	0.455245	0.0679968
M1-LYVE1	KCNMA1	20.8378	2.61368	1.96819e-96	1.68347e-94	0.509143	0.149196
M1-LYVE1	ME1	20.7444	3.6713	1.37688e-95	1.15021e-93	0.442733	0.0680961
M1-LYVE1	SCN1B	19.5665	3.85133	2.98502e-85	2.18722e-83	0.412897	0.0584673
M1-LYVE1	CXCL12	19.5051	5.04347	9.94288e-85	7.18733e-83	0.38691	0.0249156
M1-LYVE1	IL2RA	19.4862	3.47018	1.43669e-84	1.03158e-82	0.419634	0.0599563
M1-LYVE1	SERPING1	18.8573	2.25053	2.55835e-79	1.74921e-77	0.499519	0.174112
M1-LYVE1	WLS	18.5345	2.63768	1.08704e-76	7.00831e-75	0.452358	0.123585
M1-LYVE1	IGFBP4	17.4086	3.05744	7.1006e-68	3.9493e-66	0.403272	0.0966845
M1-LYVE1	RHOBTB3	17.3824	2.06933	1.12218e-67	6.19335e-66	0.475457	0.177983
M1-LYVE1	ENPP2	17.1807	2.20887	3.70308e-66	1.98258e-64	0.475457	0.192674
M1-LYVE1	MAMDC2	17.1174	6.00586	1.10063e-65	5.86338e-64	0.331088	0.011217
M1-LYVE1	HRH1	17.0311	4.6325	4.83254e-65	2.53667e-63	0.3436	0.029184
M1-LYVE1	RAPH1	16.7959	2.07592	2.61307e-63	1.3421e-61	0.46487	0.180762
M1-LYVE1	GAL3ST4	16.7657	3.05044	4.34608e-63	2.21104e-61	0.38691	0.0876514
M1-LYVE1	EPHX1	16.5266	2.69732	2.36236e-61	1.15793e-59	0.401347	0.112269
M1-LYVE1	FAM20A	16.2775	2.07175	1.4265e-59	6.73087e-58	0.445621	0.161703
M1-LYVE1	GPX3	16.1196	2.24224	1.85839e-58	8.63589e-57	0.424447	0.14453
M1-LYVE1	TNFRSF21	16.0345	3.21447	7.33202e-58	3.34917e-56	0.358999	0.0697836
M1-LYVE1	PEAK1	15.5205	2.28409	2.5208e-54	1.109e-52	0.413859	0.147905
M1-LYVE1	BLNK	14.7866	1.85449	1.78821e-49	7.29867e-48	0.425409	0.16895
M1-LYVE1	APPL2	14.5005	1.97266	1.20196e-47	4.71754e-46	0.412897	0.171332
M2-peritoneal	LYVE1	17.6497	4.52994	1.02257e-69	3.13622e-66	0.878613	0.125137
M2-peritoneal	SDC3	15.5817	3.12845	9.70038e-55	1.09609e-51	0.82659	0.17011
M2-peritoneal	C2	15.1745	3.57409	5.22078e-52	3.61565e-49	0.786127	0.168647
M2-peritoneal	ECM1	14.0759	3.57382	5.34066e-45	1.54944e-42	0.699422	0.0936015
M2-peritoneal	FAM20A	13.8431	2.79925	1.39965e-43	3.52733e-41	0.757225	0.17925
M2-peritoneal	MLXIPL	13.3261	3.15801	1.63263e-40	3.4704e-38	0.693642	0.119561
M2-peritoneal	S1PR1	12.5447	3.74883	4.24871e-36	7.07097e-34	0.612717	0.0606947
M2-peritoneal	TNS1	12.2432	2.57708	1.82648e-34	2.7231e-32	0.687861	0.147623
M2-peritoneal	RAPH1	11.7094	2.45849	1.14099e-31	1.47566e-29	0.682081	0.199817
M2-peritoneal	LILRB5	10.5781	2.82111	3.76693e-26	3.57842e-24	0.560694	0.0878428
M2-peritoneal	SLC39A8	10.4104	2.6111	2.22212e-25	2.00448e-23	0.601156	0.163803
M2-peritoneal	SERPING1	10.3908	2.11891	2.73024e-25	2.44231e-23	0.647399	0.197532
M2-peritoneal	IL3RA	10.3079	2.53891	6.48841e-25	5.6857e-23	0.583815	0.139305
M2-peritoneal	ME1	10.216	2.6154	1.68184e-24	1.4501e-22	0.554913	0.0959781
M2-peritoneal	CD226	10.2138	2.52299	1.72038e-24	1.47151e-22	0.583815	0.155759
M2-peritoneal	EMP1	10.1539	2.17849	3.18433e-24	2.68096e-22	0.595376	0.134918
M2-peritoneal	MGLL	10.1443	1.98194	3.5131e-24	2.92336e-22	0.647399	0.194973
M2-peritoneal	NR1H3	9.7205	2.39394	2.46558e-22	1.87708e-20	0.549133	0.117642
M2-peritoneal	SLC7A8	9.60384	2.25121	7.70218e-22	5.702e-20	0.560694	0.130165
M2-peritoneal	KIFC3	9.45773	2.06066	3.14689e-21	2.2371e-19	0.583815	0.171207
M2-peritoneal	DEFB1	9.38724	3.41816	6.15944e-21	4.3074e-19	0.468208	0.0543876
M2-peritoneal	COLEC12	9.29723	2.35661	1.44156e-20	9.79392e-19	0.554913	0.153016
M2-peritoneal	LUCAT1	9.23619	2.03456	2.55432e-20	1.70307e-18	0.560694	0.139945
M2-peritoneal	DNM1	9.19649	3.27664	3.69824e-20	2.42806e-18	0.462428	0.0601463
M2-peritoneal	SLC2A5	9.00963	2.09781	2.06755e-19	1.2792e-17	0.572254	0.196892
M5-activated	NRP2	25.517	2.18199	1.27805e-143	8.57453e-141	0.722158	0.193517
M5-activated	SLC2A5	25.3743	2.65606	4.84488e-142	3.15196e-139	0.665901	0.163347
M5-activated	VAT1	24.8723	2.38045	1.48349e-136	7.76805e-134	0.679679	0.185706
M5-activated	MMP9	23.9264	4.7091	1.62893e-126	7.4732e-124	0.553387	0.0908026
M5-activated	PLTP	23.9262	2.05947	1.63604e-126	7.4732e-124	0.701493	0.197911
M5-activated	SCD	23.7515	2.38276	1.059e-124	4.63995e-122	0.659013	0.192638
M5-activated	NUPR1	23.1423	3.99953	1.73645e-118	7.03394e-116	0.540758	0.0874829
M5-activated	SPARC	22.1575	2.74477	8.83194e-109	2.59744e-106	0.580941	0.149873
M5-activated	GSDME	21.7495	2.87993	6.98251e-105	1.87384e-102	0.524684	0.0786956
M5-activated	SLC38A6	20.7681	1.90567	8.41054e-96	1.92091e-93	0.618829	0.192443
M5-activated	PAPSS2	20.1337	1.89309	3.7376e-90	7.10111e-88	0.610792	0.199766
M5-activated	MAPK13	19.8753	2.58499	6.65877e-88	1.22186e-85	0.504018	0.0965632
M5-activated	NR1H3	19.2449	2.72977	1.55765e-82	2.42327e-80	0.484501	0.0937317
M5-activated	MITF	19.2226	1.83603	2.39238e-82	3.69511e-80	0.578645	0.180238
M5-activated	HAMP	19.1719	2.38426	6.36001e-82	9.75307e-80	0.554535	0.176723
M5-activated	TGM2	19.0781	1.73159	3.83806e-81	5.84392e-79	0.595867	0.198692
M5-activated	MGLL	19.0683	2.15753	4.63336e-81	7.00518e-79	0.552239	0.172232
M5-activated	EMP1	18.9469	2.42114	4.68467e-80	6.93622e-78	0.49713	0.111892
M5-activated	PLPP3	18.0323	3.1455	1.08745e-72	1.27576e-70	0.427095	0.0606327
M5-activated	TNS1	17.8835	1.95812	1.58652e-71	1.81176e-69	0.505166	0.126343
M5-activated	RRAGD	17.2758	1.70834	7.15152e-67	7.52105e-65	0.540758	0.189026
M5-activated	HSD3B7	17.2067	2.91252	2.36679e-66	2.44291e-64	0.415614	0.0670767
M5-activated	RAB42	17.1249	3.02059	9.67654e-66	9.75332e-64	0.414466	0.0666862
M5-activated	SLC39A8	16.9429	2.06082	2.17184e-64	2.07232e-62	0.486797	0.143722
M5-activated	CD109	16.8414	2.5395	1.21396e-63	1.14309e-61	0.437428	0.101543
M5-activated	RGCC	16.7161	2.60112	1.00131e-62	9.18684e-61	0.468427	0.14792
M5-activated	CD276	16.5973	2.0086	7.28913e-62	6.54772e-60	0.468427	0.126928
M5-activated	KIFC3	16.5732	1.68886	1.08784e-61	9.57168e-60	0.501722	0.150068
M5-activated	LPL	16.5403	4.42168	1.88066e-61	1.64799e-59	0.362801	0.0285101
M5-activated	FAM20A	16.5145	1.68282	2.88509e-61	2.49758e-59	0.510907	0.160808
M5-activated	PLAU	16.5105	1.68172	3.08531e-61	2.66018e-59	0.531573	0.190002
M5-activated	ELL2	16.1629	1.54413	9.20704e-59	7.45909e-57	0.536165	0.191564
M5-activated	COLEC12	16.1243	1.91074	1.72127e-58	1.38404e-56	0.467279	0.133079
M5-activated	MYO1E	15.8693	1.85727	1.03308e-56	8.12422e-55	0.47302	0.144015
M5-activated	OTOA	15.7687	2.6955	5.11211e-56	3.91971e-54	0.390356	0.068346
M5-activated	KCNMA1	15.6891	1.67606	1.79695e-55	1.35841e-53	0.486797	0.157001
M5-activated	STEAP3	15.4412	2.11459	8.65117e-54	6.31741e-52	0.41791	0.0976372
M5-activated	MRAS	15.1371	1.85898	9.21647e-52	6.40351e-50	0.443169	0.128979
M5-activated	ECM1	14.9547	2.28795	1.45191e-50	9.71062e-49	0.38806	0.0787932
M5-activated	CD83	14.7732	1.33733	2.17953e-49	1.43096e-47	0.508611	0.192833
M5-activated	TCN2	14.7381	1.46871	3.67128e-49	2.37406e-47	0.508611	0.196739
M5-activated	SLC29A1	14.6666	1.79856	1.05443e-48	6.7374e-47	0.439724	0.138645
M5-activated	B3GNT2	14.6448	1.61208	1.45525e-48	9.21619e-47	0.47876	0.178969
M5-activated	SLC48A1	14.5366	1.85662	7.10815e-48	4.3852e-46	0.431688	0.134349
M5-activated	OLFML2B	14.4646	1.44543	2.028e-47	1.22992e-45	0.491389	0.185804
M5-activated	PLXNA1	14.2591	1.94521	3.93523e-46	2.28339e-44	0.396096	0.099297
M5-activated	ADAMDEC1	14.1848	2.3355	1.13715e-45	6.52769e-44	0.378875	0.0909979
M5-activated	LINC01094	14.1651	1.33877	1.50562e-45	8.61979e-44	0.501722	0.197032
M4-infiltrated	HBEGF	32.9652	3.26315	2.55972e-238	4.22728e-235	0.685976	0.186308
M4-infiltrated	CLEC5A	32.9022	3.209	2.04395e-237	3.13439e-234	0.681402	0.1809
M4-infiltrated	TGM2	31.9616	3.66353	3.73298e-224	4.21807e-221	0.658537	0.172431
M4-infiltrated	SEMA6B	28.9366	2.73328	4.13235e-184	2.95724e-181	0.629573	0.187328
M4-infiltrated	FLNB	23.3731	2.72273	8.0248e-121	2.29713e-118	0.519055	0.167534
M4-infiltrated	THBD	22.1943	2.76201	3.89442e-109	9.72202e-107	0.508384	0.173554
M4-infiltrated	MCEMP1	21.0929	2.70284	9.24652e-99	1.90878e-96	0.472561	0.138659
M4-infiltrated	VDR	20.8907	2.3213	6.50073e-97	1.30434e-94	0.488567	0.162738
M4-infiltrated	LUCAT1	20.832	2.66224	2.2214e-96	4.41585e-94	0.448171	0.106112
M4-infiltrated	KIFC3	20.5027	2.4041	2.03489e-93	3.79887e-91	0.461128	0.13968
M4-infiltrated	TNS1	20.3822	2.49629	2.4048e-92	4.45074e-90	0.450457	0.116621
M4-infiltrated	EREG	19.5567	3.3249	3.61914e-85	5.71318e-83	0.398628	0.077033
M4-infiltrated	SMAD7	19.3896	2.56312	9.44918e-84	1.42862e-81	0.436738	0.137027
M4-infiltrated	THBS1	18.891	2.34155	1.35338e-79	1.8274e-77	0.477134	0.177431
M4-infiltrated	OSM	18.7916	3.24413	8.85058e-79	1.18021e-76	0.383384	0.0748903
M4-infiltrated	RGCC	18.3782	2.18462	1.96515e-75	2.37022e-73	0.438262	0.137537
M4-infiltrated	PHLDA1	17.7708	3.2038	1.18898e-70	1.29575e-68	0.365091	0.0745842
M4-infiltrated	SDS	16.1967	2.54068	5.32001e-59	4.35937e-57	0.381098	0.12611
M4-infiltrated	SPHK1	15.3526	2.36253	3.40463e-53	2.43647e-51	0.360518	0.121416
M4-infiltrated	CDCP1	14.9317	2.23512	2.04844e-50	1.33672e-48	0.358994	0.12662
M4-infiltrated	SLC16A10	14.861	2.5399	5.90525e-50	3.81867e-48	0.33003	0.0844812
M4-infiltrated	ELL2	14.7608	1.5682	2.62241e-49	1.64622e-47	0.428354	0.190491
M4-infiltrated	EMP1	14.711	2.20234	5.48012e-49	3.42014e-47	0.352896	0.113866
M4-infiltrated	FLT1	14.5899	3.05209	3.25743e-48	1.98675e-46	0.299543	0.0580553
M4-infiltrated	SDC2	14.5681	2.50222	4.48365e-48	2.70392e-46	0.329268	0.0917253
M4-infiltrated	G0S2	14.3489	2.90062	1.08263e-46	6.29891e-45	0.320884	0.0896847
M4-infiltrated	GK5	14.2581	1.6858	3.98966e-46	2.28411e-44	0.400915	0.182838
M3-APOE	C3	31.5831	3.74889	6.30237e-219	1.35305e-215	0.745652	0.191995
M3-APOE	HAMP	28.0613	3.14969	2.90993e-173	2.49893e-170	0.693478	0.162366
M3-APOE	FCGBP	27.5925	4.3539	1.37061e-167	1.13175e-164	0.627174	0.109683
M3-APOE	BLNK	22.7683	2.56103	9.45078e-115	3.62319e-112	0.583696	0.157657
M3-APOE	FRMD4A	19.8736	2.1618	6.88647e-88	1.54006e-85	0.55	0.174237
M3-APOE	ADORA3	19.1068	2.14938	2.21649e-81	4.57556e-79	0.531522	0.166879
M3-APOE	OLFML3	18.7136	3.20861	3.83603e-78	7.35319e-76	0.440217	0.0777004
M3-APOE	CADM1	17.4004	2.10768	8.18698e-68	1.21218e-65	0.477174	0.135485
M3-APOE	LPAR5	17.1561	2.61813	5.65547e-66	7.98798e-64	0.428261	0.0974198
M3-APOE	HPGDS	15.9002	1.50566	6.32008e-57	7.45527e-55	0.481522	0.159521
M3-APOE	SLC2A5	15.8566	1.57037	1.26536e-56	1.46053e-54	0.501087	0.175807
M3-APOE	GAL3ST4	15.6826	2.3821	1.98973e-55	2.15745e-53	0.4	0.0899637
M3-APOE	SERPINF1	15.3441	1.93503	3.87911e-53	3.87352e-51	0.458696	0.171196
M3-APOE	NCK1-DT	15.0397	1.98191	4.03589e-51	3.73477e-49	0.423913	0.133327
M3-APOE	CCND1	14.9778	1.69782	1.02582e-50	9.37162e-49	0.466304	0.170313
M3-APOE	USP53	14.8996	1.92914	3.31732e-50	2.96748e-48	0.438043	0.153341
M3-APOE	SFMBT2	14.42	1.64054	3.87088e-47	3.14787e-45	0.473913	0.199745
M3-APOE	CXADR	14.197	3.07868	9.56399e-46	7.43947e-44	0.333696	0.056215
M3-APOE	ABCC4	14.1579	1.91578	1.6701e-45	1.28977e-43	0.413043	0.142353
M3-APOE	PALD1	14.1238	1.78286	2.71001e-45	2.06317e-43	0.425	0.152261
M3-APOE	UNC5B	14.1189	2.1693	2.90532e-45	2.20404e-43	0.380435	0.106249
M3-APOE	ADGRG6	14.093	2.50659	4.19152e-45	3.13546e-43	0.348913	0.0705386
M3-APOE	NFATC2	13.9203	1.77388	4.76652e-44	3.43397e-42	0.41413	0.144609
M3-APOE	FSCN1	13.62	1.96363	3.04648e-42	2.07635e-40	0.384783	0.118807
M3-APOE	KCNMA1	13.2619	1.51329	3.85231e-40	2.43968e-38	0.428261	0.160699
M3-APOE	MTUS1	13.0154	2.79262	9.99681e-39	5.96171e-37	0.31413	0.0590601
M3-APOE	MMD	12.9775	1.41737	1.6407e-38	9.65045e-37	0.448913	0.196606
M3-APOE	LINC01094	12.8379	1.25657	1.00573e-37	5.68209e-36	0.463043	0.199058
M3-APOE	IGF1	12.7601	1.34381	2.73736e-37	1.52645e-35	0.425	0.16374
M3-APOE	ITM2C	12.7092	1.54238	5.25363e-37	2.89206e-35	0.413043	0.167468
M3-APOE	SELENOP	12.2276	1.63799	2.21369e-34	1.13698e-32	0.426087	0.181693
M3-APOE	CLECL1	12.2197	1.46546	2.44121e-34	1.24787e-32	0.416304	0.185029
M3-APOE	GPR82	12.1008	1.41327	1.04566e-33	5.28218e-32	0.419565	0.185519
pre-cDC2	NDRG2	28.971	2.77523	1.52481e-184	2.33829e-181	0.722581	0.182166
pre-cDC2	FCER1A	28.8039	2.85078	1.91648e-182	2.28583e-179	0.760215	0.190317
pre-cDC2	CD1C	27.0512	2.66954	3.69412e-161	2.26597e-158	0.698925	0.166159
pre-cDC2	AL138899.1	26.7792	3.26707	5.63868e-158	3.18571e-155	0.619355	0.0983993
pre-cDC2	S100B	26.0085	3.29341	3.97211e-149	1.89505e-146	0.619355	0.122655
pre-cDC2	CD1E	24.8321	2.74635	4.03574e-136	1.63478e-133	0.608602	0.106256
pre-cDC2	ITGB7	24.5228	2.4579	8.43506e-133	3.17706e-130	0.645161	0.196504
pre-cDC2	FCGBP	21.4094	3.11688	1.09293e-101	2.25616e-99	0.533333	0.117745
pre-cDC2	PIGR	21.2263	3.45013	5.45688e-100	1.05544e-97	0.482796	0.0689384
pre-cDC2	PALD1	20.9163	2.07125	3.80285e-97	6.63767e-95	0.562366	0.139448
pre-cDC2	C12orf75	20.3976	2.76538	1.7575e-92	2.67601e-90	0.506452	0.117843
pre-cDC2	LIMA1	19.6626	1.83402	4.50812e-86	6.16464e-84	0.574194	0.184327
pre-cDC2	P2RY6	19.2495	1.63713	1.4261e-82	1.76977e-80	0.597849	0.199941
pre-cDC2	FUT8	18.7786	2.29999	1.13083e-78	1.27109e-76	0.494624	0.129922
pre-cDC2	SEMA4C	18.1492	2.32491	1.30341e-73	1.25484e-71	0.465591	0.103702
pre-cDC2	PARM1	17.9434	2.53831	5.40485e-72	4.93773e-70	0.434409	0.0757144
pre-cDC2	CLECL1	17.6009	1.70447	2.42648e-69	2.10057e-67	0.531183	0.17431
pre-cDC2	CCR6	17.5891	2.49651	2.98606e-69	2.57461e-67	0.424731	0.0710989
pre-cDC2	PRKAR2B	17.2667	1.79641	8.37534e-67	6.63506e-65	0.503226	0.155161
pre-cDC2	AFDN	17.1983	1.7697	2.73394e-66	2.13436e-64	0.5	0.149072
pre-cDC2	ACAT2	16.9656	1.95346	1.47624e-64	1.09666e-62	0.501075	0.179809
pre-cDC2	CA2	16.9169	1.90644	3.37535e-64	2.47322e-62	0.482796	0.145438
pre-cDC2	SNX7	16.7834	2.54119	3.22541e-63	2.29292e-61	0.406452	0.0726701
cDC2-CD1A	FCER1A	41.6807	5.07965	0	0	0.93067	0.180569
cDC2-CD1A	CD1C	41.5312	4.96498	0	0	0.911868	0.152602
cDC2-CD1A	CD1E	38.9734	5.32098	0	0	0.847239	0.0903333
cDC2-CD1A	NDRG2	31.8344	2.95569	2.16189e-222	1.36511e-219	0.80611	0.1794
cDC2-CD1A	SLC38A1	30.5006	4.33212	2.55476e-204	1.19235e-201	0.679201	0.0704541
cDC2-CD1A	CST7	25.0601	3.08835	1.35386e-138	2.48427e-136	0.615746	0.111577
cDC2-CD1A	ASB2	24.8319	3.79308	4.05803e-136	7.02595e-134	0.568743	0.069772
cDC2-CD1A	AFF3	24.7631	3.15188	2.23766e-135	3.78271e-133	0.59577	0.0969597
cDC2-CD1A	AL138899.1	24.2596	3.16854	5.23184e-130	8.38227e-128	0.59342	0.104561
cDC2-CD1A	CD207	23.996	5.39612	3.05938e-127	4.72531e-125	0.514689	0.0243617
cDC2-CD1A	CCR6	23.5577	3.75418	1.04686e-122	1.49834e-120	0.540541	0.0642175
cDC2-CD1A	HIC1	23.5463	2.80716	1.36878e-122	1.94611e-120	0.60282	0.145098
cDC2-CD1A	CACNA2D3	23.3951	2.39945	4.7974e-121	6.60227e-119	0.635723	0.168778
cDC2-CD1A	PON2	22.6989	2.18335	4.59714e-114	5.57605e-112	0.639248	0.186318
cDC2-CD1A	CD1A	22.2565	4.43249	9.7532e-110	1.138e-107	0.498237	0.0509647
cDC2-CD1A	SEL1L3	22.1456	2.3182	1.1512e-108	1.30079e-106	0.609871	0.168486
cDC2-CD1A	ADAM19	21.9516	2.42591	8.35408e-107	9.24504e-105	0.59342	0.14198
cDC2-CD1A	TLR10	21.7365	2.82761	9.27921e-105	9.91121e-103	0.542891	0.10154
cDC2-CD1A	PARM1	20.9508	3.2826	1.84701e-97	1.83581e-95	0.497062	0.0732801
cDC2-CD1A	MCOLN2	20.5194	3.00811	1.44497e-93	1.34878e-91	0.498237	0.0818554
cDC2-CD1A	PPP1R14A	20.3282	4.23415	7.2434e-92	6.61738e-90	0.453584	0.0409277
cDC2-CD1A	C12orf75	19.0867	2.79874	3.25949e-81	2.64068e-79	0.500588	0.121321
cDC2-CD1A	NET1	19.0426	2.72255	7.56102e-81	6.057e-79	0.484136	0.0980316
cDC2-CD1A	TMEM97	18.4731	2.93083	3.398e-76	2.51557e-74	0.455934	0.0839992
cDC2-CD1A	AFDN	17.741	2.03106	2.02439e-70	1.40653e-68	0.511163	0.150848
cDC2-CD1A	GHRL	17.5395	2.30263	7.15563e-69	4.83095e-67	0.46886	0.109335
cDC2-CD1A	P2RY14	17.4246	2.91356	5.36533e-68	3.54426e-66	0.415981	0.0521341
cDC2-CD1A	PALD1	17.1609	1.95883	5.20903e-66	3.33829e-64	0.500588	0.147827
cDC2-CD1A	BATF3	16.9493	1.87091	1.94719e-64	1.21172e-62	0.509988	0.160398
cDC2-CD1A	HLA-DQB2	16.9083	4.17398	3.90719e-64	2.41044e-62	0.381904	0.0379068
cDC2-CD1A	GRASP	16.8407	2.3215	1.22685e-63	7.48272e-62	0.46651	0.125219
cDC2-CD1A	TMEM156	16.5314	2.32855	2.18157e-61	1.27272e-59	0.437133	0.0977392
cDC2-CD1A	GPR82	16.379	1.95687	2.70365e-60	1.53558e-58	0.501763	0.180277
cDC2-CD1A	CLECL1	15.9441	1.69224	3.13229e-57	1.68539e-55	0.505288	0.179205
cDC2-FCN1	CACNA2D3	10.8874	1.99329	1.32412e-27	2.96119e-25	0.6	0.196178
cDC2-FCN1	CD2	8.99374	3.17135	2.38963e-19	4.23992e-17	0.4	0.0597262
cDC2-FCN1	FLT3	7.56117	2.2729	3.99462e-14	5.42788e-12	0.378261	0.0862814
cDC2-FCN1	SLC38A1	6.82088	1.88973	9.04868e-12	1.05009e-09	0.373913	0.111642
cDC2-FCN1	AFF3	6.15741	1.64303	7.39451e-10	6.87241e-08	0.365217	0.130295
cDC2-FCN1	ENHO	6.01569	2.38837	1.79122e-09	1.59567e-07	0.3	0.0727741
cDC2-FCN1	AC009093.2	5.57413	1.42674	2.48771e-08	1.88058e-06	0.365217	0.153818
cDC2-FCN1	MAP4K1	5.26246	1.73983	1.42142e-07	9.41866e-06	0.304348	0.108242
cDC2-FCN1	UPK3A	5.19185	2.33408	2.0821e-07	1.316e-05	0.26087	0.0638611
cDC2-FCN1	CLIC2	4.94599	1.13985	7.5758e-07	4.32566e-05	0.365217	0.173665
cDC1-CLEC9A	CLEC9A	17.9848	8.44519	2.5614e-72	9.1651e-69	0.916031	0.017301
cDC1-CLEC9A	DNASE1L3	17.717	7.97746	3.09755e-70	7.38903e-67	0.908397	0.0260426
cDC1-CLEC9A	IDO1	17.4507	6.92505	3.39751e-68	6.07843e-65	0.900763	0.0286833
cDC1-CLEC9A	RGCC	17.2462	4.7959	1.19534e-66	1.60392e-63	0.938931	0.163905
cDC1-CLEC9A	CLNK	17.1581	6.5998	5.46896e-66	6.90666e-63	0.885496	0.034511
cDC1-CLEC9A	BATF3	17.0152	4.20239	6.33551e-65	6.80085e-62	0.923664	0.178383
cDC1-CLEC9A	CADM1	16.2356	4.3645	2.82688e-59	1.89657e-56	0.885496	0.155163
cDC1-CLEC9A	HLA-DOB	16.1881	5.49186	6.12257e-59	3.86604e-56	0.847328	0.0480787
cDC1-CLEC9A	SLAMF7	15.9833	4.01618	1.66928e-57	9.43099e-55	0.885496	0.14806
cDC1-CLEC9A	ASB2	15.938	4.9028	3.45092e-57	1.89969e-54	0.854962	0.0990712
cDC1-CLEC9A	ENPP1	15.7394	6.80193	8.11834e-56	4.25104e-53	0.80916	0.0196685
cDC1-CLEC9A	CCND1	15.6212	4.12002	5.22285e-55	2.60766e-52	0.877863	0.186669
cDC1-CLEC9A	NET1	15.4844	4.17892	4.421e-54	2.06336e-51	0.854962	0.118922
cDC1-CLEC9A	RAB7B	15.48	5.06815	4.7368e-54	2.16371e-51	0.824427	0.0619195
cDC1-CLEC9A	BTLA	15.3171	6.87018	5.87895e-53	2.42722e-50	0.78626	0.0112001
cDC1-CLEC9A	FLT3	15.1324	4.17153	9.90301e-52	3.72996e-49	0.832061	0.0835003
cDC1-CLEC9A	XCR1	14.8281	8.52964	9.64096e-50	3.13609e-47	0.755725	0.00928793
cDC1-CLEC9A	VAC14	14.3186	3.21016	1.67376e-46	4.54861e-44	0.832061	0.181206
cDC1-CLEC9A	GCSAM	14.1562	7.13337	1.71041e-45	4.47814e-43	0.725191	0.0104717
cDC1-CLEC9A	TMEM14A	14.052	4.59534	7.48644e-45	1.93646e-42	0.755725	0.0675651
cDC1-CLEC9A	TLR10	13.9186	3.56206	4.88703e-44	1.22e-41	0.801527	0.12739
cDC1-CLEC9A	ZNF366	13.8182	4.95649	1.97913e-43	4.66923e-41	0.732824	0.0513568
cDC1-CLEC9A	P2RY14	13.6943	3.95402	1.09762e-42	2.5069e-40	0.763359	0.0718448
cDC1-CLEC9A	FKBP1B	13.6833	4.42266	1.27772e-42	2.88751e-40	0.740458	0.0646512
cDC1-CLEC9A	CD226	13.1458	3.28588	1.79875e-39	3.30062e-37	0.778626	0.155072
cDC1-CLEC9A	CCSER1	13.0809	4.70029	4.23354e-39	7.70253e-37	0.70229	0.0518121
cDC1-CLEC9A	SNX22	12.9828	7.53401	1.53168e-38	2.7403e-36	0.664122	0.00801311
cDC1-CLEC9A	DBN1	12.7995	5.92618	1.65066e-37	2.8579e-35	0.664122	0.0170279
cDC1-CLEC9A	PTK2	12.5151	3.43092	6.17553e-36	9.14361e-34	0.725191	0.10845
cDC1-CLEC9A	SERPINF2	12.3672	4.11175	3.93291e-35	5.48284e-33	0.679389	0.0646512
cDC1-CLEC9A	C1orf21	12.3365	3.72457	5.75837e-35	7.9759e-33	0.694656	0.0863231
cDC1-CLEC9A	GPR171	12.1023	5.52227	1.0271e-33	1.32837e-31	0.633588	0.0236751
cDC1-CLEC9A	EGLN3	11.9242	4.07494	8.85577e-33	1.08025e-30	0.656489	0.0496267
cDC1-CLEC9A	TACSTD2	11.7107	4.43417	1.12373e-31	1.28326e-29	0.641221	0.0611
cDC1-CLEC9A	DPP4	11.6389	5.16561	2.61475e-31	2.89361e-29	0.610687	0.0207612
cDC1-CLEC9A	GNAO1	11.5449	5.52496	7.83099e-31	8.53419e-29	0.603053	0.0197596
cDC1-CLEC9A	EHF	11.3725	4.53494	5.73504e-30	5.97697e-28	0.610687	0.0388818
cDC1-CLEC9A	PAWR	11.3701	4.80427	5.89382e-30	6.11277e-28	0.603053	0.0259516
cDC1-CLEC9A	SLC38A1	11.2768	2.65089	1.70918e-29	1.73907e-27	0.70229	0.110089
cDC1-CLEC9A	AP3M2	11.2688	3.1452	1.87149e-29	1.89523e-27	0.664122	0.104717
cDC1-CLEC9A	PLCD1	11.2434	4.26721	2.49591e-29	2.50396e-27	0.610687	0.046986
cDC1-CLEC9A	MCOLN2	11.0916	3.03292	1.3774e-28	1.32608e-26	0.664122	0.107175
cDC1-CLEC9A	CLIC2	11.0032	2.62178	3.68949e-28	3.45894e-26	0.709924	0.17128
cDC1-CLEC9A	DAPK2	10.8817	3.29051	1.40899e-27	1.27635e-25	0.625954	0.0808596
cDC1-CLEC9A	CLCN4	10.8749	5.12987	1.51891e-27	1.36441e-25	0.572519	0.0211255
cDC1-CLEC9A	ADAM19	10.8222	2.74282	2.70078e-27	2.36665e-25	0.694656	0.17037
cDC1-CLEC9A	AUTS2	10.8011	3.63788	3.40271e-27	2.9576e-25	0.603053	0.0522673
cDC1-CLEC9A	RUBCNL	10.6656	2.8265	1.47469e-26	1.22111e-24	0.656489	0.123384
cDC1-CLEC9A	LRRCC1	10.5297	3.26853	6.3024e-26	4.97449e-24	0.618321	0.105263
cDC1-CLEC9A	AIM2	10.4551	3.28351	1.38885e-25	1.05636e-23	0.610687	0.0868694
cDC1-CLEC9A	KIF16B	10.4409	2.54104	1.61344e-25	1.2154e-23	0.671756	0.161901
cDC1-CLEC9A	NUBPL	10.4029	3.03432	2.40562e-25	1.75668e-23	0.618321	0.0962484
cDC1-CLEC9A	MAP2K6	10.2958	2.50404	7.35841e-25	5.23105e-23	0.664122	0.143416
cDC1-CLEC9A	CCDC126	10.2799	2.87341	8.6845e-25	6.13314e-23	0.633588	0.125023
cDC1-CLEC9A	PNMA1	10.0626	3.10719	8.08043e-24	5.35428e-22	0.603053	0.109088
cDC1-CLEC9A	CXCR3	9.921	4.7722	3.37351e-23	2.20139e-21	0.526718	0.0240393
cDC1-CLEC9A	CBFA2T3	9.90252	2.13506	4.05899e-23	2.62477e-21	0.70229	0.183755
cDC1-CLEC9A	NFATC2	9.83389	2.18301	8.0454e-23	5.15602e-21	0.664122	0.160991
cDC1-CLEC9A	PLEKHA5	9.70576	2.71035	2.84956e-22	1.77841e-20	0.59542	0.0989801
cDC1-CLEC9A	MAGEF1	9.67328	2.33178	3.91626e-22	2.40912e-20	0.648855	0.167911
cDC1-CLEC9A	MYEF2	9.51632	4.48877	1.79427e-21	1.05537e-19	0.51145	0.0302313
cDC1-CLEC9A	SEL1L3	9.40647	2.12995	5.13059e-21	2.96897e-19	0.664122	0.196777
cDC1-CLEC9A	NCALD	9.32037	6.12482	1.15935e-20	6.46497e-19	0.480916	0.00810417
cDC1-CLEC9A	SERPINF1	9.30178	2.14837	1.38111e-20	7.66177e-19	0.656489	0.189492
cDC1-CLEC9A	LINC02206	9.29113	4.58302	1.52666e-20	8.42565e-19	0.496183	0.0244036
cDC1-CLEC9A	MAP4K1	9.27674	2.54931	1.74739e-20	9.57007e-19	0.587786	0.106629
cDC1-CLEC9A	TMEM238	9.27532	2.60605	1.7709e-20	9.67415e-19	0.580153	0.112821
cDC1-CLEC9A	ZEB1	9.18375	3.08672	4.16339e-20	2.22348e-18	0.534351	0.0663814
cDC1-CLEC9A	MTERF2	9.17097	3.91003	4.68787e-20	2.48503e-18	0.503817	0.0386086
cDC1-CLEC9A	HIC1	9.0275	2.23994	1.75641e-19	9.02112e-18	0.625954	0.174832
cDC1-CLEC9A	GNG7	9.01866	2.75066	1.90398e-19	9.70939e-18	0.549618	0.0912402
mDC-LAMP3	LAMP3	10.468	8.33151	1.21159e-25	3.80716e-22	0.846154	0.025947
mDC-LAMP3	GPR157	10.1118	6.58978	4.89641e-24	7.08442e-21	0.826923	0.0456559
mDC-LAMP3	FSCN1	10.024	5.55368	1.19563e-23	1.351e-20	0.846154	0.13751
mDC-LAMP3	CCR7	9.56097	9.98342	1.16661e-21	6.95723e-19	0.769231	0.0070518
mDC-LAMP3	DUSP5	9.41526	5.44483	4.71917e-21	2.59784e-18	0.788462	0.0933912
mDC-LAMP3	CST7	9.38328	4.47951	6.39493e-21	3.43232e-18	0.826923	0.147003
mDC-LAMP3	DUSP4	9.02233	4.83103	1.84133e-19	7.18756e-17	0.769231	0.0716029
mDC-LAMP3	IL7R	8.85153	4.84423	8.63244e-19	2.89578e-16	0.788462	0.153332
mDC-LAMP3	LAD1	8.84341	9.5077	9.28405e-19	3.06645e-16	0.711538	0.00415876
mDC-LAMP3	MGLL	8.80429	3.44742	1.31688e-18	4.15766e-16	0.826923	0.199078
mDC-LAMP3	TBC1D4	8.59101	3.93869	8.6208e-18	2.40364e-15	0.769231	0.172498
mDC-LAMP3	NET1	8.30111	3.72423	1.03143e-16	2.23058e-14	0.75	0.124672
mDC-LAMP3	MREG	8.28317	5.18049	1.19936e-16	2.54941e-14	0.692308	0.0473737
mDC-LAMP3	CCL22	8.27262	8.45374	1.31043e-16	2.71897e-14	0.673077	0.0193473
mDC-LAMP3	MAP3K14	8.16955	3.68248	3.09545e-16	5.8295e-14	0.75	0.193111
mDC-LAMP3	ETV3	7.91301	3.47269	2.51238e-15	4.15126e-13	0.730769	0.197541
mDC-LAMP3	SLCO5A1	7.87085	8.3759	3.52229e-15	5.72879e-13	0.634615	0.00524365
mDC-LAMP3	NR4A3	7.8561	4.12444	3.96275e-15	6.25562e-13	0.692308	0.0765754
mDC-LAMP3	TRAF1	7.68171	4.82449	1.56978e-14	2.1743e-12	0.653846	0.0664497
mDC-LAMP3	IL32	7.60502	4.75102	2.84855e-14	3.75187e-12	0.653846	0.0686195
mDC-LAMP3	NMRK1	7.60101	4.2149	2.93818e-14	3.84613e-12	0.692308	0.174216
mDC-LAMP3	IDO1	7.5758	5.74834	3.56926e-14	4.47601e-12	0.634615	0.0361631
mDC-LAMP3	CLIC2	7.43774	3.08869	1.02424e-13	1.18862e-11	0.711538	0.17512
mDC-LAMP3	SOCS1	7.33644	3.56192	2.19351e-13	2.46557e-11	0.673077	0.127656
mDC-LAMP3	TSPAN13	7.33215	5.12238	2.26489e-13	2.52391e-11	0.615385	0.0358919
mDC-LAMP3	GRASP	7.33191	2.94144	2.26892e-13	2.52391e-11	0.711538	0.148721
mDC-LAMP3	TBC1D8	7.30498	3.01054	2.77299e-13	3.03742e-11	0.711538	0.181358
mDC-LAMP3	P2RY10	7.19082	4.37603	6.44042e-13	6.61576e-11	0.615385	0.0581322
mDC-LAMP3	TRIP10	7.09494	4.01325	1.29411e-12	1.26865e-10	0.634615	0.0991773
mDC-LAMP3	HIVEP1	7.01413	3.08328	2.31382e-12	2.14118e-10	0.673077	0.143025
mDC-LAMP3	IRF4	6.92109	4.06338	4.48191e-12	3.89563e-10	0.615385	0.0904077
mDC-LAMP3	P2RY8	6.88333	2.97767	5.84703e-12	4.96165e-10	0.673077	0.137962
mDC-LAMP3	ANKRD33B	6.87362	7.16832	6.25917e-12	5.29047e-10	0.557692	0.00913118
mDC-LAMP3	ZDHHC18	6.60662	2.71184	3.9319e-11	2.89089e-09	0.673077	0.199982
mDC-LAMP3	PTGIR	6.46163	2.46228	1.03582e-10	7.22016e-09	0.692308	0.198535
mDC-LAMP3	RAB30	6.44265	5.15213	1.17404e-10	8.10468e-09	0.538462	0.0325468
mDC-LAMP3	SLC7A11	6.18052	4.15816	6.38892e-10	3.8967e-08	0.538462	0.0482777
mDC-LAMP3	MCOLN2	6.14911	3.47614	7.7918e-10	4.69893e-08	0.576923	0.111563
mDC-LAMP3	LIMCH1	6.11059	6.44322	9.92607e-10	5.91114e-08	0.5	0.0147365
mDC-LAMP3	ADAM19	6.07652	3.04223	1.2282e-09	7.24403e-08	0.615385	0.174487
mDC-LAMP3	FLT3	6.07489	3.62389	1.2407e-09	7.29771e-08	0.557692	0.0901365
mDC-LAMP3	ASMTL	5.99101	2.66175	2.08539e-09	1.16592e-07	0.615385	0.175301
mDC-LAMP3	SLC41A2	5.87771	2.88777	4.15973e-09	2.20507e-07	0.576923	0.131905
mDC-LAMP3	TVP23A	5.79411	5.37855	6.86828e-09	3.52764e-07	0.480769	0.0229636
mDC-LAMP3	PPP1R16B	5.71199	4.00798	1.11664e-08	5.54934e-07	0.5	0.051442
mDC-LAMP3	SPIB	5.6963	5.09485	1.22433e-08	6.00116e-07	0.480769	0.0333605
mDC-LAMP3	TIFAB	5.63326	4.33561	1.76831e-08	8.47409e-07	0.5	0.0763041
mDC-LAMP3	TTYH2	5.61123	2.43819	2.00892e-08	9.43752e-07	0.596154	0.162372
mDC-LAMP3	AC058791.1	5.56888	2.89864	2.56383e-08	1.17865e-06	0.557692	0.138505
mDC-LAMP3	CD274	5.54102	4.09018	3.00714e-08	1.34501e-06	0.480769	0.0436669
mDC-LAMP3	CALCRL	5.52737	4.29503	3.25062e-08	1.44189e-06	0.480769	0.0459271
mDC-LAMP3	ADAM12	5.51533	4.94711	3.48131e-08	1.53471e-06	0.461538	0.0209746
mDC-LAMP3	AUTS2	5.47345	4.22845	4.41352e-08	1.92198e-06	0.480769	0.0567761
mDC-LAMP3	CCL19	5.44174	7.72362	5.27635e-08	2.28383e-06	0.442308	0.00759425
mDC-LAMP3	TRAF5	5.38082	2.64597	7.41475e-08	3.11708e-06	0.538462	0.130006
mDC-LAMP3	AOC1	5.23331	8.64053	1.66498e-07	6.53482e-06	0.423077	0.00479161
mDC-LAMP3	WNT5B	5.20686	4.69798	1.9206e-07	7.48338e-06	0.442308	0.0329084
mDC-LAMP3	CD200	5.19657	6.63819	2.02997e-07	7.88089e-06	0.423077	0.00795588
mDC-LAMP3	HLX	5.14989	2.17525	2.60642e-07	9.90395e-06	0.576923	0.193111
mDC-LAMP3	SLC22A23	5.10065	4.04948	3.38495e-07	1.25947e-05	0.442308	0.0335413
mDC-LAMP3	AFDN	4.98397	2.13468	6.22934e-07	2.20689e-05	0.557692	0.176657
mDC-LAMP3	SYNPO	4.98126	7.07675	6.31716e-07	2.23064e-05	0.403846	0.00488202
mDC-LAMP3	BCL2L14	4.96237	6.89912	6.96384e-07	2.43921e-05	0.403846	0.00777507
mDC-LAMP3	HOMER2	4.95851	3.63381	7.10347e-07	2.48378e-05	0.442308	0.0533406
mDC-LAMP3	TMEM136	4.87301	5.26592	1.09912e-06	3.71022e-05	0.403846	0.0154597
mDC-LAMP3	ARNTL2	4.84758	4.08624	1.2498e-06	4.17942e-05	0.423077	0.0451135
mDC-LAMP3	GCSAM	4.84489	5.19933	1.26683e-06	4.22978e-05	0.403846	0.0170871
mDC-LAMP3	SLAMF7	4.78583	2.53498	1.70278e-06	5.53895e-05	0.519231	0.155049
mDC-LAMP3	SOCS2	4.77877	4.04712	1.76369e-06	5.71111e-05	0.423077	0.0512612
mDC-LAMP3	MMP25	4.73577	2.9788	2.18225e-06	6.93057e-05	0.442308	0.0624717
pDC	PLD4	21.9368	7.67016	1.15732e-106	3.04802e-102	0.976471	0.0440029
pDC	LILRA4	21.2246	11.5174	5.6656e-100	1.65794e-96	0.941176	0.00250432
pDC	JCHAIN	21.1844	8.56454	1.3304e-99	3.50387e-96	0.947059	0.0279132
pDC	SPIB	20.7309	8.23326	1.82356e-95	4.00226e-92	0.923529	0.0177297
pDC	MZB1	20.3894	6.39929	2.07795e-92	3.90906e-89	0.923529	0.0435154
pDC	DERL3	20.3159	7.01158	9.3017e-92	1.44105e-88	0.911765	0.0410997
pDC	CLEC4C	19.7677	12.0318	5.64556e-87	7.08034e-84	0.876471	0.000941891
pDC	SMPD3	19.4232	6.8965	4.91318e-84	4.79253e-81	0.870588	0.0316475
pDC	FAM129C	19.0898	7.68725	3.07138e-81	2.37915e-78	0.852941	0.0100949
pDC	SCT	18.8194	10.0719	5.23951e-79	3.53828e-76	0.835294	0.00431054
pDC	AC119428.2	18.7545	8.15303	1.77868e-78	1.14256e-75	0.835294	0.00882053
pDC	PACSIN1	18.6444	6.95951	1.40237e-77	8.79383e-75	0.835294	0.0245778
pDC	ZFAT	18.216	6.25174	3.85314e-74	2.11417e-71	0.823529	0.0495878
pDC	IGHM	17.851	5.26741	2.83975e-71	1.33554e-68	0.817647	0.0217189
pDC	DNASE1L3	17.5626	6.43459	4.76621e-69	1.9312e-66	0.794118	0.0217411
pDC	LRRC26	15.9274	5.88292	4.09103e-57	1.05633e-54	0.723529	0.0288329
pDC	PTCRA	15.8977	9.77006	6.57434e-57	1.68105e-54	0.705882	0.00298081
pDC	SCN9A	15.8805	7.06238	8.65216e-57	2.19108e-54	0.711765	0.0112805
pDC	WDFY4	14.7074	4.88402	5.77893e-49	1.14436e-46	0.682353	0.0433713
pDC	PHEX	14.1865	7.08597	1.1103e-45	1.89883e-43	0.635294	0.0100838
pDC	GRAMD1B	14.1823	4.90954	1.17905e-45	1.99056e-43	0.658824	0.0383737
pDC	MCOLN2	13.6157	4.51923	3.2286e-42	4.64654e-40	0.641176	0.0492332
pDC	FUT7	13.5819	6.64852	5.12806e-42	7.30042e-40	0.611765	0.0129649
pDC	IRF4	13.5773	5.19368	5.46067e-42	7.73213e-40	0.629412	0.0362351
pDC	SMIM5	13.4921	5.58168	1.74189e-41	2.42731e-39	0.617647	0.038407
pDC	TLR7	13.3842	4.84415	7.4792e-41	1.005e-38	0.623529	0.0402575
pDC	AL096865.1	13.299	5.28882	2.34653e-40	3.09003e-38	0.611765	0.0284119
pDC	ARMH1	12.8229	4.49127	1.22082e-37	1.42269e-35	0.605882	0.0459754
pDC	CUX2	12.8027	7.94814	1.58255e-37	1.82806e-35	0.570588	0.00552945
pDC	EPHB1	12.3856	7.65396	3.12595e-35	3.25407e-33	0.552941	0.00575107
pDC	PPM1J	12.3448	6.0427	5.19425e-35	5.32669e-33	0.558824	0.0181951
pDC	SHD	12.335	11.2574	5.87172e-35	5.99394e-33	0.547059	0.000476486
pDC	SCAMP5	12.2446	5.65056	1.79572e-34	1.79143e-32	0.558824	0.025154
pDC	PLXNA4	12.143	5.2531	6.24697e-34	6.11622e-32	0.558824	0.0247994

## Sheet: lymphocytes
Supplementary Table 2. Markers genes expressed by each cell subpopulation
cluster	gene	score	logfc	pval	pval_fdr	in_group_fraction	out_group_fraction
NK1	ITGAX	76.5152	5.07782	0	0	0.910278	0.0983641
NK1	NCAM1	71.4796	4.14583	0	0	0.88316	0.127347
NK1	LINC00996	62.9052	4.45511	0	0	0.768329	0.065541
NK1	SRGAP3	59.3527	3.79708	0	0	0.756612	0.117301
NK1	EPAS1	57.5645	3.99436	0	0	0.718112	0.0930514
NK1	AFAP1L2	57.1319	5.65939	0	0	0.667894	0.0311925
NK1	DAPK2	56.7378	4.05985	0	0	0.706729	0.0897901
NK1	MCTP2	53.6052	2.83398	0	0	0.758955	0.195203
NK1	KLRC2	53.3252	3.3114	0	0	0.710077	0.111462
NK1	ZFHX3	51.6419	3.97413	0	0	0.64312	0.064752
NK1	SLC16A3	51.2087	2.90446	0	0	0.706729	0.159171
NK1	FGR	50.4382	2.90929	0	0	0.69836	0.14581
NK1	UBASH3B	49.8473	3.84362	0	0	0.628055	0.0830572
NK1	ABHD2	49.2597	3.14414	0	0	0.661868	0.136132
NK1	ITGAD	48.8675	6.67598	0	0	0.563776	0.0116248
NK1	BHLHE40	48.129	2.64429	0	0	0.694677	0.187733
NK1	ATP8B4	47.8973	3.51511	0	0	0.617007	0.0771659
NK1	CD300A	47.1665	2.50566	0	0	0.698025	0.182842
NK1	TESC	46.4899	3.16367	0	0	0.620355	0.113092
NK1	SLC44A1	46.0496	3.53877	0	0	0.593907	0.0902109
NK1	SLFN13	44.093	2.82686	0	0	0.617677	0.134554
NK1	HAVCR2	43.1396	2.79189	0	0	0.608637	0.133554
NK1	ADGRG3	42.7967	4.03492	0	0	0.528289	0.0426069
NK1	RNF130	42.3243	2.74892	0	0	0.594576	0.129083
NK1	MYO1E	41.2725	4.29698	0	0	0.502511	0.0393982
NK1	GFOD1	41.0798	2.78969	0	0	0.57382	0.112409
NK1	SPINK2	40.4317	5.16483	0	0	0.492133	0.0500237
NK1	KRT81	40.236	2.61833	0	0	0.575494	0.10899
NK1	SLC12A8	39.8972	6.64442	0	0	0.459659	0.00720635
NK1	NDFIP2	38.5284	2.48649	0	0	0.561098	0.126716
NK1	DPF3	37.1849	4.27262	1.19575e-302	1.56599e-300	0.452628	0.0324023
NK1	SYK	36.8424	2.84502	3.86688e-297	4.97432e-295	0.508872	0.095471
NK1	KIR2DL3	36.6764	4.06401	1.73944e-294	2.19857e-292	0.452293	0.0381358
NK1	BCO2	36.4769	3.15405	2.57748e-291	3.23898e-289	0.48008	0.0630161
NK1	PIK3R6	35.513	4.29754	3.10009e-276	3.76514e-274	0.429863	0.0263532
NK1	SH2D1B	35.4269	2.34974	6.58127e-275	7.94871e-273	0.521594	0.110462
NK1	COX6A2	35.3777	5.40636	3.76406e-274	4.44732e-272	0.413124	0.010415
NK1	SYNGR1	35.3576	2.73836	7.67206e-274	9.0157e-272	0.500167	0.109726
NK1	B3GNT7	35.2197	3.71154	9.99391e-272	1.16186e-269	0.439571	0.0383988
NK1	GOLIM4	34.447	2.87199	4.9869e-260	5.50331e-258	0.470372	0.0823734
NK1	APOBR	33.31	2.33391	2.76504e-243	2.94666e-241	0.501507	0.126295
NK1	CCR1	33.2424	2.83848	2.62555e-242	2.78436e-240	0.452628	0.0740624
NK1	ATP10A	33.1631	2.7786	3.67085e-241	3.85528e-239	0.45765	0.0830572
NK1	KRT86	33.1263	2.27835	1.245e-240	1.30126e-238	0.494476	0.108201
NK1	CD59	33.0474	2.28375	1.69465e-239	1.75436e-237	0.507533	0.152333
NK1	UBE2F	32.9299	2.27526	8.2196e-238	8.42897e-236	0.514898	0.165957
NK1	NCR1	32.3086	2.18036	5.29474e-229	5.3045e-227	0.490459	0.113987
NK1	SFMBT2	31.8246	2.28188	2.96054e-222	2.87331e-220	0.482089	0.123244
NK1	KIR2DL4	31.7473	3.03134	3.45721e-221	3.34043e-219	0.417811	0.0528641
NK1	ERMP1	31.7303	3.05585	5.93663e-221	5.71073e-219	0.421493	0.0620167
NK1	B4GALNT1	31.5682	5.63614	1.00908e-218	9.62168e-217	0.366923	0.00794277
NK1	CSF1	31.4497	2.98849	4.23812e-217	4.02344e-215	0.425176	0.0718531
NK1	PPFIBP1	31.2246	3.23968	4.94755e-214	4.59657e-212	0.405089	0.0495503
NK1	GSN	31.135	2.41602	8.10245e-213	7.49563e-211	0.45698	0.107727
NK1	CLNK	31.1135	2.59342	1.57968e-212	1.45518e-210	0.437228	0.0805323
NK1	FAM49A	31.0979	2.87466	2.571e-212	2.35837e-210	0.420489	0.0660144
NK1	GCNT1	30.4938	2.63642	3.14593e-204	2.8145e-202	0.42618	0.0763768
NK1	GABARAPL1	30.486	1.71595	3.99264e-204	3.55738e-202	0.540007	0.187681
NK1	CAMK1	30.3626	3.02063	1.71262e-202	1.51351e-200	0.403415	0.0592289
NK1	FNDC3B	30.2528	2.36334	4.79784e-201	4.1722e-199	0.451289	0.113355
NK1	TGFBR1	29.6926	1.83628	9.56752e-194	8.0933e-192	0.507533	0.177844
NK1	CLEC12A	29.6376	3.37172	4.89689e-193	4.1263e-191	0.37931	0.0419231
NK1	SPRY2	29.5382	2.93097	9.29696e-192	7.77369e-190	0.390358	0.0499711
NK1	SEPT11	28.9711	1.69193	1.51989e-184	1.23293e-182	0.517911	0.19231
NK1	STYK1	28.8426	4.18973	6.27318e-183	5.03243e-181	0.349849	0.0217243
NK1	GAS7	28.7716	3.14546	4.86679e-182	3.8756e-180	0.373619	0.0440797
NK1	AUTS2	28.6243	1.63908	3.35381e-180	2.66102e-178	0.51925	0.189311
NK1	RIN3	28.2023	1.77823	5.47929e-175	4.30035e-173	0.484098	0.160223
NK1	ARHGEF12	28.0281	2.27821	7.39676e-173	5.74305e-171	0.422832	0.10678
NK1	CCL3	27.9538	1.50581	5.9279e-172	4.56995e-170	0.522263	0.188049
NK1	B4GALT5	27.9507	2.60104	6.47209e-172	4.97184e-170	0.392367	0.074904
NK1	ID3	27.5401	1.91921	5.80677e-167	4.38331e-165	0.461332	0.15328
NK1	FOSL2	27.3931	1.88181	3.31441e-165	2.49326e-163	0.462337	0.153017
NK1	CYP26A1	26.9854	6.7115	2.19391e-160	1.60591e-158	0.310345	0.00378728
NK1	HIPK2	26.9328	1.66959	9.08031e-160	6.62436e-158	0.484098	0.18058
NK1	SNX18	26.4996	2.00364	9.80588e-155	6.94397e-153	0.417141	0.111935
NK1	ENTPD1	26.3276	2.88453	9.26909e-153	6.45866e-151	0.372615	0.086108
NK1	RAB3GAP1	26.3029	1.971	1.7766e-152	1.23004e-150	0.428524	0.134238
NK1	FASLG	26.277	1.41164	3.50982e-152	2.42233e-150	0.51222	0.196939
NK1	KIR3DX1	26.1762	5.14134	4.96615e-151	3.41659e-149	0.307332	0.00973121
NK1	KIR2DL1	26.0313	3.26737	2.18887e-149	1.50113e-147	0.335788	0.0393456
NK1	CHST2	26.0253	2.14928	2.56348e-149	1.75252e-147	0.396719	0.0995739
NK1	GOLGA8N	25.6488	3.17458	4.36558e-145	2.91128e-143	0.33311	0.0404503
NK1	GSE1	25.5964	2.07922	1.67126e-144	1.10435e-142	0.400402	0.109042
NK1	DUSP10	25.3822	2.81395	3.9675e-142	2.60584e-140	0.341815	0.0518647
NK1	NUDT14	25.1381	1.67828	1.90573e-139	1.23673e-137	0.441915	0.154121
NK1	MZB1	25.0786	1.70584	8.51098e-139	5.50681e-137	0.389019	0.0979433
NK1	CATSPER1	24.8892	3.53896	9.72997e-137	6.23981e-135	0.31068	0.0258798
NK1	CD9	24.8674	1.63491	1.67781e-136	1.07281e-134	0.439571	0.153385
NK1	CLPTM1	24.6446	1.92482	4.19973e-134	2.63879e-132	0.401071	0.121456
NK1	TSPAN5	24.3606	1.57254	4.47946e-131	2.76658e-129	0.439571	0.157698
NK1	CD151	24.051	1.8439	8.14577e-128	4.87849e-126	0.397389	0.122192
NK1	ERI1	23.7488	2.58013	1.13051e-124	6.66052e-123	0.33311	0.063174
NK1	IL18	23.6154	2.90663	2.67979e-123	1.56609e-121	0.31068	0.0393982
NK1	RASSF8	23.5714	4.3631	7.56755e-123	4.39889e-121	0.283897	0.0162011
NK1	NMUR1	23.529	1.63198	2.06062e-122	1.19144e-120	0.404419	0.125874
NK1	IRF2BPL	23.3735	1.80667	7.95707e-121	4.55228e-119	0.396384	0.13124
NK1	KSR1	23.2905	3.19796	5.52771e-120	3.14587e-118	0.299632	0.0336647
NK1	ZMIZ1	23.2731	2.26432	8.29468e-120	4.70826e-118	0.342149	0.0752196
NK1	CDKN2A	23.2668	2.17424	9.62034e-120	5.44652e-118	0.34918	0.0822156
NK1	MEF2A	23.1309	1.55646	2.26348e-118	1.26175e-116	0.435554	0.177108
NK1	PPFIA1	23.126	1.76131	2.53364e-118	1.40873e-116	0.394041	0.129662
NK1	JARID2	23.0833	1.45749	6.81114e-118	3.76779e-116	0.447272	0.182736
NK1	CLSTN3	23.0268	1.77426	2.51471e-117	1.37707e-115	0.387345	0.121456
NK1	TNFRSF4	22.8663	1.43991	1.00713e-115	5.41955e-114	0.400067	0.131292
NK1	DRAXIN	22.6804	3.00825	6.98926e-114	3.71507e-112	0.299297	0.0411867
NK1	IRF8	22.6668	1.92488	9.5214e-114	5.04866e-112	0.355206	0.091526
NK1	LIMK1	22.6519	1.89867	1.33658e-113	7.05275e-112	0.366923	0.106885
NK1	MAML3	22.6073	3.2083	3.67489e-113	1.92976e-111	0.290258	0.0321919
NK1	ACP5	22.4916	1.58027	5.01968e-112	2.60448e-110	0.412454	0.157172
NK1	PHLDA1	22.4599	2.1057	1.02404e-111	5.28806e-110	0.338467	0.0798485
NK1	CTBP2	22.4256	1.78134	2.21708e-111	1.14216e-109	0.366254	0.102835
NK2	KRT81	35.2529	2.99969	3.09733e-272	7.48178e-269	0.717969	0.138623
NK2	KRT86	33.4718	2.92449	1.24087e-245	2.07512e-242	0.680469	0.128536
NK2	CD9	28.037	2.64081	5.75485e-173	5.95764e-170	0.603125	0.16686
NK2	LAT2	21.9306	1.90353	1.32573e-106	7.58459e-104	0.535156	0.179409
NK2	IGFBP2	20.6952	2.34146	3.82262e-95	1.88872e-92	0.467187	0.136838
NK2	SRGAP3	19.4476	1.56673	3.0567e-84	1.27794e-81	0.517188	0.184767
NK2	KIR2DL4	19.2346	2.55695	1.89825e-82	7.50325e-80	0.4	0.0840332
NK2	CLNK	18.204	2.10139	4.79368e-74	1.6542e-71	0.4125	0.111449
NK2	CAPN12	17.8868	1.73642	1.49494e-71	5.07811e-69	0.453906	0.165605
NK2	CD160	17.6736	1.97564	6.69351e-70	2.2048e-67	0.428906	0.13983
NK2	STARD3NL	17.1332	1.70547	8.3973e-66	2.57123e-63	0.450781	0.184477
NK2	LINC00996	16.883	1.73785	6.00272e-64	1.69479e-61	0.426563	0.14456
NK2	KLRC2	16.8712	1.61067	7.3279e-64	2.04242e-61	0.458594	0.17632
NK2	NMUR1	16.0853	1.7042	3.23238e-58	8.36571e-56	0.410938	0.148422
NK2	SH2D1B	15.9943	1.59274	1.40101e-57	3.54162e-55	0.420312	0.150594
NK2	NDFIP2	15.9042	1.67613	5.92765e-57	1.48123e-54	0.422656	0.171059
NK2	ZNF683	15.7213	2.31773	1.08139e-55	2.55537e-53	0.353125	0.0996718
NK2	ABCB1	15.2428	1.44122	1.83821e-52	4.11987e-50	0.427344	0.176417
NK2	ATP8B4	15.2003	1.60733	3.51864e-52	7.72679e-50	0.389062	0.135727
NK2	SPRY2	15.1101	2.30822	1.38986e-51	2.9623e-49	0.328906	0.0818129
NK2	NCR1	14.8323	1.50926	9.06044e-50	1.82383e-47	0.4	0.150594
NK2	ITGAX	14.7187	1.18307	4.89265e-49	9.58255e-47	0.455469	0.193358
NK2	ADGRG3	14.2661	1.82487	3.55866e-46	6.50129e-44	0.334375	0.0946037
NK2	DAPK2	14.2287	1.2466	6.07747e-46	1.09194e-43	0.407813	0.159089
NK2	SPRY1	13.9135	1.40401	5.24308e-44	8.90505e-42	0.397656	0.168163
NK2	BCO2	13.3819	1.85498	7.71398e-41	1.25151e-38	0.325	0.10696
NK2	RNF130	12.7517	1.23474	3.05186e-37	4.45285e-35	0.392188	0.17994
NK2	RIN3	12.6794	1.21572	7.69601e-37	1.10073e-34	0.399219	0.192152
NK2	AKAP5	12.3271	1.77969	6.47734e-35	8.85644e-33	0.302344	0.100251
NK2	GPR82	11.2017	1.27803	4.00161e-29	4.77994e-27	0.344531	0.167005
NK2	TBCD	11.1542	1.13498	6.82987e-29	8.06964e-27	0.367969	0.184912
NK2	ZBTB16	10.8593	1.48504	1.80194e-27	2.051e-25	0.288281	0.106091
NK2	DZIP3	10.6397	1.11698	1.94794e-26	2.09644e-24	0.352344	0.178251
NK2	SERPINE2	10.5295	1.97191	6.31645e-26	6.73136e-24	0.245312	0.0726421
NK2	ZFHX3	10.3708	1.17072	3.36553e-25	3.55178e-23	0.310156	0.132976
NK2	SYNGR1	10.2922	1.12716	7.63711e-25	7.94405e-23	0.326562	0.152621
NK2	AREG	9.99296	1.58542	1.63629e-23	1.63931e-21	0.278125	0.115117
NK2	CCR1	9.89088	1.41671	4.55989e-23	4.42554e-21	0.278125	0.116034
NK2	RAB3GAP1	9.72614	1.12011	2.33281e-22	2.20501e-20	0.322656	0.165026
NK2	MPST	9.72554	1.16847	2.34652e-22	2.20837e-20	0.309375	0.150594
NK2	EPS8L2	9.28475	1.39067	1.62081e-20	1.38182e-18	0.263281	0.110773
NK2	CRIM1	9.26183	1.32877	2.00966e-20	1.70664e-18	0.266406	0.113283
NK2	DOCK5	9.24464	1.84783	2.36025e-20	1.98883e-18	0.213281	0.0586929
NK2	DNMT3A	9.22868	1.05016	2.73983e-20	2.29977e-18	0.314063	0.163674
NK2	NUDT14	9.1111	0.976365	8.15487e-20	6.69007e-18	0.332813	0.184574
NK2	HIP1	9.09565	1.27937	9.40235e-20	7.65056e-18	0.266406	0.115359
NK2	YPEL1	9.05944	0.937448	1.31118e-19	1.05575e-17	0.3375	0.187808
NK2	IL18	9.00212	1.89247	2.21399e-19	1.76956e-17	0.214844	0.0676706
NK2	HIC1	8.97946	1.40757	2.72088e-19	2.13545e-17	0.248438	0.0997683
NK2	NAALADL1	8.91147	1.53202	5.03621e-19	3.86881e-17	0.233594	0.0864948
NK2	KLRC4	8.86822	1.12853	7.43248e-19	5.63004e-17	0.291406	0.144898
NK2	KDM5B	8.69629	1.07459	3.42915e-18	2.50167e-16	0.295312	0.152766
NK2	PELO	8.66255	1.08963	4.61315e-18	3.29901e-16	0.283594	0.141375
NK2	CD151	8.54048	1.08007	1.33666e-17	9.34373e-16	0.290625	0.151462
NK2	EPAS1	8.39813	0.75468	4.53633e-17	3.11103e-15	0.319531	0.169177
NK2	B3GNT7	8.37684	1.51112	5.43678e-17	3.71684e-15	0.223438	0.0848055
NK2	BCAS4	8.297	0.913913	1.0677e-16	7.09839e-15	0.313281	0.179023
NK2	SCCPDH	8.27877	1.42515	1.24452e-16	8.22367e-15	0.23125	0.0959552
NK2	LDLRAD4	8.25377	0.934916	1.53479e-16	1.0111e-14	0.325781	0.19191
NK2	ABCA2	8.13946	1.11423	3.97045e-16	2.56898e-14	0.257812	0.12144
NK3	CD160	34.6476	3.5354	4.85154e-263	1.05472e-259	0.696104	0.126757
NK3	IGFBP2	32.594	3.56053	4.98775e-233	7.74526e-230	0.654545	0.128436
NK3	KRT81	28.6639	2.7655	1.07501e-180	8.98872e-178	0.632035	0.14686
NK3	KRT86	28.0321	2.78906	6.60476e-173	5.12812e-170	0.609524	0.135777
NK3	LAT2	23.258	2.26878	1.18152e-119	5.83777e-117	0.545455	0.180972
NK3	BCO2	17.9612	2.43253	3.92217e-72	1.37529e-69	0.405195	0.103824
NK3	CD9	16.0399	2.01571	6.72668e-58	1.66179e-55	0.425108	0.179341
NK3	KLRF1	15.0999	1.61049	1.62172e-51	3.35773e-49	0.428571	0.161397
NK3	STARD3NL	13.5183	1.63913	1.21997e-41	1.85469e-39	0.393939	0.189224
NK3	SH2D1B	13.0682	1.56596	5.00153e-39	6.97008e-37	0.371429	0.15492
NK3	NMUR1	13.0002	1.71013	1.22067e-38	1.69028e-36	0.360173	0.152809
NK3	CLNK	12.536	1.80572	4.74146e-36	6.17241e-34	0.328139	0.117929
NK3	NCR1	12.4152	1.57307	2.16084e-35	2.74717e-33	0.358442	0.154392
NK3	ABCB1	12.2434	1.49595	1.82323e-34	2.27799e-32	0.370563	0.181068
NK3	CAPN12	12.242	1.50509	1.85396e-34	2.30315e-32	0.363636	0.172336
NK3	TBCD	10.518	1.29178	7.14101e-26	6.55044e-24	0.349784	0.187017
NK3	SPRY1	10.4404	1.34625	1.62165e-25	1.47509e-23	0.339394	0.172768
NK3	C1orf21	10.4133	1.45929	2.1572e-25	1.95406e-23	0.309091	0.133474
NK3	LDB2	9.59208	3.21199	8.63284e-22	6.77537e-20	0.193074	0.0276832
NK3	CCL3L1	9.43108	1.84168	4.05901e-21	3.06399e-19	0.245887	0.0850645
NK3	SPRY2	9.23319	1.84953	2.62681e-20	1.91634e-18	0.242424	0.0880871
NK3	YPEL1	9.06021	1.14714	1.30202e-19	9.37279e-18	0.328139	0.189224
NK3	AC243829.4	9.00056	2.6503	2.24571e-19	1.60071e-17	0.194805	0.0404452
NK3	WIPF3	8.92604	3.45999	4.41514e-19	3.1164e-17	0.174026	0.0189512
NK3	SLC15A4	8.60284	1.28751	7.77679e-18	5.03365e-16	0.290043	0.156599
NK3	ERGIC1	7.98787	1.16197	1.37293e-15	8.00202e-14	0.299567	0.183131
NK3	CCR9	7.94563	3.58607	1.93205e-15	1.12008e-13	0.154113	0.0162645
NK3	TNFRSF1A	7.59737	0.972243	3.02214e-14	1.61032e-12	0.309957	0.195269
NK3	LZTFL1	7.51485	2.2676	5.69755e-14	2.98469e-12	0.182684	0.0569496
NK3	ADGRG3	7.36396	1.3515	1.78539e-13	9.04764e-12	0.22684	0.102001
NK3	LINC02084	7.05632	1.36004	1.70975e-12	7.92534e-11	0.224242	0.110781
NK3	KIR2DL4	7.03188	1.47526	2.03772e-12	9.40554e-11	0.213853	0.0962433
pNK	FCGR3A	67.8197	5.68247	0	0	0.921587	0.0697148
pNK	KLRF1	65.9701	4.88867	0	0	0.919225	0.0962225
pNK	FGFBP2	64.3729	6.26973	0	0	0.873878	0.0376742
pNK	SPON2	62.9634	4.93988	0	0	0.870572	0.135909
pNK	CX3CR1	51.3852	5.56885	0	0	0.70052	0.0303305
pNK	ADGRG1	43.6524	4.17522	0	0	0.623996	0.0621699
pNK	AKR1C3	42.1423	5.87745	0	0	0.569674	0.0194658
pNK	S1PR5	40.0889	4.77085	0	0	0.555975	0.0322921
pNK	PTPN12	37.901	2.72996	0	0	0.623051	0.175595
pNK	TTC38	37.4348	3.44071	1.06032e-306	5.12251e-304	0.562589	0.0976812
pNK	CEP78	36.7427	3.04455	1.52204e-295	6.75288e-293	0.581956	0.13943
pNK	C1orf21	36.0412	3.07733	1.89329e-284	7.9154e-282	0.560699	0.0981842
pNK	C1orf162	35.6321	2.71905	4.46468e-278	1.83136e-275	0.586207	0.152155
pNK	SH3BP5	34.8344	2.35248	7.34621e-266	2.66178e-263	0.607936	0.19999
pNK	TBX21	32.1565	3.2711	7.1615e-227	2.16238e-224	0.488899	0.0784166
pNK	CHST2	31.7426	3.08258	4.02093e-221	1.16553e-218	0.497874	0.101806
pNK	PRSS23	31.3368	4.12607	1.47252e-215	4.10418e-213	0.446859	0.0399376
pNK	CD160	31.1784	2.52104	2.08806e-213	5.74614e-211	0.526689	0.117248
pNK	GSAP	29.5311	3.3028	1.1494e-191	2.77644e-189	0.450638	0.0770082
pNK	TFDP2	27.6698	2.23498	1.61488e-168	3.22088e-166	0.498347	0.170012
pNK	CTBP2	27.5571	2.61973	3.64107e-167	7.13125e-165	0.454889	0.104924
pNK	GK5	26.2912	2.61824	2.41566e-152	4.13515e-150	0.438829	0.110658
pNK	HSH2D	26.0626	2.11303	9.67378e-150	1.61775e-147	0.484648	0.179317
pNK	ITGAM	25.6245	3.03053	8.14096e-145	1.29186e-142	0.400567	0.0734872
pNK	FCRL6	24.1917	2.40381	2.72287e-129	3.81904e-127	0.410959	0.0951159
pNK	FGR	24.1912	1.63893	2.75428e-129	3.83834e-127	0.505905	0.190483
pNK	TGFBR3	23.9155	3.25465	2.11345e-126	2.85382e-124	0.362305	0.0512047
pNK	ADRB2	23.1989	2.56516	4.66658e-119	6.00305e-117	0.384034	0.0848549
pNK	NCR1	23.0604	2.01461	1.15788e-117	1.46351e-115	0.429854	0.136915
pNK	IL18RAP	22.8693	2.69594	9.38605e-116	1.17272e-113	0.37128	0.0772094
pNK	LPCAT1	22.7951	2.08655	5.12583e-115	6.36775e-113	0.424185	0.143604
pNK	SH2D1B	22.6045	1.98638	3.91814e-113	4.68023e-111	0.426547	0.138575
pNK	CD226	21.947	1.78179	9.25125e-107	1.03671e-104	0.442135	0.16981
pNK	KLF3	21.5069	2.06522	1.34063e-102	1.44284e-100	0.401984	0.135959
pNK	HIPK2	21.359	1.72277	3.21807e-101	3.39615e-99	0.45111	0.197374
pNK	MTSS1	21.0065	2.75964	5.71523e-98	5.91662e-96	0.33727	0.0658418
pNK	HAVCR2	20.8084	1.66307	3.63444e-96	3.69218e-94	0.435522	0.172778
pNK	ICAM2	20.4783	1.80044	3.35978e-93	3.29016e-91	0.4171	0.171923
pNK	PXN	20.4448	2.17115	6.68422e-93	6.48727e-91	0.369391	0.113425
pNK	PLEKHG3	19.9657	3.79655	1.09582e-88	1.02245e-86	0.289088	0.0286706
pNK	VAV3	19.7365	1.52515	1.04864e-86	9.61914e-85	0.439301	0.198883
pNK	STK38	19.4787	1.62415	1.66563e-84	1.50252e-82	0.420406	0.191791
pNK	RHOBTB3	19.2167	3.79959	2.68083e-82	2.34061e-80	0.277752	0.0259544
pNK	THEMIS2	19.214	2.49262	2.82791e-82	2.45915e-80	0.328767	0.0866657
pNK	YPEL1	18.9305	1.63015	6.39705e-80	5.39038e-78	0.406235	0.174186
pNK	LYN	18.9095	1.93484	9.51964e-80	7.92939e-78	0.363722	0.126804
pNK	PDGFD	18.6477	2.80124	1.3188e-77	1.07784e-75	0.295229	0.0508526
pNK	OSBPL5	18.6245	4.40826	2.03363e-77	1.65584e-75	0.260746	0.0160958
pNK	RASA3	18.3482	2.0081	3.41192e-75	2.75744e-73	0.342938	0.11086
pNK	USP28	18.2642	1.57231	1.59427e-74	1.26494e-72	0.399622	0.175947
pNK	GFOD1	17.8188	1.59549	5.05397e-71	3.81504e-69	0.380727	0.153161
pNK	UBE2F	17.6063	1.38534	2.20484e-69	1.63038e-67	0.407652	0.192646
pNK	SSBP3	17.3081	1.8885	4.08791e-67	2.94275e-65	0.342466	0.133042
pNK	RASGRP2	17.1842	1.50498	3.48535e-66	2.46812e-64	0.382617	0.169559
pNK	LAIR1	17.0113	1.50561	6.77131e-65	4.73338e-63	0.382145	0.177104
pNK	ZBTB16	16.9185	2.02834	3.28734e-64	2.28328e-62	0.312234	0.0958704
pNK	MLC1	16.7623	6.02285	4.60244e-63	3.15637e-61	0.225319	0.00432574
pNK	LINC02384	16.7307	4.01333	7.82513e-63	5.33286e-61	0.242796	0.0250993
pNK	LAIR2	16.6185	2.61694	5.12035e-62	3.41462e-60	0.271611	0.0541723
pNK	SIGLEC7	16.5854	3.77976	8.89233e-62	5.87596e-60	0.239962	0.022685
pNK	ASCL2	16.1902	4.45174	5.91764e-59	3.76168e-57	0.226264	0.0134802
pNK	AGTPBP1	16.1202	1.86272	1.84147e-58	1.15039e-56	0.320265	0.120014
pNK	RAP1GAP2	16.0916	3.77688	2.92149e-58	1.81466e-56	0.234294	0.024194
pNK	FCRL3	16.0334	2.59078	7.46945e-58	4.60017e-56	0.259802	0.0490921
CTL	FGFBP2	29.9069	3.52164	1.60038e-196	1.15974e-192	0.766484	0.0959567
CTL	ADGRG1	23.3605	2.9691	1.07678e-120	1.95077e-117	0.608516	0.0993888
CTL	CX3CR1	22.7687	3.03986	9.36003e-115	1.45348e-111	0.585165	0.0780442
CTL	FCGR3A	22.0587	2.50143	7.87984e-108	9.51709e-105	0.629121	0.135355
CTL	S1PR5	18.1903	2.85019	6.15948e-74	3.71964e-71	0.471154	0.0693935
CTL	C1orf21	17.701	2.25468	4.12248e-70	2.29802e-67	0.516484	0.129901
CTL	FCRL6	16.1619	2.20712	9.3583e-59	3.76758e-56	0.46978	0.113728
CTL	SPON2	14.9024	1.47937	3.18171e-50	1.09794e-47	0.527473	0.195628
CTL	TBX21	14.0148	2.07052	1.26632e-44	3.77121e-42	0.416209	0.10771
CTL	TGFBR3	13.774	2.51189	3.65385e-43	9.92935e-41	0.372253	0.0711801
CTL	CEP78	13.5417	1.77749	8.87389e-42	2.26963e-39	0.45467	0.172685
CTL	A2M-AS1	12.6037	2.16158	2.01485e-36	4.51576e-34	0.362637	0.0857546
CTL	ADRB2	12.1187	1.91247	8.40619e-34	1.77428e-31	0.372253	0.104795
CTL	KLF3	11.6268	1.58015	3.01126e-31	5.95135e-29	0.403846	0.153268
CTL	PATL2	11.5215	2.27317	1.02799e-30	2.01339e-28	0.332418	0.0865538
CTL	KLRF1	10.8473	1.13268	2.05394e-27	3.60102e-25	0.428571	0.166761
CTL	PRSS23	10.6525	2.16622	1.69663e-26	2.81563e-24	0.304945	0.0713681
CTL	TTC16	10.3669	3.02765	3.50855e-25	5.33398e-23	0.260989	0.0357781
CTL	S1PR1	10.3431	2.14394	4.49967e-25	6.79326e-23	0.303571	0.0821815
CTL	MIAT	10.2011	1.3392	1.95944e-24	2.83988e-22	0.384615	0.161448
CTL	RASA3	9.934	1.53622	2.96129e-23	3.94959e-21	0.343407	0.125999
CTL	GAB3	9.87446	1.43735	5.37222e-23	6.95191e-21	0.368132	0.1567
CTL	SSBP3	9.55211	1.5046	1.27079e-21	1.55208e-19	0.347527	0.146544
CTL	RASGRP2	9.02728	1.12941	1.76e-19	1.93245e-17	0.381868	0.183498
CTL	ASCL2	8.67584	3.02941	4.10513e-18	4.15095e-16	0.217033	0.0276916
CTL	LPAR6	8.54784	1.56881	1.25418e-17	1.25072e-15	0.292582	0.10724
CTL	RCBTB2	8.48004	1.91755	2.25109e-17	2.22449e-15	0.26511	0.0844852
CTL	LILRB1	8.4481	2.1128	2.96074e-17	2.88639e-15	0.25	0.0689704
CTL	LAIR2	8.19317	1.75389	2.54437e-16	2.32414e-14	0.25	0.0691114
CTL	PXN	8.09345	1.31491	5.79964e-16	5.12538e-14	0.307692	0.132252
CTL	TTC38	7.97521	1.15312	1.52128e-15	1.30207e-13	0.315934	0.136483
CTL	HLA-DRB5	7.86306	0.798045	3.74874e-15	3.1106e-13	0.357143	0.169441
CTL	RAP2A	7.76237	2.09481	8.33569e-15	6.73672e-13	0.233516	0.0671368
CTL	TOB1	7.7574	1.04274	8.66908e-15	6.92889e-13	0.333791	0.161448
CTL	USP28	7.68456	1.02788	1.53529e-14	1.20932e-12	0.355769	0.192055
CTL	CDC25B	7.6077	1.4879	2.7901e-14	2.17408e-12	0.277473	0.116596
CTL	FUT11	7.4784	1.37141	7.52327e-14	5.58211e-12	0.271978	0.108463
CTL	VCL	7.46345	1.47865	8.42881e-14	6.23273e-12	0.270604	0.111801
CTL	AGTPBP1	7.42633	1.28707	1.11654e-13	8.22837e-12	0.292582	0.134039
CTL	LPCAT1	7.3094	1.10452	2.68344e-13	1.9446e-11	0.321429	0.165444
CTL	BCL9L	7.30092	0.977038	2.85804e-13	2.06425e-11	0.34478	0.184861
CTL	ITGAM	7.29249	1.40837	3.04284e-13	2.1689e-11	0.259615	0.0996709
CTL	MTSS1	7.21772	1.47641	5.28673e-13	3.69561e-11	0.245879	0.0866949
CTL	F2R	7.19964	0.916197	6.03722e-13	4.2067e-11	0.346154	0.179878
CTL	PRR5L	7.17489	1.41176	7.23659e-13	4.97859e-11	0.254121	0.0959097
CTL	RAP1GAP2	7.06744	2.30234	1.57815e-12	1.06549e-10	0.193681	0.0393042
CTL	LINC00987	7.00347	1.97716	2.49705e-12	1.68068e-10	0.203297	0.0493183
CTL	FCRL3	7.00268	1.84308	2.51111e-12	1.68493e-10	0.217033	0.0643159
CTL	GK5	6.95692	1.14044	3.47801e-12	2.31229e-10	0.288462	0.137236
TEM	CD8B	40.1299	2.44434	0	0	0.563794	0.148556
TEM	KLRG1	34.8507	2.15698	4.15523e-266	3.34573e-263	0.52714	0.191761
TEM	CD84	28.932	1.85116	4.72276e-184	2.18453e-181	0.466704	0.193878
TEM	DTHD1	24.6698	1.98267	2.2585e-134	7.11592e-132	0.380806	0.135367
TEM	TIGIT	23.9715	1.4665	5.51849e-127	1.59963e-124	0.432569	0.194203
TEM	TRAT1	23.8766	1.75231	5.36017e-126	1.53329e-123	0.395915	0.169019
TEM	CRTAM	22.9594	2.1994	1.18633e-116	3.03422e-114	0.328763	0.0964503
TEM	F2R	21.8958	1.7534	2.84877e-106	6.58855e-104	0.362339	0.151053
TEM	CCL4L2	21.1785	1.74737	1.50652e-99	3.24274e-97	0.398993	0.197731
TEM	THEMIS	19.4685	1.53709	2.03211e-84	3.50619e-82	0.353386	0.172981
TEM	CCR5	17.9681	1.96456	3.46538e-72	4.86047e-70	0.281477	0.10584
TEM	INPP4B	16.657	1.2838	2.69363e-62	3.28986e-60	0.331561	0.173958
TEM	LINC00649	16.463	1.53917	6.76582e-61	8.03764e-59	0.299664	0.144106
TEM	LAG3	15.0536	1.54549	3.27012e-51	3.30662e-49	0.263011	0.111159
TEM	PDCD1	15.0134	2.2735	6.00139e-51	6.01246e-49	0.214885	0.0624729
TEM	SLAMF7	14.9977	1.21592	7.60411e-51	7.58318e-49	0.325406	0.185899
TEM	SLF1	14.5541	1.2462	5.50123e-48	5.26858e-46	0.314494	0.185736
TEM	BICDL1	13.3756	1.65662	8.3963e-41	6.83654e-39	0.231114	0.0998155
TEM	MIAT	13.1182	1.3027	2.58859e-39	2.02431e-37	0.273923	0.148448
TEM	IFNG-AS1	13.0893	3.0328	3.79023e-39	2.93237e-37	0.169838	0.0351715
TEM	HLA-DRB5	12.6367	0.877051	1.32544e-36	9.66949e-35	0.287633	0.15393
TEM	ST8SIA1	12.5609	2.43411	3.46298e-36	2.46837e-34	0.170397	0.0403278
TEM	TNIP3	12.3027	2.65003	8.76001e-35	6.12355e-33	0.161444	0.0336518
TEM	AC004585.1	11.6071	2.60739	3.79252e-31	2.42498e-29	0.155008	0.0349001
TEM	CD5	11.1051	1.38795	1.18545e-28	7.04145e-27	0.214046	0.105297
TEM	CCL3L1	10.916	1.68297	9.66715e-28	5.50167e-26	0.186346	0.0754993
TEM	ARHGAP26	10.8807	1.00735	1.42502e-27	8.02587e-26	0.272244	0.172872
TEM	A2M-AS1	10.5411	1.58325	5.58454e-26	2.93966e-24	0.184387	0.0775619
TEM	PTTG1	10.342	1.24289	4.54897e-25	2.32693e-23	0.219642	0.119844
TEM	LINC01934	10.2999	1.13099	7.05208e-25	3.59045e-23	0.238948	0.141392
TEM	LY9	10.265	1.12398	1.01348e-24	5.10022e-23	0.242306	0.148231
TEM	ZNF80	10.2512	3.15797	1.16936e-24	5.84411e-23	0.128148	0.0210595
TEM	PECAM1	10.0568	1.29173	8.57795e-24	4.18127e-22	0.219362	0.125651
TEM	CD28	9.65567	1.2936	4.65116e-22	2.07631e-20	0.195859	0.100792
TEM	TRPS1	9.64283	1.33236	5.27156e-22	2.33885e-20	0.203414	0.111431
TEM	AC246785.3	9.55641	1.38871	1.21915e-21	5.33284e-20	0.192222	0.100141
TEM	OASL	9.4706	1.17816	2.78247e-21	1.19547e-19	0.206491	0.11485
TEM	HLA-DMA	9.33686	0.882571	9.92351e-21	4.13289e-19	0.247902	0.157838
TEM	DNAJB1	9.21638	0.974995	3.073e-20	1.2464e-18	0.264689	0.189047
TEM	MT1F	9.09663	1.20609	9.31746e-20	3.67625e-18	0.203693	0.118541
TEM	TPRG1	9.06085	2.2732	1.29432e-19	5.07914e-18	0.128148	0.0344116
ILC	LST1	25.2059	4.59522	3.44721e-140	7.49425e-136	0.797954	0.117832
ILC	TNFSF13B	24.1129	4.56534	1.8316e-128	1.3273e-124	0.757033	0.0683112
ILC	IL4I1	22.4761	5.32441	7.11095e-112	2.57653e-108	0.68798	0.0354515
ILC	KIT	22.2508	5.6172	1.10819e-109	3.44172e-106	0.675192	0.0291572
ILC	KRT86	20.0129	3.02287	4.24827e-89	7.10441e-86	0.71867	0.150553
ILC	TNFRSF25	17.6693	2.87466	7.23376e-70	8.27695e-67	0.636829	0.139723
ILC	KRT81	17.6461	2.70151	1.09062e-69	1.1855e-66	0.667519	0.163373
ILC	AQP3	16.582	2.61364	9.39872e-62	7.0458e-59	0.621483	0.155181
ILC	PRR5	16.4061	2.74156	1.72851e-60	1.21218e-57	0.601023	0.139816
ILC	RORC	16.0653	5.17382	4.46627e-58	2.69713e-55	0.491049	0.0197158
ILC	GSN	15.0973	2.58819	1.68655e-51	8.33307e-49	0.570332	0.147637
ILC	ENPP1	15.0163	5.862	5.74614e-51	2.71568e-48	0.452685	0.0117554
ILC	IL23R	14.8142	5.33451	1.18611e-49	5.0561e-47	0.450128	0.0142084
ILC	NRIP1	14.6386	2.63253	1.59236e-48	6.53169e-46	0.542199	0.124497
ILC	PCDH9	14.6033	5.43598	2.67675e-48	1.07764e-45	0.445013	0.0168927
ILC	SPRY1	14.4154	2.22296	4.14032e-47	1.60733e-44	0.588235	0.174157
ILC	PLAT	14.1249	3.67986	2.66767e-45	9.50739e-43	0.462916	0.0510483
ILC	TNFRSF4	13.6223	2.3922	2.95281e-42	9.87603e-40	0.537084	0.161105
ILC	LIF	13.5321	5.74844	1.01142e-41	3.33157e-39	0.409207	0.0117092
ILC	AHR	13.4959	3.19747	1.65347e-41	5.36514e-39	0.465473	0.0800666
ILC	CCL20	13.4823	3.60004	1.98871e-41	6.17637e-39	0.442455	0.0479011
ILC	IFI44	13.2216	2.28809	6.58765e-40	1.96186e-37	0.514066	0.128755
ILC	AREG	12.9151	3.45666	3.7002e-38	1.00553e-35	0.473146	0.118295
ILC	CCR6	12.8101	2.40429	1.43937e-37	3.81608e-35	0.488491	0.115379
ILC	LINC00299	12.7769	5.00805	2.20736e-37	5.64564e-35	0.393862	0.0220299
ILC	IL1R1	12.6971	3.53332	6.13571e-37	1.53322e-34	0.419437	0.047392
ILC	AFF3	12.6834	3.36846	7.31272e-37	1.78628e-34	0.421995	0.0484102
ILC	CPNE7	12.1393	2.9672	6.53657e-34	1.43541e-31	0.419437	0.0600268
ILC	TLE1	11.8655	2.48622	1.78836e-32	3.66782e-30	0.455243	0.119313
ILC	JAML	11.8538	1.95699	2.05732e-32	4.18002e-30	0.516624	0.187069
ILC	ABHD15	11.7472	2.09326	7.29859e-32	1.41671e-29	0.478261	0.136206
ILC	SLC4A10	11.6375	3.86164	2.65591e-31	4.97755e-29	0.370844	0.0267043
ILC	IKZF2	11.6209	2.02627	3.22801e-31	5.94719e-29	0.470588	0.120193
ILC	JMY	11.2688	2.3913	1.87123e-29	3.17817e-27	0.424552	0.0935808
ILC	CA2	11.1409	5.03369	7.93029e-29	1.2866e-26	0.340153	0.0122645
ILC	TOX2	11.0172	3.73484	3.15741e-28	5.0846e-26	0.358056	0.0354978
ILC	IL18R1	10.894	2.04965	1.23075e-27	1.95304e-25	0.450128	0.129171
ILC	TEX30	10.6847	2.64694	1.20059e-26	1.77557e-24	0.391304	0.0838154
ILC	MAN1A1	10.5405	1.90009	5.62038e-26	7.98608e-24	0.452685	0.154209
ILC	TIAM1	10.5122	2.41634	7.59213e-26	1.05803e-23	0.398977	0.0938585
ILC	FURIN	10.4481	2.31455	1.49417e-25	2.04297e-23	0.401535	0.0986717
ILC	ALDOC	10.4263	3.86735	1.88057e-25	2.55522e-23	0.350384	0.0535937
ILC	APOL4	10.321	4.32081	5.66211e-25	7.59841e-23	0.324808	0.0229555
ILC	ABCB1	10.1553	1.53026	3.13937e-24	4.0625e-22	0.491049	0.185588
ILC	BLVRA	10.0563	2.27923	8.61767e-24	1.0956e-21	0.391304	0.0989494
ILC	DLL1	10.0368	4.3953	1.05032e-23	1.31989e-21	0.314578	0.0202249
ILC	RETREG1	9.99186	1.93701	1.65454e-23	2.04373e-21	0.414322	0.120146
ILC	SPINK2	9.91321	1.58986	3.64748e-23	4.381e-21	0.409207	0.104642
ILC	TBC1D31	9.89631	1.78377	4.31908e-23	5.13097e-21	0.43734	0.150368
ILC	AC007952.4	9.61131	2.17947	7.16336e-22	8.32788e-20	0.401535	0.130282
ILC	DCAF11	9.54332	1.67393	1.38336e-21	1.57457e-19	0.439898	0.167399
ILC	RUNX2	9.39153	2.23215	5.91354e-21	6.5592e-19	0.363171	0.0867312
ILC	TPMT	9.39095	1.97497	5.94612e-21	6.56186e-19	0.396419	0.123432
ILC	LTA4H	9.34254	1.76348	9.40523e-21	1.01223e-18	0.419437	0.147637
ILC	REEP3	9.2498	1.97268	2.24917e-20	2.37364e-18	0.386189	0.118665
ILC	GRAMD2B	9.24613	3.00651	2.32768e-20	2.44463e-18	0.317136	0.0450317
ILC	MFGE8	9.18774	2.55755	4.01177e-20	4.12811e-18	0.347826	0.0828898
ILC	MGAT5	9.16905	1.5004	4.77184e-20	4.84765e-18	0.455243	0.191003
ILC	SPATS2L	9.13777	1.89648	6.37536e-20	6.44653e-18	0.391304	0.126394
ILC	FES	9.12021	3.41398	7.49801e-20	7.54661e-18	0.299233	0.0304068
ILC	ZG16B	9.07057	5.6581	1.184e-19	1.17001e-17	0.273657	0.00666451
ILC	SVIL	9.00085	2.89218	2.23982e-19	2.15459e-17	0.314578	0.0516962
ILC	ZBTB16	8.96226	1.90601	3.18085e-19	3.0066e-17	0.378517	0.111954
ILC	GPR82	8.83512	1.49455	9.99882e-19	9.05727e-17	0.429668	0.172768
ILC	KIAA1211L	8.72007	5.52737	2.78022e-18	2.47713e-16	0.263427	0.00652566
ILC	PNP	8.64853	1.7085	5.21668e-18	4.57301e-16	0.396419	0.150322
ILC	BEX4	8.54572	1.4206	1.27734e-17	1.10635e-15	0.432225	0.184292
ILC	PLXNC1	8.39351	1.9086	4.71842e-17	3.94532e-15	0.350384	0.101032
ILC	ZNRF1	8.35656	1.51652	6.45742e-17	5.29752e-15	0.388747	0.134817
ILC	ELK3	8.30436	1.66223	1.00358e-16	8.14095e-15	0.388747	0.151479
ILC	APP	8.17567	2.21262	2.94232e-16	2.36037e-14	0.317136	0.0769195
ILC	SPART	8.12099	1.71338	4.62391e-16	3.62902e-14	0.350384	0.104781
ILC	IGFBP4	8.11611	2.34882	4.81365e-16	3.76434e-14	0.314578	0.0800204
ILC	ENG	8.07184	2.14704	6.92493e-16	5.35758e-14	0.319693	0.0819179
ILC	C20orf204	8.06425	3.70702	7.36845e-16	5.6805e-14	0.263427	0.0276299
ILC	ATP10D	8.06305	1.65502	7.44125e-16	5.71635e-14	0.368286	0.130236
ILC	REPIN1	8.03112	1.69325	9.65835e-16	7.3934e-14	0.365729	0.136946
ILC	CD2AP	8.00471	1.35969	1.1975e-15	9.07099e-14	0.419437	0.183413
ILC	VWA5A	7.99449	3.49835	1.3011e-15	9.72025e-14	0.26087	0.0253159
ILC	CTSH	7.80746	1.94101	5.83534e-15	4.25706e-13	0.345269	0.125052
ILC	CASP3	7.79816	1.44035	6.28183e-15	4.56746e-13	0.404092	0.179433
ILC	LAYN	7.77644	2.6252	7.4596e-15	5.38776e-13	0.273657	0.0426714
ILC	CITED4	7.7501	2.32408	9.18168e-15	6.56611e-13	0.294118	0.0663211
ILC	SH2D1B	7.74266	1.28455	9.73612e-15	6.93978e-13	0.401535	0.162031
ILC	CD300LF	7.72488	6.92258	1.11961e-14	7.90268e-13	0.230179	0.00282316
ILC	LAPTM4B	7.71704	2.28809	1.19059e-14	8.37652e-13	0.296675	0.0715509
ILC	CBL	7.71102	1.21809	1.24819e-14	8.75345e-13	0.429668	0.198732
ILC	SPTLC2	7.69749	1.28541	1.38761e-14	9.66881e-13	0.41688	0.186745
ILC	CFAP36	7.69458	1.54831	1.41955e-14	9.85972e-13	0.360614	0.132642
ILC	LAT2	7.69112	1.21207	1.45856e-14	1.00984e-12	0.429668	0.195955
ILC	IL4R	7.66759	1.34335	1.75264e-14	1.20197e-12	0.378517	0.148563
ILC	TESPA1	7.62812	1.28356	2.38194e-14	1.60818e-12	0.401535	0.176424
ILC	CERS6	7.57787	2.33138	3.51281e-14	2.34259e-12	0.286445	0.0652103
ILC	TMED8	7.55257	2.07668	4.26745e-14	2.82848e-12	0.299233	0.075855
ILC	RAB37	7.524	1.35315	5.31242e-14	3.49976e-12	0.383632	0.158421
ILC	BEX2	7.51596	1.64948	5.64934e-14	3.71047e-12	0.337596	0.11487
ILC	CLNK	7.49851	1.54868	6.4549e-14	4.2141e-12	0.350384	0.12496
TN-TCM	CCR7	46.585	3.83591	0	0	0.702298	0.10032
TN-TCM	SELL	39.6683	2.72645	0	0	0.677323	0.152981
TN-TCM	LEF1	35.8686	3.30109	9.42227e-282	2.38186e-279	0.55994	0.0818664
TN-TCM	MAL	35.5226	4.13875	2.19883e-276	5.31139e-274	0.518981	0.0413083
TN-TCM	TRABD2A	31.1915	4.07107	1.39098e-213	2.45852e-211	0.457043	0.0378076
TN-TCM	IL6ST	26.4582	2.44798	2.93607e-154	3.98938e-152	0.47003	0.124625
TN-TCM	SERINC5	26.2411	2.57322	9.0345e-152	1.21994e-149	0.449051	0.0962192
TN-TCM	PRKCA	23.7602	2.03491	8.62612e-125	9.76728e-123	0.453546	0.135227
TN-TCM	TRAT1	21.327	1.52641	6.37044e-101	5.8436e-99	0.477023	0.178736
TN-TCM	LDLRAP1	20.2531	1.97618	3.33799e-91	2.76977e-89	0.388611	0.114123
TN-TCM	CAMK4	19.6844	1.43023	2.93215e-86	2.29298e-84	0.465534	0.196939
TN-TCM	CD40LG	18.7629	1.61043	1.51859e-78	1.11159e-76	0.382118	0.117524
TN-TCM	SATB1	18.5749	1.43136	5.13199e-77	3.71898e-75	0.443057	0.196139
TN-TCM	ACTN1	18.3771	2.83438	2.00513e-75	1.41992e-73	0.297203	0.0495099
TN-TCM	TSHZ2	18.2709	3.88557	1.41007e-74	9.88871e-73	0.26973	0.0233047
TN-TCM	INPP4B	17.9892	1.40115	2.36938e-72	1.61474e-70	0.426573	0.176835
TN-TCM	PDE3B	17.7721	1.46365	1.16219e-70	7.63327e-69	0.401099	0.154781
TN-TCM	THEM4	17.6125	1.54637	1.97648e-69	1.27883e-67	0.394605	0.158582
TN-TCM	CD4	17.3536	1.69319	1.8518e-67	1.16018e-65	0.346154	0.104021
TN-TCM	AIF1	17.1823	2.67802	3.60151e-66	2.18706e-64	0.286214	0.0565613
TN-TCM	STMN3	16.6413	1.5027	3.502e-62	2.04111e-60	0.36963	0.139778
TN-TCM	MYC	15.9468	1.70982	2.99745e-57	1.64557e-55	0.325674	0.109972
TN-TCM	MAML2	15.8008	1.23897	3.07155e-56	1.65696e-54	0.411588	0.19859
TN-TCM	TESPA1	15.5934	1.36827	8.07369e-55	4.24993e-53	0.372128	0.161232
TN-TCM	TNFRSF25	15.5378	1.45838	1.92587e-54	1.00888e-52	0.345155	0.128876
TN-TCM	RASGRP2	15.3319	1.22022	4.67846e-53	2.39881e-51	0.386114	0.170434
TN-TCM	IL6R	15.3029	3.11537	7.31059e-53	3.73081e-51	0.24026	0.0341568
TN-TCM	TMEM63A	15.2337	1.5423	2.11151e-52	1.06015e-50	0.332168	0.123475
TN-TCM	SH3YL1	15.1493	1.4862	7.65426e-52	3.79917e-50	0.336164	0.129826
TN-TCM	SESN3	15.0322	1.77869	4.51687e-51	2.19189e-49	0.308691	0.106771
TN-TCM	ARMH1	14.8736	2.77921	4.89237e-50	2.34274e-48	0.238761	0.0369574
TN-TCM	LPAR6	14.8624	1.83358	5.77784e-50	2.76066e-48	0.296703	0.095019
TN-TCM	FHIT	14.7833	3.43667	1.87796e-49	8.85615e-48	0.224775	0.0254551
TN-TCM	LINC01550	14.6923	1.99994	7.22239e-49	3.39125e-47	0.27023	0.0682637
TN-TCM	AQP3	13.4622	1.28384	2.61023e-41	1.06867e-39	0.331169	0.146679
TN-TCM	ADTRP	13.4298	4.40742	4.04501e-41	1.64371e-39	0.192308	0.0108522
TN-TCM	ITGA6	13.3653	1.60856	9.64006e-41	3.8667e-39	0.282717	0.10062
TN-TCM	KLF3	13.0667	1.15909	5.10215e-39	1.95973e-37	0.32967	0.144729
TN-TCM	CHRM3-AS2	12.8331	1.98303	1.06944e-37	3.96076e-36	0.23976	0.064963
TN-TCM	THOC3	12.5941	1.22942	2.27449e-36	8.13281e-35	0.32967	0.162683
TN-TCM	C1orf162	12.2023	0.913692	3.02351e-34	1.02385e-32	0.353646	0.177936
TN-TCM	TMEM204	11.9894	1.32913	4.03786e-33	1.31216e-31	0.28022	0.114623
TN-TCM	CD28	11.9784	1.29497	4.60978e-33	1.49132e-31	0.26973	0.10087
TN-TCM	GPR155	11.9152	1.24999	9.86844e-33	3.17367e-31	0.298701	0.135527
TN-TCM	EPHX2	11.867	2.61779	1.75721e-32	5.56876e-31	0.193307	0.0320564
TN-TCM	CDC14A	11.7931	1.09933	4.23893e-32	1.33364e-30	0.335664	0.176635
TN-TCM	CHMP7	11.5862	1.20638	4.84398e-31	1.48951e-29	0.297702	0.139178
TN-TCM	NELL2	11.4776	2.26708	1.70915e-30	5.18228e-29	0.195305	0.0382577
TN-TCM	AC013264.1	11.3855	1.88717	4.94105e-30	1.48573e-28	0.214286	0.0588118
TN-TCM	RIC3	10.9308	1.52683	8.21023e-28	2.31806e-26	0.233267	0.0834667
TN-TCM	FLT3LG	10.6639	0.970173	1.50223e-26	4.10283e-25	0.310689	0.161732
TN-TCM	AC005842.1	10.5619	4.52196	4.47424e-26	1.20983e-24	0.14985	0.00685137
TN-TCM	LINS1	10.5574	1.06922	4.69329e-26	1.26748e-24	0.297702	0.15188
TN-TCM	ABLIM1	10.4941	0.859714	9.19473e-26	2.46174e-24	0.338661	0.190788
TN-TCM	LRRN3	10.4687	3.29253	1.20325e-25	3.19398e-24	0.158841	0.0172034
TN-TCM	LRRC75A	10.2362	1.43099	1.36466e-24	3.50267e-23	0.234266	0.0961692
TN-TCM	FBLN5	10.2213	1.68205	1.59254e-24	4.07796e-23	0.202797	0.0623625
TN-TCM	PASK	10.092	1.75888	5.99156e-24	1.4972e-22	0.199301	0.0626125
TN-TCM	CMTM8	10.0773	2.05926	6.95821e-24	1.73476e-22	0.182318	0.045109
TN-TCM	SUSD3	9.99748	0.837166	1.56326e-23	3.84884e-22	0.321179	0.178486
TN-TCM	MHENCR	9.98457	1.0396	1.78064e-23	4.36921e-22	0.276224	0.135777
TN-TCM	BEX2	9.48158	1.07033	2.50455e-21	5.68359e-20	0.241259	0.106571
TN-TCM	ANK3	9.41219	1.34865	4.85892e-21	1.089e-19	0.211289	0.0807662
TReg	CTLA4	34.3048	5.21028	6.65352e-258	2.41079e-254	0.658915	0.0356768
TReg	TNFRSF4	32.3711	3.80979	6.99826e-230	2.17346e-226	0.685078	0.142326
TReg	BATF	31.8545	3.12806	1.13932e-222	2.25171e-219	0.697674	0.185491
TReg	TBC1D4	31.6107	3.9693	2.63488e-219	4.40633e-216	0.639535	0.0824192
TReg	FOXP3	30.9615	7.50004	1.77686e-210	2.57526e-207	0.574612	0.00605743
TReg	CD4	29.0514	3.24868	1.47657e-185	1.68951e-182	0.622093	0.101641
TReg	IL2RA	28.9874	5.05483	9.4744e-185	1.02987e-181	0.562016	0.0443098
TReg	RTKN2	26.76	5.151	9.44787e-158	7.08265e-155	0.515504	0.0275684
TReg	IKZF2	25.4473	3.00435	7.57073e-143	5.30928e-140	0.562016	0.104979
TReg	ICOS	23.1877	3.2976	6.06071e-119	3.294e-116	0.494186	0.0782696
TReg	PHTF2	22.628	2.34116	2.29845e-113	1.16205e-110	0.561047	0.175952
TReg	DNPH1	22.0728	2.45903	5.77552e-108	2.56244e-105	0.533915	0.165649
TReg	SLAMF1	21.191	2.61418	1.15572e-99	4.48667e-97	0.496124	0.121673
TReg	CD28	20.8058	2.70229	3.83625e-96	1.43793e-93	0.474806	0.0985882
TReg	LAIR2	20.73	3.41858	1.85758e-95	6.84471e-93	0.435078	0.0573786
TReg	SIRPG	20.6444	2.64489	1.09581e-94	3.97048e-92	0.471899	0.0962511
TReg	ENTPD1	20.1035	2.54389	6.87667e-90	2.19851e-87	0.47093	0.107984
TReg	C15orf53	19.4264	3.67351	4.61899e-84	1.35698e-81	0.400194	0.0484117
TReg	DUSP4	19.2375	3.08703	1.79801e-82	5.21184e-80	0.419574	0.0727845
TReg	LINC01943	18.4708	3.74637	3.54589e-76	9.51698e-74	0.380814	0.0469331
TReg	FANK1	17.9972	6.73502	2.04882e-72	5.00464e-70	0.335271	0.00429266
TReg	STAM	17.9919	2.72605	2.25418e-72	5.44509e-70	0.410853	0.0905752
TReg	ICA1	17.6358	4.93835	1.30848e-69	2.96316e-67	0.340116	0.0174091
TReg	MAST4	17.5112	3.21141	1.17606e-68	2.58258e-66	0.375969	0.0603358
TReg	NAMPT	17.3049	2.24714	4.31839e-67	8.94113e-65	0.432171	0.128303
TReg	GADD45A	16.5022	2.39111	3.53482e-61	6.62473e-59	0.412791	0.128112
TReg	HACD1	16.3971	4.3876	2.00593e-60	3.69567e-58	0.321705	0.0218926
TReg	PTTG1	16.0287	2.12615	8.05353e-58	1.37861e-55	0.409884	0.122579
TReg	MIR4435-2HG	15.8481	1.97626	1.44889e-56	2.42298e-54	0.429264	0.156205
TReg	LAYN	15.8306	3.63777	1.91304e-56	3.17477e-54	0.322674	0.0331966
TReg	LAPTM4B	15.4756	2.89842	5.0709e-54	8.04682e-52	0.342054	0.0624344
TReg	GALM	15.4509	1.94927	7.43676e-54	1.17156e-51	0.407946	0.128541
TReg	TNFRSF9	15.1523	4.00623	7.31738e-52	1.12823e-49	0.301357	0.0223696
TReg	CCR4	14.8458	3.78995	7.4057e-50	1.05921e-47	0.297481	0.023562
TReg	DUSP16	14.445	2.57553	2.69467e-47	3.61618e-45	0.329457	0.0646284
TReg	TNFRSF25	14.3381	1.80008	1.26502e-46	1.67692e-44	0.398256	0.136268
TReg	ACP5	14.027	1.74955	1.0662e-44	1.36348e-42	0.418605	0.180673
TReg	IL1R1	13.8436	3.207	1.39028e-43	1.71731e-41	0.294574	0.0421635
TReg	LIMA1	13.7688	1.93948	3.92693e-43	4.79615e-41	0.364341	0.113231
TReg	AQP3	13.7429	1.71055	5.61605e-43	6.82084e-41	0.397287	0.15196
TReg	BTG3	13.6999	1.79663	1.01654e-42	1.22776e-40	0.387597	0.144567
TReg	F5	13.461	5.84334	2.65285e-41	3.08411e-39	0.252907	0.00529429
TReg	CLEC7A	13.2896	4.08849	2.66024e-40	3.04387e-38	0.263566	0.0198416
TReg	PIM2	13.081	1.79911	4.23083e-39	4.64536e-37	0.369186	0.139273
TReg	ZNRF1	12.9354	1.84917	2.84225e-38	3.01417e-36	0.358527	0.128541
TReg	IKZF4	12.6695	4.10531	8.73003e-37	8.74612e-35	0.251938	0.0199847
TReg	CLN5	12.194	1.83477	3.34765e-34	3.08381e-32	0.333333	0.113708
TReg	ZC2HC1A	11.9614	3.98402	5.65956e-33	5.022e-31	0.243217	0.0254221
TReg	IL6ST	11.9016	1.68935	1.16071e-32	1.02577e-30	0.354651	0.146284
TReg	MIR3142HG	11.828	3.69824	2.79711e-32	2.40353e-30	0.239341	0.0220357
TReg	SELL	11.8183	1.17227	3.13958e-32	2.68718e-30	0.415698	0.190117
TReg	HNRNPLL	11.7828	1.78075	4.78626e-32	4.06458e-30	0.317829	0.101068
TReg	FAS	11.7162	1.80702	1.05278e-31	8.8711e-30	0.318798	0.105123
TReg	SPATS2L	11.5994	1.77499	4.14743e-31	3.38967e-29	0.328488	0.121387
TReg	AC133644.2	11.5955	4.03536	4.34517e-31	3.53797e-29	0.233527	0.0220357
TReg	CCDC71L	11.4522	1.76752	2.29134e-30	1.83139e-28	0.317829	0.110942
TReg	CD5	11.4383	1.60324	2.69087e-30	2.14284e-28	0.325581	0.112992
TReg	SNX9	11.2625	1.77083	2.00917e-29	1.55442e-27	0.312984	0.109749
TReg	ASB2	11.2052	2.07202	3.84558e-29	2.94151e-27	0.286822	0.0846609
TReg	NCF4	11.1658	1.7049	5.99502e-29	4.55705e-27	0.317829	0.116951
TReg	IL1R2	11.0799	6.62808	1.57002e-28	1.17293e-26	0.206395	0.00243251
TReg	THADA	11.0705	1.82314	1.74387e-28	1.29834e-26	0.314922	0.117094
TReg	UXS1	11.0371	1.43458	2.53127e-28	1.87176e-26	0.348837	0.147095
TReg	DGKH	10.9855	1.98522	4.48666e-28	3.29527e-26	0.280039	0.0777449
TReg	TFRC	10.973	1.921	5.15486e-28	3.76063e-26	0.297481	0.100258
TReg	SESN3	10.9512	1.64528	6.55675e-28	4.75146e-26	0.31686	0.115711
TReg	FBLN7	10.8236	3.2288	2.66002e-27	1.86545e-25	0.224806	0.0251836
TReg	CCR6	10.8189	1.64501	2.79984e-27	1.95719e-25	0.310078	0.112754
TReg	POU2F2	10.6273	1.16528	2.22509e-26	1.51167e-24	0.387597	0.194315
TReg	HTATIP2	10.5218	1.22463	6.85382e-26	4.54274e-24	0.367248	0.173996
TReg	THEM4	10.4884	1.33755	9.76287e-26	6.37372e-24	0.356589	0.171373
TReg	LINC00649	10.4491	1.2023	1.47901e-25	9.59811e-24	0.356589	0.160164
TReg	CCNG2	10.4482	1.73163	1.49281e-25	9.65886e-24	0.296512	0.107841
TReg	MCF2L2	10.4135	3.22483	2.15141e-25	1.38377e-23	0.218023	0.0268053
TReg	BEX3	10.2403	2.63949	1.30807e-24	8.24272e-23	0.239341	0.0550892
TReg	TOX2	10.203	2.76245	1.92164e-24	1.20741e-22	0.22093	0.0323858
TReg	IL18R1	10.1678	1.45236	2.7602e-24	1.72433e-22	0.312984	0.126109
TReg	EPHX2	10.1663	2.85538	2.80407e-24	1.74672e-22	0.223837	0.0380139
TReg	LFNG	10.0814	1.29979	6.67972e-24	4.1138e-22	0.346899	0.164361
TReg	CD79B	10.064	0.90803	7.9655e-24	4.89181e-22	0.372093	0.174664
TReg	ADAM12	10.0623	3.58692	8.10921e-24	4.96604e-22	0.204457	0.0196032
TReg	MAGEH1	9.98105	1.95752	1.84504e-23	1.11112e-21	0.272287	0.0934847
TReg	MAPKAPK3	9.88776	1.31838	4.70416e-23	2.76401e-21	0.334302	0.157922
TReg	NRIP1	9.85908	1.58753	6.26179e-23	3.64963e-21	0.299419	0.123676
CD4-TRM	CD40LG	41.4901	3.47604	0	0	0.621156	0.0897643
CD4-TRM	AQP3	25.5784	2.16614	2.65527e-144	9.46322e-142	0.458062	0.131624
CD4-TRM	CD4	24.9859	2.34642	8.70862e-138	2.82575e-135	0.421715	0.0940963
CD4-TRM	TNFRSF25	24.5457	2.17745	4.80293e-133	1.43035e-130	0.434296	0.117671
CD4-TRM	JAML	22.633	1.76371	2.0506e-113	4.74255e-111	0.455732	0.164517
CD4-TRM	DPP4	20.7624	2.78941	9.46644e-96	1.78957e-93	0.328518	0.0594399
CD4-TRM	TNFSF13B	20.5389	2.97905	9.68117e-94	1.81438e-91	0.32013	0.0546544
CD4-TRM	PDE4D	20.2595	1.89338	2.9319e-91	5.44781e-89	0.39562	0.141195
CD4-TRM	CCR6	19.7048	2.18747	1.96264e-86	3.44095e-84	0.350885	0.0972698
CD4-TRM	CAMK4	18.577	1.35848	4.93003e-77	7.49503e-75	0.43616	0.198166
CD4-TRM	IFI44	17.6559	1.97351	9.1651e-70	1.24531e-67	0.33644	0.113893
CD4-TRM	SLAMF1	16.1043	1.60592	2.38134e-58	2.7984e-56	0.32945	0.118678
CD4-TRM	TRAT1	16.0955	1.17747	2.74286e-58	3.2059e-56	0.401678	0.184717
CD4-TRM	CDC14A	15.7527	1.35223	6.57732e-56	7.18548e-54	0.371389	0.17162
CD4-TRM	INPP4B	15.166	1.24216	5.93963e-52	6.034e-50	0.377446	0.180334
CD4-TRM	FLT3LG	14.9204	1.32347	2.42801e-50	2.44375e-48	0.349487	0.156458
CD4-TRM	CCL20	14.9144	2.93158	2.65786e-50	2.66276e-48	0.230662	0.0359158
CD4-TRM	PDE3B	14.7757	1.36935	2.1015e-49	2.05796e-47	0.348089	0.158725
CD4-TRM	TOB1	14.2563	1.49693	4.0946e-46	3.78794e-44	0.32945	0.149607
CD4-TRM	ELK3	13.7992	1.4487	2.5757e-43	2.23983e-41	0.313607	0.138626
CD4-TRM	SERINC5	13.5399	1.54836	9.09736e-42	7.63616e-40	0.287046	0.111173
CD4-TRM	PTGER4	13.1511	1.11757	1.67686e-39	1.3452e-37	0.365797	0.199073
CD4-TRM	MAL	13.0582	1.84574	5.70418e-39	4.54245e-37	0.239981	0.0680032
CD4-TRM	PERP	12.9749	1.56065	1.69726e-38	1.32728e-36	0.27726	0.111525
CD4-TRM	IL4I1	12.9366	2.76168	2.79749e-38	2.16432e-36	0.200373	0.0304755
CD4-TRM	ADAM19	12.6758	1.56861	8.05175e-37	6.01529e-35	0.268406	0.105632
CD4-TRM	RUNX2	12.492	1.8566	8.25412e-36	6.06232e-34	0.237651	0.0758614
CD4-TRM	IFI44L	12.4552	1.97445	1.31048e-35	9.56033e-34	0.224604	0.0618577
CD4-TRM	CD28	12.2377	1.35605	1.95581e-34	1.3847e-32	0.264212	0.100242
CD4-TRM	SUSD3	11.9923	1.0288	3.89695e-33	2.63105e-31	0.332712	0.176204
CD4-TRM	IL18R1	11.9867	1.35444	4.17121e-33	2.8075e-31	0.275862	0.119635
CD4-TRM	CD226	11.5115	0.949484	1.15431e-30	7.51336e-29	0.335042	0.180989
CD4-TRM	CERK	11.4368	1.17187	2.73684e-30	1.7708e-28	0.294035	0.14729
CD4-TRM	THEM4	10.8725	1.052	1.55837e-27	9.20626e-26	0.303355	0.166734
CD4-TRM	B3GALT2	10.3121	3.41747	6.21328e-25	3.41103e-23	0.151445	0.0165223
CD4-TRM	KDSR	10.2189	1.39985	1.63174e-24	8.89072e-23	0.232992	0.101148
CD8-TRM	CD8B	50.0761	3.06403	0	0	0.789192	0.15107
CD8-TRM	ZNF683	32.3289	2.92933	2.74308e-229	2.71066e-226	0.492631	0.0715623
CD8-TRM	LAG3	29.8819	2.6077	3.379e-196	2.82537e-193	0.479678	0.0968673
CD8-TRM	THEMIS	22.9585	1.67673	1.21131e-116	5.48622e-114	0.4636	0.172681
CD8-TRM	CISH	22.9245	1.66998	2.6476e-116	1.17467e-113	0.475212	0.19085
CD8-TRM	JAML	21.418	1.63781	9.08456e-102	3.29164e-99	0.438142	0.16514
CD8-TRM	CD226	19.7754	1.52823	4.85055e-87	1.38751e-84	0.41983	0.170656
CD8-TRM	SLF1	18.2449	1.39272	2.26968e-74	5.24924e-72	0.412238	0.183359
CD8-TRM	ATP1B1	18.1744	2.03644	8.22709e-74	1.86309e-71	0.327378	0.096766
CD8-TRM	SPRY1	17.758	1.51104	1.49574e-70	3.01087e-68	0.38142	0.158864
CD8-TRM	PTGER4	17.3354	1.33424	2.54486e-67	4.85309e-65	0.410451	0.193228
CD8-TRM	SUSD3	16.5515	1.35641	1.56161e-61	2.6523e-59	0.377847	0.170353
CD8-TRM	TOB1	15.7719	1.57703	4.85862e-56	7.13692e-54	0.34167	0.147376
CD8-TRM	SMPD3	14.4304	2.51558	3.33327e-47	4.07109e-45	0.230013	0.0445873
CD8-TRM	PERP	13.7349	1.57186	6.27134e-43	6.99174e-41	0.283609	0.110026
CD8-TRM	MSH3	12.8179	1.38943	1.30123e-37	1.28004e-35	0.295668	0.138722
CD8-TRM	LDLRAD4	12.7242	1.05044	4.33936e-37	4.17423e-35	0.34301	0.183461
CD8-TRM	MXRA7	12.7	1.26887	5.91434e-37	5.63938e-35	0.297454	0.135736
CD8-TRM	LAIR1	12.4364	1.07154	1.65874e-35	1.48399e-33	0.334971	0.181183
CD8-TRM	NBL1	11.9386	1.43459	7.44417e-33	6.03866e-31	0.251452	0.0970697
CD8-TRM	CCR5	11.8039	1.19637	3.7274e-32	3.0124e-30	0.273783	0.118579
CD8-TRM	RETREG1	11.7124	1.29299	1.10097e-31	8.70365e-30	0.261724	0.109925
CD8-TRM	A1BG	11.6997	1.05918	1.2794e-31	1.00412e-29	0.326038	0.183511
CD8-TRM	CD9	11.2339	0.761655	2.77876e-29	2.03401e-27	0.329165	0.17673
CD8-MAIT	SLC4A10	17.2118	4.92045	2.1652e-66	2.2415e-63	0.519704	0.0236662
CD8-MAIT	A2M-AS1	12.0629	2.43681	1.65906e-33	4.09864e-31	0.440887	0.0884124
CD8-MAIT	JAML	11.0502	1.60001	2.1873e-28	4.61668e-26	0.512315	0.186921
CD8-MAIT	DPP4	10.6235	2.4016	2.31754e-26	4.53904e-24	0.389163	0.0799833
CD8-MAIT	LST1	10.2567	1.9769	1.10432e-24	2.00065e-22	0.416256	0.124537
CD8-MAIT	ZBTB16	10.0936	1.929	5.89778e-24	1.03401e-21	0.408867	0.111199
CD8-MAIT	IL18RAP	9.71997	2.02056	2.47843e-22	4.1447e-20	0.3867	0.100222
CD8-MAIT	CD40LG	9.48861	1.51516	2.34138e-21	3.74276e-19	0.423645	0.1363
CD8-MAIT	TNFRSF25	9.11541	1.58231	7.83745e-20	1.17508e-17	0.408867	0.143664
CD8-MAIT	AQP3	8.96299	1.56556	3.15996e-19	4.57983e-17	0.416256	0.158716
CD8-MAIT	PRR5	8.46052	1.66698	2.66197e-17	3.59449e-15	0.384236	0.143572
CD8-MAIT	CDC14A	8.41973	1.4082	3.77341e-17	4.97175e-15	0.426108	0.18669
CD8-MAIT	LTK	8.4178	4.30004	3.83629e-17	5.02416e-15	0.258621	0.0156076
CD8-MAIT	ATF7IP2	8.38795	1.44465	4.94684e-17	6.43978e-15	0.41133	0.170526
CD8-MAIT	CERK	8.28814	1.54601	1.15035e-16	1.46249e-14	0.391626	0.15728
CD8-MAIT	SYTL2	8.16221	1.42925	3.28959e-16	4.1101e-14	0.3867	0.143664
CD8-MAIT	LINC00987	8.15248	2.48846	3.56523e-16	4.42904e-14	0.288177	0.0500185
CD8-MAIT	IL18R1	8.03243	1.58329	9.55613e-16	1.15417e-13	0.364532	0.130558
CD8-MAIT	CCR6	7.86737	1.60189	3.62168e-15	4.21045e-13	0.347291	0.117775
CD8-MAIT	PLCB1	7.6761	1.50426	1.64002e-14	1.84736e-12	0.359606	0.133429
CD8-MAIT	ELK3	7.62798	1.45996	2.38461e-14	2.65851e-12	0.366995	0.151723
CD8-MAIT	TOB1	7.45166	1.3653	9.21742e-14	1.00193e-11	0.376847	0.163209
CD8-MAIT	LINC00649	7.43244	1.23244	1.0661e-13	1.14738e-11	0.3867	0.165293
CD8-MAIT	ADRB2	6.48045	1.38534	9.14511e-11	8.5696e-09	0.305419	0.110041
CD8-MAIT	KLF3	6.39477	1.23519	1.6079e-10	1.49384e-08	0.342365	0.15816
CD8-MAIT	HPGD	6.37795	1.57278	1.79477e-10	1.64416e-08	0.285714	0.10138
CD8-MAIT	KDSR	6.12385	1.5434	9.13421e-10	7.72676e-08	0.285714	0.110782
CD8-MAIT	KIF5C	5.94014	2.61574	2.84781e-09	2.34513e-07	0.20936	0.0376991
CD8-MAIT	ADAM12	5.85122	2.98333	4.87972e-09	3.9584e-07	0.194581	0.0251482
CD8-MAIT	TMEM71	5.68117	1.22678	1.33778e-08	1.05374e-06	0.293103	0.124305
CD8-MAIT	S1PR1	5.60815	1.51285	2.04495e-08	1.58211e-06	0.251232	0.0864672
CD8-MAIT	MYC	5.50278	1.25224	3.73858e-08	2.79301e-06	0.285714	0.126667
CD8-MAIT	B3GALT2	5.37451	2.81822	7.67899e-08	5.55229e-06	0.182266	0.0268155
CD8-MAIT	IL23R	5.36505	3.07291	8.0928e-08	5.82575e-06	0.174877	0.0190811
CD8-MAIT	FLT3LG	5.22657	0.949981	1.7268e-07	1.19513e-05	0.327586	0.172425
CD8-MAIT	TMEM63A	5.18283	1.03664	2.18541e-07	1.47092e-05	0.293103	0.139635
CD8-MAIT	NRIP1	5.12295	1.21367	3.00787e-07	1.97556e-05	0.275862	0.129215
CD8-MAIT	S1PR5	5.11422	1.20215	3.15038e-07	2.05674e-05	0.236453	0.0797981
CD8-MAIT	CD28	5.06283	1.02205	4.13071e-07	2.66474e-05	0.268473	0.113375
CD8-MAIT	APOL3	5.05811	1.08632	4.23436e-07	2.71549e-05	0.293103	0.147277
CD8-MAIT	COLQ	5.03625	2.63318	4.74741e-07	3.02665e-05	0.172414	0.025704
CD8-MAIT	TLE1	4.99618	1.23571	5.84766e-07	3.63223e-05	0.26601	0.122638
CD8-MAIT	AC006369.1	4.91846	1.78402	8.72265e-07	5.23841e-05	0.197044	0.0521953
plasma cell	MZB1	33.2333	6.41839	3.55673e-242	7.73233e-238	0.972569	0.121961
plasma cell	DERL3	32.6073	7.37581	3.23005e-233	2.34071e-229	0.955112	0.0224568
plasma cell	PRDX4	31.1716	4.46873	2.5881e-213	8.03789e-210	0.945137	0.14627
plasma cell	JCHAIN	30.5924	8.81152	1.54497e-205	3.73197e-202	0.902743	0.0433857
plasma cell	FCRL5	30.0225	5.84887	4.99473e-198	8.35273e-195	0.895262	0.0182433
plasma cell	TNFRSF17	27.2009	6.71296	6.34243e-163	3.0641e-160	0.802993	0.00972357
plasma cell	ELL2	26.321	4.23858	1.10213e-152	3.92793e-150	0.812968	0.0323656
plasma cell	POU2AF1	26.2152	4.27913	1.78365e-151	5.78754e-149	0.810474	0.033338
plasma cell	IGHG1	26.1435	8.47249	1.16748e-150	3.62586e-148	0.805486	0.0805204
plasma cell	GAS6	25.5921	5.0388	1.86721e-144	4.95038e-142	0.76808	0.0156966
plasma cell	CD79A	25.523	2.94951	1.09608e-143	2.87094e-141	0.86783	0.0811224
plasma cell	IGHG3	25.2323	7.13955	1.77267e-140	4.23492e-138	0.785536	0.0665833
plasma cell	TXNDC11	25.1273	2.96695	2.50297e-139	5.85103e-137	0.862843	0.0926518
plasma cell	SDC1	25.1014	8.12299	4.80076e-139	1.1103e-136	0.733167	0.00194471
plasma cell	TENT5C	25.0403	2.98551	2.22864e-138	4.94394e-136	0.875312	0.120619
plasma cell	PLPP5	24.994	2.76828	7.10606e-138	1.52956e-135	0.895262	0.131546
plasma cell	LY96	24.5635	4.0102	3.10359e-133	5.97097e-131	0.765586	0.0343103
plasma cell	DNAJB9	24.2336	2.7766	9.8493e-130	1.81461e-127	0.875312	0.143214
plasma cell	MEF2C	24.2184	2.55142	1.42464e-129	2.60266e-127	0.815461	0.0683891
plasma cell	IGLC2	23.8852	6.37605	4.36876e-126	7.59815e-124	0.830424	0.1628
plasma cell	SPAG4	23.4246	6.49221	2.39982e-121	3.78059e-119	0.688279	0.00449136
plasma cell	IGHG4	23.2742	6.31826	8.09162e-120	1.23015e-117	0.72818	0.0524147
plasma cell	EAF2	23.1803	3.38039	7.19227e-119	1.06367e-116	0.740648	0.0457471
plasma cell	UBE2J1	23.1605	2.80867	1.14017e-118	1.66358e-116	0.845387	0.155253
plasma cell	SIL1	23.0296	2.54662	2.35579e-117	3.32564e-115	0.802993	0.0863083
plasma cell	TP53INP1	22.9689	2.91336	9.53826e-117	1.31242e-114	0.793017	0.0896884
plasma cell	PDK1	22.8151	2.81738	3.25065e-115	4.33554e-113	0.780549	0.0813539
plasma cell	CPNE5	22.6177	3.34972	2.90042e-113	3.84482e-111	0.713217	0.0358383
plasma cell	CKAP4	22.3758	4.05408	6.76722e-111	8.80955e-109	0.680798	0.0194008
plasma cell	SPATS2	22.2842	2.72402	5.25805e-110	6.68479e-108	0.753117	0.0696856
plasma cell	RALGPS2	22.0521	1.86757	9.11202e-108	1.11918e-105	0.798005	0.0954299
plasma cell	AC012236.1	21.8297	6.6846	1.21213e-105	1.4559e-103	0.640898	0.00398203
plasma cell	JSRP1	21.7099	7.57305	1.65356e-104	1.95372e-102	0.63591	0.00393573
plasma cell	PIM2	21.6401	2.55429	7.52798e-104	8.79883e-102	0.800499	0.137982
plasma cell	TXNDC15	21.1336	2.16608	3.90636e-99	4.26755e-97	0.850374	0.182711
plasma cell	ST6GAL1	21.0652	2.03868	1.65797e-98	1.78437e-96	0.852868	0.168959
plasma cell	MEI1	20.5884	1.9335	3.48859e-94	3.54401e-92	0.795511	0.125064
plasma cell	NANS	20.3855	1.9306	2.24722e-92	2.2308e-90	0.760599	0.106635
plasma cell	CHPF	20.2882	2.7657	1.63455e-91	1.5935e-89	0.658354	0.0446821
plasma cell	SELENOM	20.2533	2.18036	3.32429e-91	3.22634e-89	0.820449	0.195675
plasma cell	IGLV3-1	20.1266	11.0993	4.31808e-90	4.08153e-88	0.586035	0.000370422
plasma cell	CREB3L2	20.0926	2.00044	8.57357e-90	8.06881e-88	0.835411	0.185767
plasma cell	CPEB4	19.9584	2.2219	1.26638e-88	1.16657e-86	0.755611	0.126731
plasma cell	GNG7	19.7713	2.80788	5.25829e-87	4.70433e-85	0.638404	0.0418114
plasma cell	SRPRB	19.7015	1.60425	2.09247e-86	1.86436e-84	0.830424	0.161782
plasma cell	PDIA4	19.6761	1.88311	3.4563e-86	3.05447e-84	0.842893	0.195398
plasma cell	CTSH	19.5618	1.82612	3.27522e-85	2.84813e-83	0.745636	0.117516
plasma cell	IGHG2	19.4144	6.05803	5.82882e-84	4.96935e-82	0.603491	0.0355142
plasma cell	CHID1	19.2828	1.60667	7.48555e-83	6.30759e-81	0.773067	0.133213
plasma cell	IGHA1	19.2404	5.55247	1.69782e-82	1.4142e-80	0.63591	0.0746863
plasma cell	HSPA13	18.9664	1.87957	3.23525e-80	2.62442e-78	0.690773	0.0895495
plasma cell	CLIC4	18.8358	3.38538	3.84483e-79	3.06178e-77	0.581047	0.0218549
plasma cell	ARSA	18.7335	2.19802	2.63938e-78	2.05664e-76	0.633416	0.0571376
plasma cell	COBLL1	18.7173	2.85439	3.5785e-78	2.75351e-76	0.593516	0.0325971
plasma cell	CAV1	18.7172	3.41433	3.58437e-78	2.75351e-76	0.581047	0.0244478
plasma cell	MARCKS	18.5088	1.84742	1.75214e-76	1.31805e-74	0.678304	0.0927907
plasma cell	FNDC3B	18.5064	1.47483	1.83401e-76	1.37488e-74	0.76808	0.147937
plasma cell	PECAM1	18.4103	1.84943	1.08674e-75	8.00874e-74	0.725686	0.130018
plasma cell	ST6GALNAC4	18.3681	2.04078	2.36502e-75	1.73701e-73	0.650873	0.0763532
plasma cell	METTL7A	18.2644	2.06769	1.59012e-74	1.14848e-72	0.63591	0.0709358
plasma cell	ALG5	18.1966	1.50968	5.48936e-74	3.91274e-72	0.817955	0.188498
plasma cell	SYVN1	18.048	1.74921	8.18664e-73	5.74121e-71	0.653367	0.0835301
plasma cell	SLAMF7	18.0342	1.25297	1.05047e-72	7.31962e-71	0.837905	0.196879
plasma cell	IGLC3	17.992	6.46607	2.25006e-72	1.55784e-70	0.57606	0.0623235
plasma cell	CALU	17.9369	1.47635	6.0771e-72	4.18089e-70	0.723192	0.129138
plasma cell	MAN1A1	17.8273	1.66769	4.33714e-71	2.91918e-69	0.735661	0.148817
plasma cell	FNDC3A	17.8124	1.42614	5.66284e-71	3.79969e-69	0.783042	0.171413
plasma cell	MANEA	17.6632	1.84751	8.05227e-70	5.3534e-68	0.628429	0.0759828
plasma cell	TXNDC5	17.5345	5.5359	7.81755e-69	5.1501e-67	0.518703	0.00638978
plasma cell	FCGR2B	17.4329	2.30937	4.64591e-68	3.0331e-66	0.571072	0.0421818
plasma cell	LRRC59	17.4138	1.53777	6.48457e-68	4.20819e-66	0.690773	0.120943
plasma cell	TCF4	17.3416	1.69016	2.28242e-67	1.4724e-65	0.658354	0.102699
plasma cell	GMPPB	17.3233	1.64369	3.13835e-67	2.01857e-65	0.650873	0.0981618
plasma cell	ANKRD28	17.2957	1.28053	5.06513e-67	3.23871e-65	0.755611	0.165856
plasma cell	TPD52	17.2727	1.38768	7.55436e-67	4.8021e-65	0.805486	0.196648
plasma cell	PDXK	17.2457	1.19545	1.20548e-66	7.59626e-65	0.760599	0.162152
plasma cell	C11orf24	17.1378	2.14262	7.7572e-66	4.83213e-64	0.566085	0.0447747
plasma cell	PNOC	17.0084	3.55093	7.11383e-65	4.3936e-63	0.518703	0.0161597
plasma cell	CCDC88A	16.951	1.81932	1.89151e-64	1.15835e-62	0.640898	0.102283
plasma cell	B4GALT7	16.8949	1.59312	4.90512e-64	2.99543e-62	0.608479	0.0759365
plasma cell	FBXW7	16.8664	1.3629	7.94579e-64	4.8387e-62	0.785536	0.196925
plasma cell	PGM3	16.8364	1.91773	1.32061e-63	7.99724e-62	0.57606	0.0576006
plasma cell	TOR3A	16.8046	1.53249	2.2583e-63	1.35249e-61	0.665835	0.119091
plasma cell	BHLHE41	16.6571	3.14582	2.68781e-62	1.59218e-60	0.513716	0.0199102
plasma cell	SEC24A	16.6286	2.09646	4.32727e-62	2.54946e-60	0.571072	0.0600546
plasma cell	UAP1	16.486	1.66681	4.62791e-61	2.67582e-59	0.600998	0.0813539
plasma cell	BRSK1	16.4589	4.83089	7.24598e-61	4.17845e-59	0.488778	0.00699171
plasma cell	TRAM2	16.4583	2.96372	7.31661e-61	4.20802e-59	0.518703	0.0280595
plasma cell	QPRT	16.4266	2.93999	1.23329e-60	7.07431e-59	0.513716	0.0246331
plasma cell	SLC35B1	16.383	1.30606	2.52911e-60	1.44312e-58	0.700748	0.147567
plasma cell	PTP4A3	16.3725	4.15689	3.00793e-60	1.70293e-58	0.508728	0.028754
plasma cell	ERGIC3	16.3431	1.16925	4.86818e-60	2.74894e-58	0.783042	0.195768
plasma cell	RAB30	16.3136	2.14972	7.89417e-60	4.4461e-58	0.553616	0.0544983
plasma cell	EIF2AK4	16.2404	1.38508	2.61241e-59	1.46754e-57	0.628429	0.102931
plasma cell	SEC61A1	16.2161	1.13947	3.88262e-59	2.16431e-57	0.758105	0.184887
plasma cell	TSPAN13	16.1363	2.0905	1.41743e-58	7.84093e-57	0.528678	0.0399593
plasma cell	FUCA2	16.0746	1.37753	3.84172e-58	2.10376e-56	0.605985	0.0905218
plasma cell	MCEE	16.0038	1.53517	1.20186e-57	6.49961e-56	0.568579	0.0682039
plasma cell	CISD2	15.9965	1.055	1.35063e-57	7.28605e-56	0.758105	0.184794
plasma cell	PAIP2B	15.9736	3.22416	1.95057e-57	1.04447e-55	0.501247	0.0260684
plasma cell	FUT8	15.9314	1.13785	3.8391e-57	2.04564e-55	0.700748	0.154559
plasma cell	TMEM205	15.9149	1.06643	4.99176e-57	2.64685e-55	0.678304	0.137241
plasma cell	ARL1	15.8137	0.961303	2.504e-56	1.31173e-54	0.755611	0.183961
plasma cell	IGF1	15.8084	2.55571	2.72264e-56	1.42284e-54	0.511222	0.0360698
plasma cell	DENND5B	15.7901	3.8021	3.63762e-56	1.89191e-54	0.478803	0.0137519
plasma cell	AC078883.1	15.7619	3.51815	5.68605e-56	2.95023e-54	0.481297	0.016067
plasma cell	CADM1	15.7605	3.62289	5.81934e-56	3.0122e-54	0.483791	0.0181507
plasma cell	SEC24D	15.7205	1.50553	1.09525e-55	5.64234e-54	0.593516	0.092837
plasma cell	EDEM2	15.6992	1.34641	1.53221e-55	7.85619e-54	0.618454	0.107515
plasma cell	C12orf45	15.6722	1.40256	2.34371e-55	1.1877e-53	0.648379	0.13062
plasma cell	SPINT2	15.6491	1.35512	3.36778e-55	1.69874e-53	0.625935	0.113025
plasma cell	CHST15	15.6139	3.56677	5.8514e-55	2.94466e-53	0.473815	0.0135667
plasma cell	KLHL6	15.5993	0.998082	7.35504e-55	3.69281e-53	0.680798	0.146039
plasma cell	ZBP1	15.4782	1.06913	4.86548e-54	2.42604e-52	0.703242	0.165579
plasma cell	SCARB2	15.4656	1.21982	5.92291e-54	2.93982e-52	0.620948	0.113071
plasma cell	ITGA6	15.4426	1.70732	8.45862e-54	4.18885e-52	0.600998	0.108209
plasma cell	LAX1	15.4371	1.17398	9.21324e-54	4.55218e-52	0.648379	0.131176
plasma cell	LARP1B	15.3687	1.5114	2.65303e-53	1.30491e-51	0.571072	0.0846414
plasma cell	TRIB1	15.3534	4.03957	3.35951e-53	1.64866e-51	0.46384	0.0125943
plasma cell	WIPI1	15.3269	1.18719	5.05873e-53	2.47695e-51	0.600998	0.102005
plasma cell	BASP1	15.3128	1.34689	6.28447e-53	3.07021e-51	0.55611	0.0748252
plasma cell	SLC39A7	15.246	1.12496	1.75069e-52	8.4766e-51	0.628429	0.122054
plasma cell	FAM92B	15.1687	6.68166	5.702e-52	2.73646e-50	0.44389	0.00185211
plasma cell	MCUR1	15.1657	1.26308	5.96897e-52	2.85827e-50	0.600998	0.107237
plasma cell	HLA-DOB	15.1378	2.1119	9.12662e-52	4.36072e-50	0.491272	0.0350049
plasma cell	SLC25A4	15.1283	1.75526	1.05309e-51	5.02065e-50	0.516209	0.0515812
plasma cell	KCNN3	15.113	6.72453	1.32976e-51	6.31201e-50	0.441397	0.00115757
plasma cell	TMEM19	15.0301	1.19604	4.66035e-51	2.18353e-49	0.566085	0.0852896
plasma cell	DEF8	15.0244	1.64375	5.07921e-51	2.37467e-49	0.531172	0.0643145
plasma cell	FICD	14.9523	2.27637	1.50412e-50	6.97217e-49	0.491272	0.0395888
plasma cell	GRN	14.9435	0.926925	1.71661e-50	7.94024e-49	0.638404	0.132379
plasma cell	SERPINI1	14.885	1.97182	4.12768e-50	1.89716e-48	0.508728	0.0525536
plasma cell	NME1	14.8685	1.00249	5.2809e-50	2.42208e-48	0.695761	0.171227
plasma cell	FBH1	14.8625	1.0733	5.77073e-50	2.64117e-48	0.598504	0.110386
plasma cell	ODF3B	14.8527	2.54194	6.68092e-50	3.05133e-48	0.476309	0.0311154
plasma cell	MBNL2	14.8176	1.1247	1.12677e-49	5.13541e-48	0.625935	0.129787
plasma cell	LINC02362	14.7492	7.29057	3.11226e-49	1.40667e-47	0.431421	0.0017595
plasma cell	NME4	14.6061	1.32543	2.56657e-48	1.14339e-46	0.526185	0.0679261
plasma cell	NENF	14.6046	0.901297	2.62628e-48	1.16759e-46	0.740648	0.199148
plasma cell	NEU1	14.5811	1.2011	3.70392e-48	1.63998e-46	0.553616	0.0865398
plasma cell	CASP10	14.5452	1.09931	6.26441e-48	2.75128e-46	0.61596	0.129648
plasma cell	ZNF593	14.475	1.03209	1.74298e-47	7.60893e-46	0.583541	0.10733
plasma cell	AIG1	14.4277	1.58194	3.46272e-47	1.50259e-45	0.513716	0.0648701
plasma cell	DNAJB11	14.306	1.00791	2.00667e-46	8.62155e-45	0.665835	0.167616
plasma cell	CEP128	14.2147	2.2209	7.42871e-46	3.14221e-44	0.473815	0.0437098
plasma cell	U62317.5	14.187	6.22686	1.10306e-45	4.64739e-44	0.416459	0.00277816
plasma cell	ALG14	14.1705	2.37316	1.39454e-45	5.86407e-44	0.453865	0.0298653
plasma cell	C1GALT1C1	14.1625	0.903889	1.56426e-45	6.55241e-44	0.600998	0.124415
plasma cell	HYI	14.1585	1.40545	1.65457e-45	6.91738e-44	0.501247	0.0613511
plasma cell	ARMCX3	14.1324	0.846423	2.39671e-45	1.00008e-43	0.700748	0.188591
plasma cell	NUGGC	14.022	2.54379	1.14397e-44	4.71019e-43	0.441397	0.0237996
plasma cell	ADA2	14.0024	0.926545	1.50783e-44	6.18497e-43	0.598504	0.128166
plasma cell	CTBS	13.9736	0.644755	2.26011e-44	9.20126e-43	0.65586	0.157568
plasma cell	NT5DC2	13.9709	3.02881	2.34766e-44	9.53982e-43	0.438903	0.0244015
plasma cell	TMEM39A	13.944	1.41202	3.4241e-44	1.38622e-42	0.491272	0.0596842
plasma cell	HSD17B8	13.8852	1.38466	7.78635e-44	3.11168e-42	0.496259	0.0638515
plasma cell	FAM174A	13.8671	1.65896	1.00311e-43	3.98677e-42	0.478803	0.0525073
plasma cell	YIF1A	13.6999	0.66084	1.01636e-42	3.96691e-41	0.670823	0.172802
plasma cell	STT3A	13.6184	1.1599	3.11153e-42	1.20364e-40	0.531172	0.0940408
plasma cell	IKBIP	13.5883	0.686054	4.70101e-42	1.80565e-40	0.640898	0.158494
plasma cell	HEXB	13.568	0.733504	6.19819e-42	2.37652e-40	0.583541	0.12423
plasma cell	EBAG9	13.5663	0.57661	6.34449e-42	2.42833e-40	0.628429	0.148817
plasma cell	SEMA4A	13.559	2.97835	7.00638e-42	2.67226e-40	0.418953	0.0178729
plasma cell	BET1	13.5421	0.876415	8.81848e-42	3.35164e-40	0.558603	0.110432
plasma cell	FCGRT	13.5115	1.04732	1.33783e-41	5.06698e-40	0.53616	0.0978377
plasma cell	MDK	13.5006	1.80496	1.5506e-41	5.86262e-40	0.468828	0.0546372
plasma cell	SLC38A10	13.4273	0.68513	4.18284e-41	1.56246e-39	0.610973	0.145159
plasma cell	ICAM2	13.322	0.565744	1.72473e-40	6.39856e-39	0.685786	0.186415
plasma cell	CDK14	13.2298	2.94678	5.90637e-40	2.17267e-38	0.411471	0.0196787
plasma cell	PDIA5	13.216	3.21748	7.09132e-40	2.60414e-38	0.40399	0.0143075
plasma cell	SLC1A4	13.1886	1.75089	1.02077e-39	3.74226e-38	0.461347	0.0567671
plasma cell	SLC44A1	13.1832	0.559932	1.09639e-39	4.00595e-38	0.610973	0.150206
plasma cell	SLC17A9	13.0746	3.53133	4.59809e-39	1.65501e-37	0.396509	0.0119461
plasma cell	TBCEL	13.0603	3.16412	5.55183e-39	1.99169e-37	0.416459	0.0293096
plasma cell	TBC1D9	13.0269	2.64738	8.59894e-39	3.06964e-37	0.408978	0.0220401
plasma cell	PGRMC2	13.0191	0.66998	9.52612e-39	3.39505e-37	0.608479	0.151132
plasma cell	RAB1A	12.9601	0.539375	2.05972e-38	7.3048e-37	0.67581	0.189378
plasma cell	ADI1	12.9169	0.566643	3.61593e-38	1.2803e-36	0.660848	0.18197
plasma cell	ACBD3	12.9026	0.66441	4.35255e-38	1.53861e-36	0.670823	0.19174
plasma cell	YIPF2	12.8218	1.06981	1.23762e-37	4.35369e-36	0.483791	0.0777423
plasma cell	NCF4	12.7992	0.604448	1.65647e-37	5.81771e-36	0.551122	0.118489
plasma cell	HLA-DMA	12.794	0.570248	1.77166e-37	6.21223e-36	0.620948	0.164143
plasma cell	SEC23B	12.7641	0.800112	2.60251e-37	9.09622e-36	0.518703	0.100755
plasma cell	PARM1	12.6248	4.26113	1.54148e-36	5.36189e-35	0.376559	0.00689911
plasma cell	NAGLU	12.6194	0.759693	1.65017e-36	5.7308e-35	0.488778	0.0833449
B cells	MS4A1	63.4532	7.35597	0	0	0.973377	0.0337276
B cells	CD79A	62.0882	7.36424	0	0	0.953896	0.0308437
B cells	HLA-DQB1	61.1193	5.4948	0	0	0.954545	0.106511
B cells	HLA-DQA1	60.3516	6.20177	0	0	0.935714	0.0611986
B cells	BANK1	58.2177	7.60898	0	0	0.892857	0.0221429
B cells	CD79B	54.4268	4.50148	0	0	0.877273	0.131733
B cells	RALGPS2	52.5584	5.70942	0	0	0.822727	0.054453
B cells	MEF2C	51.388	6.549	0	0	0.796753	0.0282041
B cells	HLA-DRB5	51.0249	4.41018	0	0	0.838312	0.12577
B cells	MARCH1	50.8945	7.80399	0	0	0.781169	0.00943396
B cells	LINC00926	50.0968	8.4149	0	0	0.767532	0.00601232
B cells	BCL11A	48.6086	8.34775	0	0	0.744805	0.00523023
B cells	TNFRSF13C	47.5206	7.14137	0	0	0.732468	0.0161306
B cells	HLA-DMB	45.5728	4.12906	0	0	0.753896	0.0922866
B cells	HLA-DMA	44.91	3.68875	0	0	0.765584	0.127823
B cells	POU2F2	44.7877	3.43414	0	0	0.783117	0.159742
B cells	VPREB3	43.9196	8.883	0	0	0.672727	0.00625672
B cells	IGHM	43.3451	7.78109	0	0	0.670779	0.0199433
B cells	CD22	41.7536	8.90665	0	0	0.638961	0.0027862
B cells	BASP1	41.0711	5.21839	0	0	0.652597	0.0407664
B cells	TCF4	40.9364	4.27561	0	0	0.674675	0.0705348
B cells	ARHGAP24	40.8522	8.33182	0	0	0.625974	0.00400821
B cells	STX7	40.4065	3.08694	0	0	0.733766	0.177681
B cells	SWAP70	39.8943	4.0762	0	0	0.66039	0.0733698
B cells	SMIM14	38.3143	3.59961	0	0	0.662987	0.120197
B cells	HVCN1	38.1249	3.95558	0	0	0.637662	0.0771336
B cells	LINC02397	38.004	9.45844	0	0	0.581169	0.00219963
B cells	CD24	36.8453	3.88118	3.47723e-297	6.93531e-295	0.621429	0.0767915
B cells	ADAM28	36.6925	4.32893	9.60279e-295	1.88076e-292	0.602597	0.0556262
B cells	CTSH	34.9035	3.49652	6.58929e-267	1.07708e-264	0.604545	0.0931665
B cells	CD40	34.7256	5.76153	3.23568e-264	5.24953e-262	0.544156	0.0193079
B cells	GAPT	34.3967	7.30312	2.82732e-259	4.42201e-257	0.529221	0.00527911
B cells	SELL	34.201	2.5715	2.3336e-256	3.62374e-254	0.674675	0.165021
B cells	BLK	34.1578	6.21617	1.02404e-255	1.57892e-253	0.530519	0.0113403
B cells	LY86	33.3837	7.51726	2.36639e-244	3.47604e-242	0.512987	0.00435038
B cells	IRF8	32.9395	3.29589	5.98103e-238	8.55445e-236	0.57987	0.0932642
B cells	CYBB	32.9063	5.36684	1.7885e-237	2.5413e-235	0.518831	0.0220452
B cells	MARCKS	32.5803	3.8395	7.79243e-233	1.07903e-230	0.551299	0.0697527
B cells	SPIB	32.454	7.62495	4.75313e-231	6.45831e-229	0.498701	0.00444814
B cells	CIITA	31.5843	4.9662	6.06914e-219	7.99655e-217	0.503247	0.0245381
B cells	IGHD	30.9731	7.34414	1.24137e-210	1.53338e-208	0.475325	0.00351941
B cells	AFF3	29.8476	4.83886	9.41792e-196	1.11275e-193	0.476623	0.0233161
B cells	PDLIM1	29.7622	3.02871	1.20572e-194	1.41689e-192	0.537662	0.0912113
B cells	GNG7	29.4172	5.49015	3.31287e-190	3.7317e-188	0.464286	0.021703
B cells	FCRLA	29.4036	8.23207	4.93355e-190	5.52863e-188	0.451948	0.00552351
B cells	TLR10	29.2223	8.38612	1.01095e-187	1.12133e-185	0.448052	0.0030306
B cells	DAPP1	28.6355	3.48619	2.42945e-180	2.5639e-178	0.496104	0.073712
B cells	TMEM154	28.572	2.63515	1.49801e-179	1.57327e-177	0.546104	0.126845
B cells	LYL1	28.5715	4.55189	1.51866e-179	1.58729e-177	0.462338	0.0329455
B cells	BTK	28.1953	6.61434	6.67455e-175	6.71781e-173	0.437662	0.0106071
B cells	IFT57	27.9886	2.99483	2.23619e-172	2.19976e-170	0.512338	0.10348
B cells	BLNK	27.4906	7.0764	2.27535e-166	2.19849e-164	0.425325	0.00874963
B cells	HLA-DOB	27.3231	6.09806	2.2581e-164	2.14371e-162	0.427273	0.0144198
B cells	SCIMP	27.198	5.66024	6.86097e-163	6.4292e-161	0.425974	0.0123179
B cells	CCDC50	26.9332	2.84637	8.97522e-160	8.26785e-158	0.504545	0.116483
B cells	PAX5	26.8311	9.21173	1.40079e-158	1.28494e-156	0.41039	0.00141754
B cells	FAM129C	26.648	8.06659	1.88734e-156	1.70961e-154	0.408442	0.00215075
B cells	CD19	26.4527	8.28375	3.39442e-154	3.03682e-152	0.407143	0.00576791
B cells	IGLC2	26.3279	3.40239	9.20269e-153	8.19945e-151	0.509091	0.149819
B cells	QRSL1	26.2421	3.03587	8.78798e-152	7.79799e-150	0.472727	0.0842702
B cells	POU2AF1	25.9267	5.10001	3.33182e-148	2.87436e-146	0.411688	0.0200899
B cells	TNFRSF13B	25.8829	5.57327	1.03831e-147	8.85208e-146	0.406494	0.0135888
B cells	COBLL1	25.8185	5.9463	5.49643e-147	4.64951e-145	0.405195	0.015544
B cells	AIM2	25.7194	4.65187	7.09265e-146	5.95345e-144	0.415584	0.0286441
B cells	PLEKHF2	25.5433	3.06398	6.52391e-144	5.37234e-142	0.458442	0.0771336
B cells	DRAM2	25.3681	2.24864	5.68157e-142	4.60886e-140	0.523377	0.160377
B cells	CYB561A3	25.3345	2.72113	1.3319e-141	1.07242e-139	0.477922	0.110764
B cells	FCRL2	25.3125	7.39118	2.32832e-141	1.86095e-139	0.390909	0.00679441
B cells	P2RX5	24.9215	3.69268	4.35549e-137	3.35774e-135	0.423377	0.0488806
B cells	HLA-DQA2	24.7894	4.79928	1.1656e-135	8.89129e-134	0.398701	0.0242937
B cells	FCRL1	24.7509	9.19638	3.03319e-135	2.29761e-133	0.378571	0.00117314
B cells	FGD2	24.5643	5.2822	3.04016e-133	2.26346e-131	0.388312	0.0156907
B cells	JCHAIN	24.5086	2.95736	1.19463e-132	8.80384e-131	0.40974	0.0326523
B cells	CPNE5	23.9671	5.00964	6.13393e-127	4.40105e-125	0.383766	0.022925
B cells	IGHG1	23.7912	2.21135	4.12303e-125	2.93884e-123	0.431169	0.0683351
B cells	PKIG	23.5425	4.47966	1.49755e-122	1.06048e-120	0.37987	0.0221918
B cells	FAM30A	23.3114	5.37403	3.40063e-120	2.37716e-118	0.368831	0.0160817
B cells	HHEX	23.1182	5.32757	3.03607e-118	2.08874e-116	0.363636	0.0112425
B cells	LYN	22.8454	2.2643	1.62287e-115	1.06913e-113	0.465584	0.125819
B cells	IGLC3	22.6184	3.9775	2.85601e-113	1.84242e-111	0.383766	0.0481963
B cells	FCER2	22.5142	8.84054	3.01399e-112	1.92153e-110	0.344805	0.00166194
B cells	MARCKSL1	22.4256	2.50847	2.21386e-111	1.39911e-109	0.449351	0.125917
B cells	SYNGR2	22.2025	2.06972	3.24511e-109	2.0331e-107	0.481818	0.162968
B cells	FCGR2B	21.8806	4.32073	3.97859e-106	2.43647e-104	0.358442	0.0287418
B cells	LINC01857	21.7313	10.8952	1.03919e-104	6.27554e-103	0.331818	0.000342164
B cells	IGHG3	21.5021	2.50391	1.48799e-102	8.81442e-101	0.382468	0.0568971
B cells	IGHA1	21.4395	3.1043	5.71712e-102	3.37745e-100	0.37987	0.0627139
B cells	IFNGR2	21.4347	3.49592	6.34916e-102	3.74067e-100	0.368831	0.0478541
B cells	OSBPL10	21.3964	5.73887	1.44258e-101	8.47616e-100	0.335714	0.0109493
B cells	FCHSD2	20.6183	2.39827	1.88056e-94	1.05369e-92	0.40974	0.104116
B cells	MTSS1	20.5907	2.73515	3.32366e-94	1.85749e-92	0.382468	0.0700948
B cells	CD72	20.5794	4.53426	4.20155e-94	2.34209e-92	0.333766	0.0227295
B cells	RNASE6	20.3154	4.24306	9.40627e-92	5.12512e-90	0.335065	0.0283019
B cells	CD180	19.9337	6.64865	2.07765e-88	1.09631e-86	0.31039	0.00821195
B cells	HLA-DOA	19.8935	5.68983	4.62827e-88	2.42455e-86	0.31039	0.00708769
B cells	RASGRP2	19.8557	1.73613	9.8393e-88	5.12965e-86	0.465584	0.169323
B cells	SNX22	19.8446	6.40831	1.22754e-87	6.38438e-86	0.307143	0.00469254
B cells	WDFY4	19.7885	8.10365	3.74297e-87	1.94206e-85	0.303896	0.00249291
B cells	TCL1A	19.7104	10.0878	1.75715e-86	9.03085e-85	0.301299	0.00078209
B cells	PHACTR1	19.6562	3.86596	5.11943e-86	2.60647e-84	0.331169	0.0362205
B cells	LINC01781	19.3724	8.57809	1.32059e-83	6.55472e-82	0.298052	0.00342164
B cells	ST6GAL1	19.3211	1.80565	3.56745e-83	1.75865e-81	0.445455	0.16155
B cells	RIC3	19.1208	2.51297	1.69629e-81	8.21321e-80	0.365584	0.0768892
B cells	TSPAN13	18.9569	4.36946	3.87565e-80	1.84773e-78	0.312987	0.0289862
B cells	CLECL1	18.7338	3.79919	2.62675e-78	1.24142e-76	0.312338	0.027422
B cells	ID3	18.5845	1.59268	4.28995e-77	2.00136e-75	0.454545	0.175579
B cells	MAP3K1	18.5398	1.86336	9.85065e-77	4.58572e-75	0.414935	0.139261
B cells	CCR7	18.0217	1.60337	1.3155e-72	5.86046e-71	0.420779	0.135106

## Sheet: epithelial
Supplementary Table 2. Markers genes expressed by each cell subpopulation
cluster	gene	score	logfc	pval	pval_fdr	in_group_fraction	out_group_fraction
MUC5B+ epithelial	MUC5B	54.903	8.45984	0	0	0.947627	0.0963222
MUC5B+ epithelial	SAA1	51.5888	6.89975	0	0	0.91653	0.139992
MUC5B+ epithelial	LTF	51.0711	7.69593	0	0	0.893617	0.075363
MUC5B+ epithelial	BPIFB1	49.1286	10.1952	0	0	0.844517	0.0270041
MUC5B+ epithelial	TFF3	48.9552	7.90498	0	0	0.86743	0.155867
MUC5B+ epithelial	SAA2	42.7385	6.37406	0	0	0.761047	0.0693181
MUC5B+ epithelial	CFD	41.7622	4.86437	0	0	0.786416	0.1766
MUC5B+ epithelial	MUC4	40.0683	4.84288	0	0	0.730769	0.0770578
MUC5B+ epithelial	SIX1	38.394	6.00109	0	0	0.671849	0.0193774
MUC5B+ epithelial	MUC5AC	37.3575	8.52975	1.91223e-305	1.39651e-302	0.64239	0.00903904
MUC5B+ epithelial	RUNX3	36.7997	5.9418	1.8659e-296	1.24912e-293	0.644845	0.0252528
MUC5B+ epithelial	TNC	36.468	4.52714	3.56788e-291	2.14965e-288	0.675941	0.0823682
MUC5B+ epithelial	GALNT6	36.2762	4.40121	3.83569e-288	2.20096e-285	0.672668	0.101407
MUC5B+ epithelial	IGFBP3	36.1628	3.84167	2.34023e-286	1.28181e-283	0.712766	0.138919
MUC5B+ epithelial	STRA6	35.5414	4.8944	1.12877e-276	5.78797e-274	0.644026	0.0632168
MUC5B+ epithelial	PLEKHS1	34.3377	3.43453	2.14597e-258	9.7581e-256	0.681669	0.116265
MUC5B+ epithelial	RCAN1	34.1372	4.01362	2.073e-255	9.0835e-253	0.675123	0.16468
MUC5B+ epithelial	FCGBP	33.6793	5.14037	1.16105e-248	4.82438e-246	0.645663	0.141461
MUC5B+ epithelial	PLAC8	32.4462	4.3174	6.12041e-231	2.37906e-228	0.60311	0.0638382
MUC5B+ epithelial	ESPN	31.7712	3.20252	1.61807e-221	5.82023e-219	0.643208	0.147506
MUC5B+ epithelial	PTGS2	31.6693	5.54787	4.11143e-220	1.45714e-217	0.580196	0.0687532
MUC5B+ epithelial	MESP1	31.6379	4.84198	1.11215e-219	3.88446e-217	0.572013	0.0463251
MUC5B+ epithelial	CILP	31.4757	4.17316	1.86982e-217	6.25871e-215	0.609656	0.101011
MUC5B+ epithelial	ANPEP	31.4719	6.20723	2.10392e-217	6.94581e-215	0.5491	0.0157618
MUC5B+ epithelial	CD8B	31.274	6.63365	1.05323e-214	3.43012e-212	0.541735	0.00926501
MUC5B+ epithelial	S100A9	30.9959	4.48119	6.123e-211	1.96753e-208	0.60311	0.114061
MUC5B+ epithelial	IRAK3	30.9787	4.5734	1.04364e-210	3.30944e-208	0.56383	0.0450822
MUC5B+ epithelial	CHST6	30.8047	3.03071	2.26402e-208	6.90668e-206	0.640753	0.155697
MUC5B+ epithelial	TNFRSF18	30.6489	6.241	2.73166e-206	8.12753e-204	0.536007	0.0195469
MUC5B+ epithelial	PROM2	29.9422	3.04808	5.56367e-197	1.55912e-194	0.61293	0.139371
MUC5B+ epithelial	REPS2	29.3839	2.84052	8.82189e-190	2.36231e-187	0.635025	0.198407
MUC5B+ epithelial	FAM20A	28.1234	2.72111	5.07084e-174	1.10097e-171	0.60802	0.167618
MUC5B+ epithelial	VSTM2L	27.6552	6.31889	2.4185e-168	4.85715e-166	0.48036	0.00864358
MUC5B+ epithelial	FUT2	27.3418	2.91088	1.35096e-164	2.64701e-162	0.572013	0.140444
MUC5B+ epithelial	C16orf45	27.1409	4.0381	3.24272e-162	6.0581e-160	0.505728	0.0517485
MUC5B+ epithelial	SLC1A5	26.576	2.72758	1.28453e-155	2.14981e-153	0.577741	0.147054
MUC5B+ epithelial	ERN2	26.4265	5.29549	6.79137e-154	1.11341e-151	0.468903	0.0230495
MUC5B+ epithelial	PRRX2	26.3837	4.9497	2.10747e-153	3.40872e-151	0.477087	0.037964
MUC5B+ epithelial	CLIC5	26.3725	2.51689	2.83705e-153	4.5582e-151	0.599018	0.188916
MUC5B+ epithelial	FHL2	26.2399	2.31892	9.32986e-152	1.47927e-149	0.60311	0.169934
MUC5B+ epithelial	GLYATL2	26.1257	5.24754	1.86249e-150	2.93372e-148	0.463175	0.0205638
MUC5B+ epithelial	RGCC	26.1014	2.82324	3.51749e-150	5.50465e-148	0.581015	0.163211
MUC5B+ epithelial	SPTBN2	25.8491	3.17737	2.49059e-147	3.84764e-145	0.518822	0.0981865
MUC5B+ epithelial	SLC5A8	25.8314	9.81506	3.94255e-147	6.01363e-145	0.441899	0.000960398
MUC5B+ epithelial	CLIC6	25.7778	3.14088	1.57396e-146	2.37077e-144	0.518822	0.0875092
MUC5B+ epithelial	PTGER2	25.5901	2.50826	1.96445e-144	2.90449e-142	0.577741	0.169086
MUC5B+ epithelial	TCN1	25.5242	3.83019	1.06206e-143	1.56071e-141	0.500818	0.0742331
MUC5B+ epithelial	LINC00284	25.189	2.81794	5.28145e-140	7.57636e-138	0.537643	0.132252
MUC5B+ epithelial	PECAM1	25.0323	4.40655	2.72302e-138	3.81539e-136	0.458265	0.0370036
MUC5B+ epithelial	RRAGD	24.8876	3.52994	1.01352e-136	1.37224e-134	0.481178	0.0663804
MUC5B+ epithelial	SLC4A11	24.221	3.6385	1.33782e-129	1.65341e-127	0.466448	0.0640077
MUC5B+ epithelial	ALPP	24.1864	4.93989	3.09138e-129	3.80113e-127	0.446809	0.0448562
MUC5B+ epithelial	CAVIN3	24.068	2.27313	5.41125e-128	6.52056e-126	0.559738	0.168974
MUC5B+ epithelial	EFHD1	23.8899	5.65876	3.90058e-126	4.63074e-124	0.420622	0.0155923
MUC5B+ epithelial	C6orf15	23.8768	8.33946	5.33603e-126	6.2735e-124	0.409165	0.00141235
MUC5B+ epithelial	TGFBR3	23.2178	2.83281	3.01147e-119	3.31399e-117	0.494272	0.119598
MUC5B+ epithelial	CXCL1	23.0259	4.62464	2.56327e-117	2.75781e-115	0.443535	0.0662674
MUC5B+ epithelial	MPV17L	22.5418	3.72855	1.61541e-112	1.66374e-110	0.432079	0.056607
MUC5B+ epithelial	CXCL17	22.157	2.93695	8.92788e-109	8.67588e-107	0.463993	0.100898
MUC5B+ epithelial	SCGB3A1	22.1261	5.10251	1.77389e-108	1.7169e-106	0.425532	0.0662109
MUC5B+ epithelial	VMO1	22.0668	6.38816	6.58317e-108	6.34617e-106	0.385434	0.0109598
MUC5B+ epithelial	FOXC1	21.8706	3.63711	4.95107e-106	4.62484e-104	0.414894	0.0442913
MUC5B+ epithelial	CAMK1D	21.6081	2.93889	1.50866e-103	1.38246e-101	0.444354	0.0838371
MUC5B+ epithelial	EFNA5	21.5713	2.56402	3.34457e-103	3.04167e-101	0.456628	0.0882436
MUC5B+ epithelial	RAMP1	21.1687	2.26608	1.8567e-99	1.63308e-97	0.487725	0.136941
MUC5B+ epithelial	AC007681.1	21.0368	4.22393	3.02e-98	2.60868e-96	0.389525	0.0335574
MUC5B+ epithelial	ENTPD3	20.8993	2.85757	5.43307e-97	4.59428e-95	0.437807	0.0959833
MUC5B+ epithelial	RUNX2	20.8144	4.47401	3.20776e-96	2.66576e-94	0.376432	0.0225976
MUC5B+ epithelial	ADRB2	20.63	6.44298	1.47672e-94	1.17844e-92	0.358429	0.00728772
MUC5B+ epithelial	CYP4X1	20.5865	2.93624	3.62768e-94	2.88538e-92	0.432079	0.0961528
MUC5B+ epithelial	COL6A1	20.5318	1.68322	1.11956e-93	8.76022e-92	0.531915	0.188125
MUC5B+ epithelial	CAPN13	20.5047	4.11755	1.95369e-93	1.52375e-91	0.385434	0.0415231
MUC5B+ epithelial	SLC46A3	20.3893	3.17816	2.08119e-92	1.60759e-90	0.403437	0.0601661
MUC5B+ epithelial	SLC4A4	20.3573	3.59363	4.00121e-92	3.06124e-90	0.400982	0.0666629
MUC5B+ epithelial	ACSF2	20.3221	2.1507	8.20687e-92	6.21967e-90	0.483633	0.153325
MUC5B+ epithelial	KCNN4	19.9059	2.52343	3.61821e-88	2.60295e-86	0.43126	0.0971132
MUC5B+ epithelial	HLA-DQA1	19.6278	1.55953	8.95745e-86	6.22117e-84	0.53437	0.181628
MUC5B+ epithelial	SULT2B1	19.4698	2.73929	1.98202e-84	1.34554e-82	0.43126	0.118185
MUC5B+ epithelial	CDA	19.3843	3.08428	1.0479e-83	7.01509e-82	0.396072	0.0725948
MUC5B+ epithelial	ANXA6	19.2806	2.68757	7.81863e-83	5.14834e-81	0.4018	0.0762104
MUC5B+ epithelial	ACY3	18.9806	3.27083	2.46692e-80	1.55229e-78	0.38216	0.0677928
MUC5B+ epithelial	SDR16C5	18.6456	5.40949	1.37047e-77	8.09517e-76	0.328151	0.0102254
MUC5B+ epithelial	DTX4	18.6132	2.35499	2.51161e-77	1.47275e-75	0.428805	0.122818
MUC5B+ epithelial	CCDC69	18.5608	2.61682	6.67521e-77	3.87645e-75	0.387889	0.0696006
MUC5B+ epithelial	AOC1	18.3962	2.13674	1.40895e-75	8.02736e-74	0.420622	0.105531
MUC5B+ epithelial	KYNU	18.314	2.91842	6.40294e-75	3.61384e-73	0.388707	0.0901079
MUC5B+ epithelial	SAA4	18.3133	5.91592	6.48401e-75	3.65104e-73	0.319967	0.00819163
MUC5B+ epithelial	IL4R	18.2009	2.10467	5.07451e-74	2.79214e-72	0.429624	0.126321
MUC5B+ epithelial	HOTAIRM1	17.9642	2.58534	3.71555e-72	1.99876e-70	0.383797	0.0805039
MUC5B+ epithelial	FAM129A	17.9415	3.19213	5.5962e-72	3.00375e-70	0.358429	0.0560985
cilliated	TPPP3	52.326	9.73285	0	0	0.991837	0.0346096
cilliated	RSPH1	52.2795	7.91138	0	0	0.991837	0.1473
cilliated	C20orf85	52.2368	10.7336	0	0	0.989796	0.0288692
cilliated	FAM183A	52.1859	10.3982	0	0	0.988776	0.0161623
cilliated	LRRIQ1	52.1474	6.66505	0	0	0.990816	0.132587
cilliated	ZMYND10	52.0644	9.48075	0	0	0.986735	0.0196177
cilliated	C1orf194	51.9559	10.0083	0	0	0.984694	0.029538
cilliated	C5orf49	51.9306	7.58152	0	0	0.985714	0.0892827
cilliated	C11orf88	51.8998	10.5455	0	0	0.983673	0.0212896
cilliated	DNAAF1	51.8609	8.49011	0	0	0.983673	0.0414089
cilliated	CAPSL	51.8525	10.2148	0	0	0.982653	0.0163295
cilliated	PIFO	51.8442	8.1821	0	0	0.983673	0.0839882
cilliated	TEKT1	51.6967	10.1624	0	0	0.979592	0.00975311
cilliated	FAM81B	51.6695	9.7621	0	0	0.979592	0.010812
cilliated	CFAP126	51.6336	9.59385	0	0	0.978571	0.0157722
cilliated	ARMC3	51.6196	6.78181	0	0	0.981633	0.0872206
cilliated	ROPN1L	51.5774	10.0756	0	0	0.977551	0.0134872
cilliated	MNS1	51.4407	6.99007	0	0	0.978571	0.0693864
cilliated	MORN5	51.4242	10.2849	0	0	0.97449	0.00958591
cilliated	CFAP157	51.4221	7.90306	0	0	0.976531	0.0308756
cilliated	CFAP53	51.3715	6.87833	0	0	0.977551	0.0925152
cilliated	C9orf24	51.2813	10.267	0	0	0.972449	0.0258597
cilliated	ENKUR	51.238	9.20301	0	0	0.971429	0.0142117
cilliated	EFCAB1	51.2217	9.34638	0	0	0.971429	0.0112021
cilliated	CEP126	51.1946	6.91823	0	0	0.97551	0.061974
cilliated	DNAH11	51.113	6.87735	0	0	0.97449	0.0562894
cilliated	SNTN	51.0897	10.0815	0	0	0.968367	0.0134872
cilliated	DNAH12	51.0851	9.8773	0	0	0.968367	0.00791395
cilliated	PPIL6	51.0808	6.29338	0	0	0.97449	0.109402
cilliated	DRC1	51.0542	10.4411	0	0	0.967347	0.0059076
cilliated	CFAP52	51.0327	9.72863	0	0	0.967347	0.00769102
cilliated	DRC3	50.9944	5.88701	0	0	0.97449	0.137658
cilliated	DYNLRB2	50.9691	6.65091	0	0	0.971429	0.106504
cilliated	HYDIN	50.9319	6.73692	0	0	0.971429	0.06738
cilliated	CFAP43	50.8815	7.61634	0	0	0.967347	0.0424121
cilliated	C6orf118	50.8189	10.0733	0	0	0.963265	0.00496015
cilliated	CCDC113	50.7493	5.80736	0	0	0.972449	0.123446
cilliated	LRRC46	50.7477	8.316	0	0	0.963265	0.0267514
cilliated	TUBA4B	50.7261	10.7215	0	0	0.961224	0.00423564
cilliated	WDR78	50.6773	5.39479	0	0	0.973469	0.163072
cilliated	CFAP45	50.6536	8.57278	0	0	0.961224	0.0172212
cilliated	DYDC2	50.6512	8.7241	0	0	0.961224	0.0219584
cilliated	STK33	50.5626	5.17399	0	0	0.97449	0.187371
cilliated	ERICH3	50.5488	6.63536	0	0	0.967347	0.0646492
cilliated	C11orf97	50.5167	9.36402	0	0	0.958163	0.0178343
cilliated	CCDC78	50.3334	9.2222	0	0	0.955102	0.0153263
cilliated	RSPH4A	50.3212	9.62988	0	0	0.954082	0.00741236
cilliated	SPAG8	50.2662	7.96502	0	0	0.955102	0.0229616
cilliated	FAM92B	50.1781	10.6037	0	0	0.95102	0.00568467
cilliated	SPATA17	50.1779	5.95365	0	0	0.961224	0.0844898
cilliated	C21orf58	50.1552	6.05789	0	0	0.963265	0.0887811
cilliated	TNFAIP8L1	50.1495	6.31094	0	0	0.961224	0.0612495
cilliated	FHAD1	50.0535	6.96285	0	0	0.955102	0.0416876
cilliated	ZBBX	50.0044	10.0027	0	0	0.947959	0.00412417
cilliated	FAM166B	49.9463	9.62051	0	0	0.946939	0.00808115
cilliated	SPAG17	49.9458	7.35877	0	0	0.952041	0.0441398
cilliated	DNAH9	49.9386	7.66036	0	0	0.95	0.0282004
cilliated	SPEF1	49.9056	8.1845	0	0	0.947959	0.0164967
cilliated	AL357093.2	49.6482	9.77396	0	0	0.941837	0.00897286
cilliated	WDR38	49.5682	10.0371	0	0	0.939796	0.00546174
cilliated	FAM216B	49.5244	10.215	0	0	0.938776	0.00501588
cilliated	TTC25	49.4926	7.53357	0	0	0.941837	0.0255253
cilliated	CDHR4	49.4572	9.93428	0	0	0.937755	0.00507162
cilliated	PRR29	49.3986	8.71339	0	0	0.937755	0.0104219
cilliated	DNAH7	49.3524	6.06566	0	0	0.947959	0.0716714
cilliated	CFAP57	49.3312	7.65007	0	0	0.938776	0.0208438
cilliated	CFAP70	49.3149	5.40537	0	0	0.957143	0.115867
cilliated	BBOF1	49.2801	4.87729	0	0	0.958163	0.17433
cilliated	CFAP221	49.1717	5.41363	0	0	0.952041	0.102157
cilliated	CFAP300	49.1324	6.49272	0	0	0.940816	0.0709469
cilliated	CDHR3	49.1217	8.73836	0	0	0.932653	0.0118709
cilliated	CFAP73	49.0555	8.02356	0	0	0.932653	0.0182244
cilliated	EFCAB10	48.9931	9.17413	0	0	0.929592	0.00902859
cilliated	DTHD1	48.9903	10.4594	0	0	0.928571	0.00317673
cilliated	MAPK15	48.8651	6.72659	0	0	0.934694	0.0417433
cilliated	TMEM231	48.8055	5.07199	0	0	0.946939	0.15187
cilliated	C20orf96	48.8053	4.85635	0	0	0.94898	0.178454
cilliated	CASC1	48.8039	5.73813	0	0	0.940816	0.0801984
cilliated	FAM227A	48.7538	5.1328	0	0	0.94898	0.134258
cilliated	DNAH6	48.6517	6.00485	0	0	0.936735	0.0619183
cilliated	MAP3K19	48.6198	11.0638	0	0	0.921429	0.00167196
cilliated	PACRG	48.6086	6.39239	0	0	0.931633	0.0479296
cilliated	AC013470.2	48.515	8.0803	0	0	0.922449	0.0141559
cilliated	WDR63	48.4762	9.59748	0	0	0.919388	0.00562894
cilliated	CC2D2A	48.4537	4.68978	0	0	0.94898	0.19378
cilliated	RIIAD1	48.412	9.62937	0	0	0.918367	0.00674358
cilliated	CCDC65	48.359	7.97716	0	0	0.919388	0.0191718
cilliated	AC007906.2	48.2424	5.05425	0	0	0.957143	0.151424
cilliated	WDR66	48.2337	5.23478	0	0	0.938776	0.113638
cilliated	MS4A8	48.036	6.95899	0	0	0.931633	0.0944658
cilliated	FANK1	48.0051	4.95099	0	0	0.935714	0.134091
cilliated	CCDC153	47.989	5.99184	0	0	0.922449	0.0702781
cilliated	RIBC2	47.9685	6.64945	0	0	0.917347	0.0428022
cilliated	TEKT2	47.9124	6.78118	0	0	0.916327	0.0411302
cilliated	RIBC1	47.7188	6.78481	0	0	0.912245	0.0373962
cilliated	CCDC114	47.6392	8.0116	0	0	0.906122	0.0143231
cilliated	AL121899.1	47.6147	6.37438	0	0	0.914286	0.0540043
cilliated	MOK	47.5849	4.27756	0	0	0.944898	0.19417
cilliated	PPP1R42	47.5111	8.89332	0	0	0.902041	0.00741236
cilliated	AC013264.1	47.3804	8.86817	0	0	0.9	0.011648
cilliated	NEK5	47.3568	5.31858	0	0	0.922449	0.0930725
cilliated	CABCOCO1	47.319	6.15708	0	0	0.909184	0.0535585
cilliated	OSCP1	47.2129	4.41581	0	0	0.932653	0.199465
cilliated	AK7	47.2057	5.31063	0	0	0.917347	0.0975868
cilliated	SYNE1	47.1886	4.90523	0	0	0.936735	0.134147
cilliated	C1orf158	47.1493	10.3006	0	0	0.893878	0.00228501
cilliated	PCAT19	47.0738	6.70709	0	0	0.908163	0.069052
cilliated	LRRC10B	47.0188	9.70298	0	0	0.891837	0.0041799
cilliated	DNAH10	47.0047	8.63846	0	0	0.892857	0.00947445
cilliated	CFAP54	46.9669	6.62823	0	0	0.90102	0.0334392
cilliated	STOX1	46.91	5.48619	0	0	0.910204	0.0733991
cilliated	CCDC17	46.504	7.77273	0	0	0.885714	0.0193948
cilliated	CFAP46	46.4396	6.44978	0	0	0.890816	0.0406287
cilliated	CFAP77	46.4371	9.95343	0	0	0.880612	0.0027866
cilliated	LDLRAD1	46.2975	6.89844	0	0	0.887755	0.0377863
cilliated	DNAI1	46.2651	9.7052	0	0	0.877551	0.00323246
cilliated	MAATS1	46.2526	6.0936	0	0	0.891837	0.0450872
cilliated	FRMPD2	46.1495	8.77063	0	0	0.876531	0.00668784
cilliated	TMEM232	45.9444	6.25791	0	0	0.884694	0.0364488
cilliated	STMND1	45.94	8.37754	0	0	0.873469	0.00964164
cilliated	ANKRD66	45.9177	10.5764	0	0	0.870408	0.00234075
cilliated	ARMC4	45.9139	8.10568	0	0	0.873469	0.0100318
cilliated	AKAP14	45.9019	10.1098	0	0	0.870408	0.0043471
cilliated	CCDC33	45.8956	5.82635	0	0	0.888776	0.0579056
cilliated	TTLL10	45.7815	7.00321	0	0	0.87551	0.0262498
cilliated	STOML3	45.7779	11.7106	0	0	0.867347	0.00117037
cilliated	RFX2	45.7696	5.10953	0	0	0.896939	0.0830407
cilliated	LRRC6	45.6427	4.64315	0	0	0.902041	0.127961
cilliated	UBXN11	45.3781	4.01978	0	0	0.919388	0.186312
cilliated	CCDC74A	45.2051	4.67892	0	0	0.904082	0.129187
cilliated	IQCD	45.1798	5.8046	0	0	0.873469	0.0577384
cilliated	CCDC173	45.1721	7.65435	0	0	0.861224	0.0158836
cilliated	ANKUB1	45.0906	10.2245	0	0	0.855102	0.00345539
cilliated	PIH1D2	45.09	5.4707	0	0	0.87551	0.0692749
cilliated	C4orf47	45.0496	6.28583	0	0	0.867347	0.0308756
cilliated	TTC29	45.0454	10.1615	0	0	0.854082	0.00245221
cilliated	IQUB	44.9965	6.21086	0	0	0.867347	0.0323803
cilliated	NEK11	44.9781	3.89119	0	0	0.918367	0.186981
cilliated	LINC01765	44.9502	10.5741	0	0	0.852041	0.00200635
cilliated	DZIP3	44.9327	4.51219	0	0	0.897959	0.164019
cilliated	MDH1B	44.7413	6.259	0	0	0.860204	0.0354456
cilliated	NWD1	44.7277	5.70523	0	0	0.871429	0.0658753
cilliated	C1orf87	44.6813	9.36529	0	0	0.847959	0.00406844
cilliated	C7orf57	44.6412	9.48356	0	0	0.846939	0.00378978
cilliated	VWA3B	44.6322	7.60289	0	0	0.85102	0.0159951
cilliated	CCDC96	44.5758	6.7083	0	0	0.854082	0.0279775
cilliated	CWH43	44.5462	4.71703	0	0	0.886735	0.126066
cilliated	OMG	44.53	9.5051	0	0	0.845918	0.011648
cilliated	DNAJA4	44.5175	4.84049	0	0	0.880612	0.108622
cilliated	CFAP65	44.4732	6.58334	0	0	0.853061	0.0251909
cilliated	CLGN	44.1363	6.33157	0	0	0.85102	0.0394583
cilliated	DCDC1	44.0725	5.61152	0	0	0.857143	0.0470378
cilliated	CCDC40	44.0006	4.55604	0	0	0.878571	0.113638
cilliated	C2orf73	43.9947	7.93207	0	0	0.837755	0.00958591
cilliated	AK9	43.8887	4.20708	0	0	0.890816	0.150477
cilliated	DNAAF3	43.8301	6.2072	0	0	0.843878	0.041799
cilliated	KCNRG	43.753	7.21234	0	0	0.835714	0.0183916
glandular	SLC5A1	13.5537	1.5068	7.532e-42	3.08186e-40	0.307146	0.148578
glandular	ADGRF1	12.5762	1.72325	2.8539e-36	9.0618e-35	0.297952	0.165517
glandular	RGS6	8.99943	2.05019	2.26888e-19	2.72447e-18	0.169662	0.0607381
glandular	ZNF90	8.11293	1.10051	4.94141e-16	4.62837e-15	0.244881	0.153297
glandular	BMF	8.04902	1.01167	8.34627e-16	7.63359e-15	0.272043	0.189595
glandular	LAMP5	7.71948	1.27069	1.16806e-14	9.79817e-14	0.19557	0.102964
glandular	CENPJ	7.6565	0.934747	1.91073e-14	1.57485e-13	0.272461	0.191591
glandular	NRN1	6.90205	1.97574	5.1258e-12	3.46124e-11	0.121605	0.0347247
glandular	SERTAD4	6.80309	0.932189	1.02399e-11	6.75744e-11	0.244045	0.172353
glandular	ST3GAL4	6.75503	1.01838	1.42804e-11	9.31669e-11	0.230673	0.158742
glandular	ZNF93	6.54193	0.931077	6.07278e-11	3.75363e-10	0.246135	0.178766
glandular	HIST1H1E	5.96647	0.938435	2.42439e-09	1.29094e-08	0.238613	0.178705
glandular	ALDH3B2	5.96144	0.950186	2.50023e-09	1.32839e-08	0.208525	0.142408
glandular	ADM	5.95012	1.695	2.67946e-09	1.41861e-08	0.125366	0.0523291
glandular	DAPK2	5.42455	0.894356	5.81013e-08	2.6876e-07	0.222733	0.1683
glandular	CECR2	4.78344	0.706054	1.7232e-06	6.87115e-06	0.242374	0.196794
glandular	CDKN3	4.69825	1.97806	2.62395e-06	1.02558e-05	0.0977852	0.0401089
glandular	MKI67	4.64661	2.01619	3.37436e-06	1.30366e-05	0.0977852	0.0410768
glandular	MYBL2	4.47011	2.2692	7.81809e-06	2.89515e-05	0.0798161	0.0240774
glandular	BIRC5	4.43434	1.7428	9.23533e-06	3.39027e-05	0.0969494	0.0425287
glandular	MFSD4A	4.35884	0.850323	1.30754e-05	4.7131e-05	0.204764	0.164731
glandular	SPC24	4.30555	1.69198	1.6657e-05	5.93397e-05	0.0906812	0.0373261
glandular	FDCSP	4.27585	8.47222	1.9041e-05	6.73349e-05	0.054743	0.000786449
glandular	AVIL	4.23188	0.759811	2.31747e-05	8.11433e-05	0.218972	0.181307
glandular	PPP1R1B	4.17534	0.547157	2.97545e-05	0.000103029	0.211032	0.161948
glandular	HPGD	4.10996	0.844069	3.9573e-05	0.000134762	0.201003	0.158439
glandular	CEP55	3.96425	1.80715	7.36268e-05	0.000242803	0.0831592	0.0340593
glandular	TOP2A	3.96413	1.6778	7.36626e-05	0.000242888	0.0969494	0.0487598
glandular	PBK	3.94132	1.86758	8.10348e-05	0.00026578	0.0793982	0.0304295
glandular	S100P	3.89903	1.82539	9.65778e-05	0.000314106	0.0860844	0.0381125
glandular	SEMA3E	3.88556	0.944889	0.000102095	0.000330934	0.151275	0.107381
glandular	KCNMB2-AS1	3.87864	2.21334	0.000105043	0.000339756	0.0664438	0.0179068
glandular	SPC25	3.86041	2.32139	0.000113198	0.000364765	0.0668617	0.0185118
glandular	CDCA3	3.84385	1.84159	0.00012112	0.000389044	0.0781446	0.0303085
glandular	ETV4	3.83884	1.1436	0.000123615	0.00039658	0.115336	0.069268
glandular	LINC01612	3.75259	0.958984	0.000175014	0.000550344	0.142499	0.099758
glandular	GTSE1	3.65552	2.01157	0.000256664	0.000789282	0.0727121	0.0273442
glandular	NCAPG	3.65355	2.10793	0.000258642	0.000794959	0.0710405	0.0257108
glandular	BRCA2	3.63749	1.12678	0.000275308	0.000842958	0.10865	0.0647308
glandular	UBE2C	3.59768	1.83521	0.000321071	0.00097515	0.083995	0.0399879
glandular	DLGAP5	3.5958	1.78372	0.000323396	0.00098147	0.0785625	0.0341803
glandular	PPARG	3.55917	0.753646	0.00037203	0.00112186	0.157543	0.117483
glandular	HIST1H1B	3.51731	2.50554	0.000435937	0.00130284	0.0639365	0.0200847
glandular	MND1	3.51339	1.68261	0.000442423	0.00132075	0.0881738	0.045856
glandular	KRT81	3.46536	5.31177	0.00052952	0.00156659	0.0513999	0.00804598
glandular	CCNA2	3.39547	1.58475	0.000685119	0.00200017	0.0848308	0.0436177
glandular	HMMR	3.37362	1.84133	0.000741864	0.00215565	0.07313	0.031337
glandular	KIFC1	3.3332	1.7526	0.000858519	0.00247285	0.0718763	0.030611
glandular	RTKN2	3.29645	1.11012	0.000979147	0.00279756	0.126201	0.0887477
glandular	MELK	3.29007	1.70615	0.00100164	0.00285877	0.0710405	0.030248
glandular	KIF15	3.28411	1.8509	0.00102304	0.00291743	0.0643544	0.023291
glandular	RASGRF1	3.28002	0.798359	0.00103799	0.00295551	0.121187	0.0810647
glandular	NUSAP1	3.27185	1.65	0.00106847	0.00303658	0.0898454	0.0508167
glandular	NUF2	3.26882	1.5844	0.00107998	0.00306636	0.0710405	0.030248
glandular	ESCO2	3.26667	1.80441	0.00108819	0.0030886	0.0697869	0.0293406
glandular	AC026336.3	3.25916	1.19587	0.00111742	0.00316822	0.10071	0.061948
glandular	LINC00649	3.25193	1.22841	0.00114624	0.00324611	0.0827413	0.0427707
glandular	TPX2	3.24826	1.59568	0.00116112	0.00328554	0.0827413	0.0432547
glandular	CENPU	3.24603	1.31041	0.00117025	0.00331098	0.108232	0.0708409
glandular	KNL1	3.19667	1.6459	0.00139025	0.00389006	0.0727121	0.0331518
glandular	TROAP	3.19528	1.43837	0.00139695	0.00390745	0.0743836	0.0346038
glandular	CENPA	3.18126	2.14513	0.00146636	0.00408687	0.0572503	0.0173019
glandular	SLC15A1	3.18026	0.690498	0.00147142	0.00410051	0.151692	0.116697
glandular	HJURP	3.16844	2.08398	0.00153259	0.00426654	0.0589219	0.0192377
glandular	AZGP1	3.14073	0.751505	0.00168529	0.00466736	0.153364	0.116213
glandular	AURKB	3.12949	1.91101	0.00175107	0.00483788	0.0597576	0.0205687
glandular	ASF1B	3.12738	1.45961	0.00176371	0.00487113	0.0722942	0.0333938
glandular proliferative	FHL2	19.8373	2.83742	1.41822e-87	1.70896e-84	0.641651	0.185046
glandular proliferative	MMP2	18.1781	2.82199	7.69534e-74	5.61993e-71	0.577861	0.147852
glandular proliferative	LYPD1	17.2455	2.78802	1.21051e-66	6.946e-64	0.555347	0.160848
glandular proliferative	NRP2	16.4844	2.53379	4.74635e-61	2.15825e-58	0.572233	0.199674
glandular proliferative	MEX3A	14.9384	2.31813	1.85479e-50	5.25888e-48	0.515947	0.166721
glandular proliferative	THBS1	14.4558	3.50579	2.30379e-47	5.84436e-45	0.422139	0.0650897
glandular proliferative	MAP2	14.185	2.71744	1.1354e-45	2.70923e-43	0.448405	0.100489
glandular proliferative	MAP1B	13.2903	2.51116	2.63438e-40	4.70286e-38	0.45591	0.134747
glandular proliferative	MCUB	13.0437	1.97658	6.90188e-39	1.11853e-36	0.489681	0.178086
glandular proliferative	PDLIM7	12.8121	2.38498	1.4021e-37	2.18004e-35	0.442777	0.14062
glandular proliferative	RASGRP1	12.7902	2.1048	1.86043e-37	2.83774e-35	0.472795	0.178358
glandular proliferative	CASC15	12.4766	3.03577	1.00215e-35	1.40418e-33	0.371482	0.0587276
glandular proliferative	SEC14L2	12.1031	1.89811	1.01736e-33	1.28369e-31	0.459662	0.173029
glandular proliferative	SEMA3E	11.322	2.24084	1.02111e-29	1.09861e-27	0.386492	0.105003
glandular proliferative	PLEKHO1	11.3155	1.97511	1.09983e-29	1.17283e-27	0.418386	0.145786
glandular proliferative	FHL3	11.2678	2.30781	1.89204e-29	1.99992e-27	0.382739	0.10957
glandular proliferative	FSTL3	11.0407	2.18423	2.43153e-28	2.46218e-26	0.39212	0.127787
glandular proliferative	ELK3	10.1993	1.64293	1.99617e-24	1.56433e-22	0.424015	0.181566
glandular proliferative	OLFM2	10.1835	2.59587	2.35027e-24	1.82127e-22	0.324578	0.0726482
glandular proliferative	PDGFB	10.1512	2.49356	3.27202e-24	2.49544e-22	0.341463	0.092224
glandular proliferative	RIMS4	10.1422	2.6111	3.58788e-24	2.7277e-22	0.318949	0.0644916
glandular proliferative	NREP	10.0728	1.72745	7.28974e-24	5.43909e-22	0.401501	0.158184
glandular proliferative	ETV4	10.0029	2.50423	1.48016e-23	1.07123e-21	0.318949	0.0680261
glandular proliferative	KCNN4	9.9985	1.86816	1.54728e-23	1.11312e-21	0.362101	0.111637
glandular proliferative	DPYSL3	9.58989	2.01099	8.81762e-22	5.83804e-20	0.332083	0.0865688
glandular proliferative	EMP1	9.38685	1.53328	6.18237e-21	3.92092e-19	0.422139	0.197281
TP63+ KRT5+ epithelial	FHL2	26.3622	3.56577	3.71893e-153	4.48131e-149	0.793713	0.181438
TP63+ KRT5+ epithelial	KRT17	24.1898	5.20291	2.85211e-129	1.37471e-125	0.675835	0.0645161
TP63+ KRT5+ epithelial	FBXO2	18.2459	3.23195	2.23215e-74	1.4943e-71	0.557957	0.106169
TP63+ KRT5+ epithelial	TNC	17.9396	2.88306	5.78926e-72	3.67161e-69	0.569745	0.108287
TP63+ KRT5+ epithelial	CLDN1	17.3442	2.42946	2.18167e-67	1.19496e-64	0.611002	0.1942
TP63+ KRT5+ epithelial	INPP4B	16.8947	2.30233	4.92491e-64	2.2825e-61	0.603143	0.196752
TP63+ KRT5+ epithelial	KRT5	15.6693	4.1454	2.45425e-55	7.78255e-53	0.475442	0.0974259
TP63+ KRT5+ epithelial	AHNAK2	15.5771	2.19469	1.04177e-54	3.17806e-52	0.573674	0.199957
TP63+ KRT5+ epithelial	MYL9	15.1505	2.51	7.52276e-52	2.06021e-49	0.528487	0.15586
TP63+ KRT5+ epithelial	CAVIN1	15.1369	2.12173	9.24052e-52	2.4744e-49	0.540275	0.150266
TP63+ KRT5+ epithelial	PRSS23	14.8907	2.17939	3.7884e-50	9.41242e-48	0.53831	0.167318
TP63+ KRT5+ epithelial	IGFBP3	14.5773	2.81112	3.91645e-48	8.6593e-46	0.51277	0.166667
TP63+ KRT5+ epithelial	C1S	14.443	1.84936	2.7763e-47	5.86919e-45	0.554028	0.178451
TP63+ KRT5+ epithelial	PTN	14.273	2.23523	3.22617e-46	6.64536e-44	0.520629	0.175953
TP63+ KRT5+ epithelial	CD40	14.2453	2.91211	4.79592e-46	9.63181e-44	0.447937	0.0895514
TP63+ KRT5+ epithelial	CDH3	14.1135	3.02992	3.13715e-45	6.19716e-43	0.430255	0.0708157
TP63+ KRT5+ epithelial	FAM129A	13.4708	3.3275	2.32195e-41	3.91322e-39	0.408644	0.0664169
TP63+ KRT5+ epithelial	LTBP2	13.4372	3.58002	3.6595e-41	6.08234e-39	0.392927	0.0505051
TP63+ KRT5+ epithelial	SAA1	13.1309	1.86286	2.19081e-39	3.27941e-37	0.518664	0.181058
TP63+ KRT5+ epithelial	RIC3	12.8776	2.1305	6.0175e-38	8.53069e-36	0.469548	0.150049
TP63+ KRT5+ epithelial	PLEKHA4	12.7105	2.11717	5.17036e-37	7.07987e-35	0.451866	0.128326
TP63+ KRT5+ epithelial	TGFBI	12.6957	3.46163	6.25071e-37	8.51086e-35	0.375246	0.0502878
TP63+ KRT5+ epithelial	PDLIM7	12.4226	2.27721	1.97089e-35	2.49992e-33	0.440079	0.141088
TP63+ KRT5+ epithelial	ETS1	12.3917	2.27201	2.89659e-35	3.59834e-33	0.428291	0.117193
TP63+ KRT5+ epithelial	TUBB6	12.1105	2.36532	9.29017e-34	1.08686e-31	0.408644	0.100956
TP63+ KRT5+ epithelial	MXRA5	12.0982	2.71911	1.07974e-33	1.25709e-31	0.388998	0.0820028
TP63+ KRT5+ epithelial	RAB31	11.8894	1.85864	1.34446e-32	1.51409e-30	0.459725	0.161942
TP63+ KRT5+ epithelial	CAVIN3	11.8842	1.81728	1.43e-32	1.59551e-30	0.477407	0.18638
TP63+ KRT5+ epithelial	FXYD5	11.8591	2.2087	1.93013e-32	2.1048e-30	0.40275	0.0979146
TP63+ KRT5+ epithelial	IL4R	11.7436	2.00271	7.62147e-32	8.02085e-30	0.43222	0.137993
TP63+ KRT5+ epithelial	MIR99AHG	11.6011	2.29412	4.06735e-31	4.13599e-29	0.404715	0.113555
TP63+ KRT5+ epithelial	EMP1	11.5557	1.87778	6.91212e-31	6.94092e-29	0.471513	0.196209
TP63+ KRT5+ epithelial	MDFI	11.5404	3.29795	8.24992e-31	8.24992e-29	0.341847	0.0470837
TP63+ KRT5+ epithelial	FERMT1	11.4897	3.02734	1.48583e-30	1.46157e-28	0.359528	0.0716846
TP63+ KRT5+ epithelial	LTBP1	11.4083	2.45802	3.80266e-30	3.60804e-28	0.394892	0.114532
TP63+ KRT5+ epithelial	EMP3	11.1308	1.75109	8.88069e-29	7.75452e-27	0.434185	0.149669
TP63+ KRT5+ epithelial	TNS4	11.069	3.61339	1.77307e-28	1.53158e-26	0.3222	0.0396437
TP63+ KRT5+ epithelial	KCNN4	11.0443	2.06195	2.33587e-28	1.99626e-26	0.394892	0.111057
TP63+ KRT5+ epithelial	COL17A1	10.9742	3.54409	5.08576e-28	4.25579e-26	0.330059	0.0551754
TP63+ KRT5+ epithelial	SYNPO	10.9698	3.0659	5.33993e-28	4.45302e-26	0.333988	0.0535462
TP63+ KRT5+ epithelial	LINC01503	10.8188	2.46435	2.8037e-27	2.28274e-25	0.357564	0.0824373
TP63+ KRT5+ epithelial	FSTL3	10.8123	2.04193	3.00921e-27	2.44181e-25	0.396857	0.128
TP63+ KRT5+ epithelial	ELK3	10.7831	1.65154	4.1391e-27	3.30305e-25	0.449902	0.181167
TP63+ KRT5+ epithelial	LRP1	10.7507	1.69863	5.88397e-27	4.63411e-25	0.445972	0.18285
TP63+ KRT5+ epithelial	SNCG	10.6073	3.6765	2.7573e-26	2.0831e-24	0.310413	0.0387748
TP63+ KRT5+ epithelial	LPAR6	10.46	1.92766	1.31819e-25	9.74487e-24	0.408644	0.155371
TP63+ KRT5+ epithelial	SLIT2	10.4124	1.89275	2.17584e-25	1.57945e-23	0.412574	0.150701
TP63+ KRT5+ epithelial	TNFRSF21	10.3623	1.73333	3.67981e-25	2.64727e-23	0.40275	0.136852
TP63+ KRT5+ epithelial	AXL	10.3554	2.45277	3.95645e-25	2.83535e-23	0.343811	0.080265
TP63+ KRT5+ epithelial	SERPINF1	10.3282	3.30257	5.2517e-25	3.68997e-23	0.320236	0.0624525
TP63+ KRT5+ epithelial	PXDN	10.2394	2.38992	1.32109e-24	9.16802e-23	0.343811	0.0817856
TP63+ KRT5+ epithelial	FAT2	10.2111	3.41553	1.76817e-24	1.21751e-22	0.306483	0.0467036
TP63+ KRT5+ epithelial	CHL1	10.1923	1.66373	2.14549e-24	1.45242e-22	0.424361	0.166449
TP63+ KRT5+ epithelial	ARHGAP23	10.0459	2.36574	9.57497e-24	6.33947e-22	0.339882	0.0839579
lumenal 1	HLA-DQA1	39.8498	3.43075	0	0	0.607233	0.14651
lumenal 1	WNT7A	36.1964	2.27366	6.92813e-287	8.78778e-284	0.643398	0.198912
lumenal 1	SOSTDC1	31.1362	2.85374	7.80241e-213	5.53053e-210	0.497056	0.115684
lumenal 1	NPR1	27.8243	1.75853	2.205e-170	9.48938e-168	0.543314	0.199577
lumenal 1	HLA-DOA	26.1494	2.99633	1.00145e-150	3.1344e-148	0.39529	0.0711998
lumenal 1	CHL1	25.5219	2.16183	1.12708e-143	3.05198e-141	0.447855	0.133938
lumenal 1	PCDH10	23.8765	1.76517	5.37776e-126	1.09834e-123	0.465097	0.166818
lumenal 1	NOS1	22.937	1.65773	1.98719e-116	3.62812e-114	0.45963	0.176005
lumenal 1	TMCC3	22.3655	1.50396	8.53056e-111	1.43767e-108	0.471405	0.194137
lumenal 1	LIX1	21.1605	2.8935	2.20918e-99	3.20731e-97	0.316653	0.0490783
lumenal 1	CRABP2	20.3194	1.44308	8.65728e-92	1.11572e-89	0.420942	0.161076
lumenal 1	GLDC	19.6504	1.9907	5.73334e-86	6.74017e-84	0.344407	0.0971895
lumenal 1	LYPD6B	19.3492	2.126	2.06839e-83	2.34029e-81	0.333053	0.0918102
lumenal 1	LINC01315	19.3207	1.5513	3.59602e-83	4.01222e-81	0.390664	0.149048
lumenal 1	LEFTY1	19.0488	1.34975	6.71802e-81	7.16391e-79	0.428511	0.184587
lumenal 1	AVPR1A	18.5019	2.12023	1.99162e-76	1.97523e-74	0.319596	0.0887277
lumenal 1	PTN	18.1425	1.52451	1.47165e-73	1.36938e-71	0.381413	0.157026
lumenal 1	IFI44L	17.9327	1.3857	6.55219e-72	5.89209e-70	0.399916	0.178604
lumenal 2	TUNAR	39.0362	2.37258	0	0	0.656961	0.19944
lumenal 2	MT1G	37.7344	3.4521	0	0	0.588353	0.167824
lumenal 2	TNNC1	33.5402	2.71438	1.25062e-246	1.03931e-243	0.531711	0.134868
lumenal 2	MT1M	31.8574	2.82893	1.04129e-222	7.17e-220	0.507379	0.129873
lumenal 2	CRABP2	28.046	2.0629	4.46648e-173	1.58297e-170	0.487435	0.148879
lumenal 2	NOS1	26.2335	1.87237	1.10257e-151	3.28048e-149	0.48584	0.169773
lumenal 2	CLDN22	26.0773	4.12303	6.59271e-150	1.91427e-147	0.35341	0.0338085
lumenal 2	LEFTY1	26.036	1.94311	1.93881e-149	5.56254e-147	0.489828	0.173307
lumenal 2	SULT1E1	25.6056	3.72239	1.32212e-144	3.50143e-142	0.361388	0.0507432
lumenal 2	LOXL1	24.3768	1.94878	3.01397e-131	6.85251e-129	0.450339	0.168616
lumenal 2	SFTA2	24.3679	1.70343	3.74746e-131	8.44053e-129	0.481851	0.193287
lumenal 2	TMCC3	23.2242	1.44214	2.59083e-119	5.07634e-117	0.48225	0.190302
lumenal 2	CRISP3	23.0906	2.02732	5.76043e-118	1.1018e-115	0.464699	0.19347
lumenal 2	SLC30A2	22.9336	1.86538	2.14996e-116	4.04798e-114	0.425608	0.146625
lumenal 2	GLDC	22.4606	2.27056	1.00737e-111	1.79834e-109	0.366972	0.0918007
lumenal 2	MT1H	21.9108	3.79822	2.04904e-106	3.35931e-104	0.307539	0.0394128
lumenal 2	PCDH10	20.891	1.51655	6.47038e-97	9.22699e-95	0.428799	0.170017
lumenal 2	IL33	20.8003	1.75658	4.29877e-96	5.92001e-94	0.386119	0.128229
lumenal 2	GCNT4	20.7053	1.80325	3.10421e-95	4.17941e-93	0.37136	0.114583
lumenal 2	CDH16	20.508	2.10614	1.82708e-93	2.38014e-91	0.350618	0.100268
lumenal 2	NRCAM	20.1906	1.41854	1.18505e-90	1.47978e-88	0.420822	0.172454
lumenal 2	TESMIN	18.4975	1.23166	2.16342e-76	2.08554e-74	0.425209	0.19682
glandular early-secretory	CD36	48.1424	3.36502	0	0	0.652588	0.13592
glandular early-secretory	ADAMTS8	46.4934	3.0434	0	0	0.654176	0.168315
glandular early-secretory	STEAP4	40.8644	3.3367	0	0	0.55605	0.131672
glandular early-secretory	IHH	40.7661	2.59494	0	0	0.602096	0.166096
glandular early-secretory	MMP26	37.8163	2.82795	0	0	0.561448	0.162229
glandular early-secretory	GREM2	36.5978	3.51681	3.09978e-293	9.00056e-291	0.470308	0.0685939
glandular early-secretory	LRRC26	36.5442	3.69849	2.20126e-292	6.09773e-290	0.464592	0.0647268
glandular early-secretory	CTNNA2	36.0396	2.1337	2.00895e-284	5.26257e-282	0.577644	0.188918
glandular early-secretory	HPGD	35.6279	3.32928	5.17864e-278	1.30005e-275	0.48301	0.100101
glandular early-secretory	SRARP	34.6923	3.93966	1.03085e-263	2.23815e-261	0.430295	0.0426017
glandular early-secretory	HSD17B2	33.469	2.48658	1.36056e-245	2.64432e-243	0.510003	0.162419
glandular early-secretory	TRH	33.4087	2.35007	1.02488e-244	1.96029e-242	0.532868	0.161278
glandular early-secretory	SUFU	32.9533	2.59228	3.79783e-238	6.77983e-236	0.47793	0.136554
glandular early-secretory	HLA-DOB	32.89	3.53327	3.05191e-237	5.36868e-235	0.422356	0.0626347
glandular early-secretory	FAP	32.5884	3.17084	5.99673e-233	1.02497e-230	0.42712	0.0673894
glandular early-secretory	ADGRG2	32.4753	2.84871	2.37686e-231	3.97795e-229	0.449031	0.0956638
glandular early-secretory	ITGA1	32.1589	2.19837	6.64137e-227	1.04612e-224	0.514767	0.174464
glandular early-secretory	MUC15	31.2095	2.81108	7.92498e-214	1.15753e-211	0.462369	0.144542
glandular early-secretory	AC008637.1	30.9464	3.99222	2.84038e-210	4.02666e-208	0.382344	0.0378471
glandular early-secretory	PEBP4	30.4126	4.27716	3.74563e-203	5.043e-201	0.370276	0.0322683
glandular early-secretory	CAPN6	29.9171	2.45005	1.17974e-196	1.46556e-194	0.451889	0.127235
glandular early-secretory	CST1	29.4668	4.1982	7.66282e-191	9.00848e-189	0.365513	0.0370229
glandular early-secretory	LRP4	28.7412	3.85983	1.1677e-181	1.26196e-179	0.355351	0.0346139
glandular early-secretory	MTCL1	28.48	2.76589	2.07359e-178	2.16336e-176	0.391235	0.0762013
glandular early-secretory	HSD11B2	28.3471	1.93377	9.07826e-177	9.31004e-175	0.481423	0.186446
glandular early-secretory	RASSF4	27.8504	2.49132	1.06434e-170	1.01386e-168	0.410607	0.1124
glandular early-secretory	RFLNB	27.684	3.1013	1.0871e-168	1.01155e-166	0.368688	0.063649
glandular early-secretory	EFHC2	27.2942	2.01397	4.97699e-164	4.47558e-162	0.45697	0.169266
glandular early-secretory	EDN3	27.1014	1.98805	9.49109e-162	8.28751e-160	0.440775	0.146253
glandular early-secretory	KCNG1	26.9988	2.14076	1.52664e-160	1.31871e-158	0.430613	0.141879
glandular early-secretory	PART1	26.4252	2.19202	7.03346e-154	5.66911e-152	0.421404	0.145429
glandular early-secretory	KCNK13	25.5943	3.05307	1.76355e-144	1.30774e-142	0.334709	0.04761
mid-secretory	HABP2	40.3127	2.30558	0	0	0.575514	0.198032
mid-secretory	SCGB2A2	36.5169	2.89383	5.97764e-292	2.94002e-289	0.509784	0.164156
mid-secretory	CXCL14	34.9774	3.7802	4.9642e-268	2.06271e-265	0.440542	0.101091
mid-secretory	C2CD4A	34.095	2.62446	8.73702e-255	3.05162e-252	0.468138	0.138582
mid-secretory	CLEC4E	27.539	3.34285	5.99466e-167	1.26729e-164	0.342198	0.0702283
mid-secretory	CYP3A5	27.2169	2.08335	4.09876e-163	8.37119e-161	0.412694	0.151637
mid-secretory	ADGRF1	26.4844	1.91288	1.46524e-154	2.75876e-152	0.396638	0.125059
mid-secretory	SST	25.5212	3.3972	1.14746e-143	2.0039e-141	0.335173	0.0846221
mid-secretory	NAPSA	23.4139	3.36871	3.08508e-121	4.22445e-119	0.288008	0.0546294
mid-secretory	SLC15A1	22.4015	2.70726	3.80354e-111	4.65306e-109	0.297792	0.0739774
mid-secretory	ATOH8	21.8575	1.55708	6.59987e-106	7.26287e-104	0.396889	0.190132
mid-secretory	SLC1A1	20.6563	2.11125	8.56633e-95	7.82002e-93	0.33994	0.15157
mid-secretory	CYS1	20.4609	2.40044	4.80502e-93	4.30487e-91	0.275213	0.0689563
mid-secretory	DPP4	20.1679	2.0005	1.87335e-90	1.62988e-88	0.315354	0.118163
mid-secretory	ARSE	20.1647	2.59043	1.9984e-90	1.73243e-88	0.263171	0.060387
mid-secretory	INHBB	20.1462	1.4879	2.90869e-90	2.51252e-88	0.363522	0.167437
mid-secretory	SCIN	19.7143	1.53869	1.62486e-86	1.32295e-84	0.33442	0.136908
mesothelial	CPE	48.9597	7.5488	0	0	0.834913	0.057371
mesothelial	C1S	48.8183	5.286	0	0	0.85703	0.140624
mesothelial	CAVIN1	48.8011	5.21671	0	0	0.851501	0.111231
mesothelial	SPARC	46.1533	5.55442	0	0	0.811216	0.112137
mesothelial	PROCR	46.0561	7.97516	0	0	0.781201	0.025429
mesothelial	GAS1	46.0265	6.25785	0	0	0.800158	0.0681316
mesothelial	CCDC80	45.8841	7.55742	0	0	0.789889	0.0643937
mesothelial	EFEMP1	45.2546	5.50148	0	0	0.7891	0.073342
mesothelial	CALB2	44.9809	9.42825	0	0	0.759084	0.0066829
mesothelial	MGP	44.7155	5.6992	0	0	0.802528	0.139775
mesothelial	CLDN15	44.5351	5.23373	0	0	0.78752	0.13683
mesothelial	UPK3B	44.3054	8.11457	0	0	0.754344	0.0316022
mesothelial	COL6A2	43.5738	5.28496	0	0	0.771722	0.0962225
mesothelial	CLDN1	43.3032	4.67588	0	0	0.793839	0.163221
mesothelial	COL8A1	43.1661	8.32657	0	0	0.730648	0.0145551
mesothelial	GYPC	43.0097	5.50042	0	0	0.749605	0.0618452
mesothelial	COL6A1	42.8625	4.36351	0	0	0.78831	0.168885
mesothelial	MYL9	42.3891	4.33055	0	0	0.778831	0.121935
mesothelial	AC245041.2	41.8388	7.39345	0	0	0.709321	0.0105907
mesothelial	HEG1	41.4047	4.45068	0	0	0.751975	0.114629
mesothelial	TIMP2	41.2477	3.94788	0	0	0.766983	0.172
mesothelial	LAMA4	40.7197	5.30584	0	0	0.71643	0.0761738
mesothelial	COL3A1	40.5078	4.48559	0	0	0.756714	0.190916
mesothelial	PTGIS	40.4343	8.26907	0	0	0.683254	0.00696608
mesothelial	MEIS2	39.8518	5.91473	0	0	0.687204	0.02962
mesothelial	EMP3	39.7619	4.28807	0	0	0.726698	0.116498
mesothelial	PMP22	39.5678	5.56484	0	0	0.687204	0.0433256
mesothelial	ALDH1A2	39.0547	5.98553	0	0	0.672196	0.0305261
mesothelial	MST1	38.8355	4.68459	0	0	0.696682	0.0895962
mesothelial	ANXA8	38.8044	7.54676	0	0	0.657188	0.00770233
mesothelial	MEDAG	38.7364	8.74497	0	0	0.653239	0.00470069
mesothelial	FXYD1	38.3502	6.36703	0	0	0.656398	0.0205018
mesothelial	VSIR	38.2885	5.09684	0	0	0.673776	0.0584471
mesothelial	AEBP1	38.2446	5.00872	0	0	0.676145	0.0600328
mesothelial	IL18	37.7662	3.78834	0	0	0.718009	0.185535
mesothelial	CCND2	37.4262	5.00407	1.46307e-306	3.09298e-304	0.660348	0.044968
mesothelial	WT1	37.3179	6.59289	8.41958e-305	1.73429e-302	0.636651	0.013649
mesothelial	PDPN	37.3045	5.58831	1.38863e-304	2.83611e-302	0.646919	0.0333579
mesothelial	LRP1	36.9358	3.55179	1.23278e-298	2.47583e-296	0.708531	0.152744
mesothelial	DSC3	36.9271	7.00369	1.69814e-298	3.38225e-296	0.627172	0.00787223
mesothelial	MAF	36.9248	5.4478	1.84684e-298	3.64827e-296	0.64297	0.0377754
mesothelial	SULF1	36.7023	6.77932	6.70193e-295	1.28188e-292	0.627172	0.0164241
mesothelial	CPXM1	36.5773	5.48662	6.57691e-293	1.20995e-290	0.637441	0.0415699
mesothelial	AOX1	36.2041	5.86949	5.23976e-287	9.28516e-285	0.627172	0.0292802
mesothelial	SLIT3	36.1776	5.98923	1.37029e-286	2.41051e-284	0.624013	0.0286006
mesothelial	BNC1	36.0834	8.67736	4.13344e-285	7.11542e-283	0.608215	0.00305828
mesothelial	PTGER3	35.7702	7.90525	3.20867e-280	5.2965e-278	0.605055	0.0066829
mesothelial	DCN	35.7041	5.88373	3.40917e-279	5.55143e-277	0.635071	0.07691
mesothelial	GJA1	35.6095	3.51886	9.99249e-278	1.59483e-275	0.704581	0.192558
mesothelial	CRB2	35.2196	6.90937	1.00096e-271	1.54635e-269	0.599526	0.0106473
mesothelial	BCHE	35.1922	11.5531	2.63187e-271	4.01443e-269	0.591627	0.000736252
mesothelial	SLC16A1	35.1854	3.56105	3.34669e-271	5.07265e-269	0.678515	0.148326
mesothelial	NDN	35.1643	4.44562	7.02924e-271	1.05878e-268	0.629542	0.0533499
mesothelial	IGFBP6	35.148	5.13597	1.2477e-270	1.86767e-268	0.630332	0.0701705
mesothelial	TIMP3	35.1378	4.69834	1.78676e-270	2.65808e-268	0.630332	0.0618452
mesothelial	NR2F1	35.082	4.84929	1.2691e-269	1.8764e-267	0.635071	0.0969587
mesothelial	PLSCR4	34.9783	3.57259	4.80469e-268	7.06055e-266	0.665877	0.125559
mesothelial	TNXB	34.7941	6.60927	2.9848e-265	4.33336e-263	0.593997	0.0141587
mesothelial	TCEAL2	34.6291	7.06049	9.2087e-263	1.30547e-260	0.588468	0.00849521
mesothelial	PROS1	34.5589	4.64014	1.04639e-261	1.47473e-259	0.615324	0.0475732
mesothelial	HP	34.4853	5.67881	1.33126e-260	1.86531e-258	0.613744	0.0516509
mesothelial	FLRT2	34.1523	4.80625	1.23445e-255	1.70002e-253	0.609795	0.0509713
mesothelial	ABCA8	33.8307	7.71573	6.98309e-251	9.34958e-249	0.57267	0.00543694
mesothelial	EMB	33.7701	6.04363	5.42886e-250	7.22848e-248	0.581359	0.0202752
mesothelial	LSAMP	33.6211	8.10903	8.24161e-248	1.07364e-245	0.56793	0.00470069
mesothelial	PDLIM3	33.5021	4.5239	4.49733e-246	5.67464e-244	0.607425	0.061562
mesothelial	PRG4	33.2037	11.7091	9.50751e-242	1.16904e-239	0.558452	0.0013026
mesothelial	EPHB6	33.1691	3.25344	3.00461e-241	3.67569e-239	0.658768	0.162485
mesothelial	LINC01133	32.8637	3.98238	7.25354e-237	8.48593e-235	0.609795	0.0771932
mesothelial	KDR	32.8072	6.48695	4.6491e-236	5.3867e-234	0.561611	0.0157445
mesothelial	FHL1	32.7957	5.46892	6.77505e-236	7.81238e-234	0.5703	0.0287705
mesothelial	C2	32.7062	4.59617	1.27336e-234	1.46133e-232	0.586888	0.0572011
mesothelial	KLF2	32.3934	4.70887	3.40082e-230	3.81208e-228	0.591627	0.0739084
mesothelial	PRSS23	32.2155	3.43556	1.07075e-227	1.17831e-225	0.638231	0.144249
mesothelial	PDGFD	32.0818	4.59167	7.90201e-226	8.57831e-224	0.576619	0.0557286
mesothelial	LINC00842	32.0141	8.41156	6.94541e-225	7.47251e-223	0.539494	0.00158577
mesothelial	PTGDS	31.4005	5.93942	1.99202e-216	2.01713e-214	0.556082	0.0528402
mesothelial	ITLN1	31.3725	10.2724	4.79506e-216	4.77524e-214	0.528436	0.00209549
mesothelial	CAVIN3	31.3108	2.91658	3.32678e-215	3.28587e-213	0.64218	0.162089
mesothelial	PLA2G2A	30.9481	10.0334	2.69414e-210	2.56635e-208	0.521327	0.00226539
mesothelial	DSE	30.9345	3.69245	4.11125e-210	3.88553e-208	0.583728	0.0884069
mesothelial	BICC1	30.8851	3.17768	1.89506e-209	1.76336e-207	0.620063	0.141644
mesothelial	GATA6	30.8795	5.34062	2.2492e-209	2.08484e-207	0.537915	0.025429
mesothelial	RSPO1	30.8511	7.29154	5.41148e-209	4.97774e-207	0.522907	0.00566348
mesothelial	SVEP1	30.6993	7.70748	5.80771e-207	5.30173e-205	0.519747	0.00566348
mesothelial	ASPHD1	30.6744	3.62034	1.24886e-206	1.13576e-204	0.580569	0.0941836
mesothelial	GXYLT2	30.4229	3.63068	2.73474e-203	2.432e-201	0.579779	0.107549
mesothelial	HAND2-AS1	30.1886	5.75323	3.33874e-200	2.86347e-198	0.521327	0.0194824
mesothelial	SEMA5A	30.1069	2.83545	3.9359e-199	3.30506e-197	0.637441	0.193521
mesothelial	LGALS2	30.0944	7.76283	5.73313e-199	4.79751e-197	0.509479	0.00605992
mesothelial	GSDME	30.0101	5.22817	7.25321e-198	5.96595e-196	0.523697	0.0259954
mesothelial	ABI3BP	29.9133	4.42104	1.32207e-196	1.07279e-194	0.542654	0.0539163
mesothelial	CAVIN2	29.9098	5.55617	1.46532e-196	1.18107e-194	0.522907	0.0304129
mesothelial	RAMP1	29.4244	3.30407	2.6789e-190	2.08263e-188	0.585308	0.129071
mesothelial	SCG5	29.2372	5.94534	6.5251e-188	4.94512e-186	0.505529	0.0215778
mesothelial	CDON	29.0686	4.62717	8.95577e-186	6.68217e-184	0.522117	0.0498386
mesothelial	MGARP	29.0041	7.43391	5.84144e-185	4.31836e-183	0.491311	0.00515376
mesothelial	PODN	28.9687	6.49519	1.63111e-184	1.19847e-182	0.495261	0.0122331
mesothelial	MYRF	28.96	3.05127	2.10098e-184	1.53902e-182	0.590837	0.14776
mesothelial	BCO2	28.9556	3.91124	2.38385e-184	1.74093e-182	0.542654	0.0753809
mesothelial	FXYD5	28.9355	3.42178	4.26707e-184	3.10684e-182	0.548973	0.0743614
mesothelial	PTPN13	28.9263	2.96613	5.57881e-184	4.04968e-182	0.596367	0.153763
mesothelial	DDR2	28.7045	4.4159	3.35244e-181	2.39744e-179	0.517378	0.0457043
mesothelial	RERG	28.6852	3.01529	5.83301e-181	4.14677e-179	0.581359	0.117744
mesothelial	DPYSL3	28.6151	3.82047	4.35518e-180	3.078e-178	0.533175	0.0619584
mesothelial	PLEKHA4	28.3943	3.13091	2.3784e-177	1.66144e-175	0.563191	0.106473
mesothelial	FLRT3	28.1836	4.25491	9.29571e-175	6.36439e-173	0.514218	0.0515943
mesothelial	ALDH1A3	28.1768	4.87403	1.1242e-174	7.65345e-173	0.507109	0.0491023
mesothelial	MMP23B	28.0989	4.80925	1.01088e-173	6.8626e-172	0.50237	0.0477997
mesothelial	PLEKHH2	27.8341	2.63427	1.67774e-170	1.11695e-168	0.597156	0.165827
mesothelial	DPYD	27.7828	3.57172	7.0019e-170	4.61054e-168	0.524487	0.0744181
mesothelial	TUBB6	27.5027	3.50773	1.63085e-166	1.05371e-164	0.525276	0.0794019
mesothelial	EFNA5	27.4719	3.47192	3.7995e-166	2.44181e-164	0.527646	0.0822337
mesothelial	GLT8D2	27.3616	5.83327	7.85706e-165	4.98303e-163	0.470774	0.0134224
mesothelial	CARNS1	27.3503	6.2441	1.07167e-164	6.7788e-163	0.468404	0.011327
mesothelial	DES	27.2776	8.101	7.816e-164	4.91816e-162	0.460506	0.0027751
mesothelial	MSRB3	27.1799	5.62494	1.12288e-162	6.9746e-161	0.469194	0.0150648
mesothelial	BNC2	26.8542	3.32584	7.52707e-159	4.53506e-157	0.524487	0.0985445
mesothelial	WNT2B	26.7944	3.5001	3.75249e-158	2.24404e-156	0.526856	0.104661
mesothelial	TBC1D2B	26.7847	2.78873	4.87598e-158	2.90869e-156	0.563981	0.1656
mesothelial	AKAP12	26.7769	3.35296	6.0049e-158	3.56448e-156	0.525276	0.0923147
mesothelial	VTN	26.5912	10.7552	8.57441e-156	4.99138e-154	0.447077	0.000453078
mesothelial	CLIC3	26.5259	2.94397	4.86994e-155	2.80779e-153	0.565561	0.171377
mesothelial	BMP4	26.5233	5.71889	5.21951e-155	3.00215e-153	0.458926	0.0174435
mesothelial	THY1	26.5058	4.81243	8.31353e-155	4.77038e-153	0.475513	0.0386249
mesothelial	SLCO3A1	26.4936	2.59087	1.14722e-154	6.55167e-153	0.586888	0.187914
mesothelial	TAGLN	26.3657	3.39126	3.39422e-153	1.92926e-151	0.527646	0.110098
mesothelial	TGM1	26.3405	4.39184	6.59348e-153	3.73889e-151	0.478673	0.0494421
mesothelial	CDH11	26.2203	4.94945	1.56102e-151	8.78983e-150	0.461295	0.0256555
mesothelial	MEG3	26.1604	4.89078	7.49669e-151	4.18218e-149	0.466035	0.0361896
mesothelial	RASSF8	26.0916	2.79796	4.53565e-150	2.51286e-148	0.545024	0.140001
mesothelial	DOCK11	25.9899	5.11986	6.44476e-149	3.54609e-147	0.454976	0.0222008
mesothelial	KLF9	25.5297	2.5798	9.23158e-144	4.85767e-142	0.56872	0.197655
mesothelial	LRP2	25.3356	6.11947	1.29519e-141	6.71272e-140	0.434439	0.010081
mesothelial	PIEZO2	25.2451	9.31907	1.28315e-140	6.59359e-139	0.424961	0.00107606
mesothelial	OSR1	25.1528	8.03153	1.31662e-139	6.73684e-138	0.424961	0.00300164
mesothelial	ZFPM2	25.139	4.52406	1.86444e-139	9.49958e-138	0.450237	0.0351702

## Sheet: stromal
Supplementary Table 2. Markers genes expressed by each cell subpopulation
cluster	gene	score	logfc	pval	pval_fdr	in_group_fraction	out_group_fraction
VSMC	MCAM	83.09	5.96868	0	0	0.943334	0.11818
VSMC	MYH11	78.0675	5.51341	0	0	0.916148	0.186085
VSMC	BCAM	78.0673	5.02212	0	0	0.901081	0.187018
VSMC	TINAGL1	71.5539	4.82887	0	0	0.849984	0.0801619
VSMC	PLN	71.0347	6.83091	0	0	0.799541	0.0294965
VSMC	RERGL	70.1993	9.33768	0	0	0.781526	0.0240875
VSMC	CD9	67.5082	4.30053	0	0	0.816901	0.141178
VSMC	CRIP2	67.4541	4.03023	0	0	0.813626	0.196436
VSMC	CRIP1	66.3036	5.0764	0	0	0.776613	0.105806
VSMC	SORBS2	65.6388	6.02261	0	0	0.748772	0.0590707
VSMC	NTRK2	64.8413	5.19534	0	0	0.753357	0.0501985
VSMC	GUCY1A1	64.7439	3.91349	0	0	0.797249	0.141957
VSMC	FRZB	60.9883	4.22943	0	0	0.73698	0.100708
VSMC	JAG1	60.7123	3.84154	0	0	0.752702	0.139233
VSMC	ITIH5	60.6453	5.06325	0	0	0.706518	0.0591097
VSMC	RCAN2	60.5445	5.18548	0	0	0.700295	0.056697
VSMC	CCDC3	58.6089	4.9324	0	0	0.684245	0.0531948
VSMC	SNCG	57.7657	5.04044	0	0	0.68097	0.072924
VSMC	NET1	57.1471	4.49794	0	0	0.684245	0.125263
VSMC	RRAD	54.708	4.25007	0	0	0.662299	0.0705892
VSMC	EPAS1	52.9666	3.16793	0	0	0.696364	0.179975
VSMC	C2orf40	52.6145	3.73285	0	0	0.649525	0.0608997
VSMC	PDGFA	52.4928	4.45758	0	0	0.624632	0.0649078
VSMC	CDH6	51.6213	5.12663	0	0	0.595807	0.0300802
VSMC	MT1M	51.5761	4.4423	0	0	0.624304	0.0822632
VSMC	FILIP1	50.8287	4.95229	0	0	0.591549	0.0440501
VSMC	PHLDA2	50.5438	4.40361	0	0	0.608909	0.0892287
VSMC	SERPINI1	50.3968	4.90082	0	0	0.586964	0.0441279
VSMC	PTP4A3	50.3035	4.23851	0	0	0.606289	0.0826134
VSMC	GJA4	49.9302	5.13079	0	0	0.575827	0.0240097
VSMC	KLF2	48.6949	3.3043	0	0	0.677694	0.186863
VSMC	NDUFA4L2	48.384	5.06157	0	0	0.565673	0.0398864
VSMC	AOC3	47.4971	4.10991	0	0	0.572879	0.0588373
VSMC	GUCY1B1	46.9716	3.72636	0	0	0.580413	0.0814071
VSMC	ITGA7	46.9633	4.4005	0	0	0.555847	0.0387579
VSMC	FAM129A	46.0195	5.12768	0	0	0.531608	0.0303136
VSMC	ESAM	45.5099	4.70456	0	0	0.530953	0.0300412
VSMC	ARHGAP29	45.3719	2.87499	0	0	0.619718	0.15402
VSMC	KCNAB1	44.3878	5.40469	0	0	0.509663	0.0296132
VSMC	RGS5	43.9634	4.18869	0	0	0.54602	0.0718733
VSMC	COX4I2	43.7711	5.24113	0	0	0.502784	0.0208966
VSMC	SGCA	43.4744	5.99612	0	0	0.490992	0.0113628
VSMC	GPRC5C	43.4071	4.20722	0	0	0.521127	0.0608219
VSMC	TBX2-AS1	43.3971	3.41983	0	0	0.558795	0.13647
VSMC	SORT1	43.2466	4.6004	0	0	0.50868	0.0454899
VSMC	ACTG2	43.235	4.31441	0	0	0.513266	0.034672
VSMC	CCND1	42.5338	3.32204	0	0	0.554209	0.121877
VSMC	SEPT4	41.9677	3.9921	0	0	0.509335	0.0579423
VSMC	COBLL1	41.4677	3.22361	0	0	0.538159	0.107207
VSMC	LGI4	41.2813	3.05968	0	0	0.536521	0.0886839
VSMC	CLMN	41.09	2.90991	0	0	0.55814	0.161141
VSMC	NRGN	40.3496	4.98367	0	0	0.469374	0.034672
VSMC	RERG	39.8244	2.50024	0	0	0.571241	0.156588
VSMC	SYNM	39.7032	5.9564	0	0	0.449394	0.01397
VSMC	CASQ2	39.5507	7.91398	0	0	0.439568	0.00252938
VSMC	AKAP1	38.8273	3.39032	0	0	0.499509	0.107324
VSMC	MAP3K7CL	38.7819	5.37628	0	0	0.449066	0.031948
VSMC	FHL5	38.0057	4.43605	0	0	0.447101	0.0263055
VSMC	TOB1	37.3015	2.9848	1.55025e-304	1.01273e-302	0.516541	0.159974
VSMC	ITGA8	36.7579	3.07874	8.68879e-296	5.48194e-294	0.4887	0.107557
VSMC	PRPH	36.6855	7.90158	1.24271e-294	7.79946e-293	0.408123	0.00303526
VSMC	PDLIM5	36.6259	2.45572	1.10642e-293	6.88998e-292	0.536194	0.170753
VSMC	FRY	36.4851	3.07258	1.90966e-291	1.17095e-289	0.482476	0.105028
VSMC	RASL11A	36.3839	3.01083	7.6391e-290	4.63664e-288	0.475598	0.0799284
VSMC	TTLL7	36.3341	2.87347	4.68284e-289	2.82799e-287	0.497216	0.137209
VSMC	PDE3A	35.5755	3.61134	3.35487e-277	1.93348e-275	0.440878	0.0568527
VSMC	PDLIM3	35.2089	2.46166	1.46234e-271	8.17239e-270	0.498854	0.102848
VSMC	LINGO1	35.1187	3.23639	3.49027e-270	1.9281e-268	0.45398	0.0844424
VSMC	PDE1A	34.905	3.15121	6.24601e-267	3.38032e-265	0.450049	0.071095
VSMC	MYOM1	34.7437	5.3431	1.72444e-264	9.22846e-263	0.396987	0.0146704
VSMC	NPY1R	34.7063	4.38833	6.32849e-264	3.37168e-262	0.407796	0.0233092
VSMC	NEURL1B	34.6632	3.01482	2.82303e-263	1.49739e-261	0.456928	0.0872831
VSMC	PHLDB2	34.6307	2.52566	8.72173e-263	4.6058e-261	0.501146	0.159935
VSMC	SLC25A4	34.5772	3.02613	5.56279e-262	2.92473e-260	0.461513	0.108413
VSMC	MAPRE2	34.3573	2.66058	1.09514e-258	5.69547e-257	0.49001	0.166978
VSMC	RBPMS2	34.1354	4.03819	2.20289e-255	1.12132e-253	0.415984	0.0558409
VSMC	ATP1B2	33.9876	2.43262	3.39551e-253	1.71746e-251	0.500819	0.169624
VSMC	HRH2	33.9023	4.76896	6.16615e-252	3.09923e-250	0.393384	0.0195735
VSMC	HES1	33.8938	2.71817	8.2287e-252	4.11865e-250	0.472977	0.10888
VSMC	NTN4	33.2241	3.95964	4.82796e-242	2.33367e-240	0.40321	0.044089
VSMC	LGALSL	32.9516	3.46111	4.00965e-238	1.89983e-236	0.420242	0.0775158
VSMC	PGF	32.7331	3.15051	5.28495e-235	2.47474e-233	0.426138	0.073819
VSMC	HEY2	32.6509	4.41231	7.76891e-234	3.60968e-232	0.386178	0.0316756
VSMC	RASGRP2	32.6263	2.45574	1.74042e-233	8.0398e-232	0.473305	0.144214
VSMC	LDB3	31.2385	4.8441	3.20341e-214	1.39894e-212	0.361284	0.0171998
VSMC	FOXC2	31.1466	5.81699	5.63107e-213	2.43691e-211	0.351785	0.00743249
VSMC	NRIP2	30.9949	4.35191	6.31074e-211	2.70179e-209	0.369145	0.0347498
VSMC	FOXS1	30.9718	3.25104	1.29234e-210	5.52298e-209	0.399607	0.0678263
VSMC	NFASC	30.8956	3.84445	1.3699e-209	5.80272e-208	0.375041	0.0368122
VSMC	KCNE4	30.8578	2.73768	4.4038e-209	1.8621e-207	0.435637	0.115768
VSMC	SNTA1	30.854	2.78135	4.95436e-209	2.09121e-207	0.426793	0.117052
pericytes-MYH11	CDC42EP3	13.0704	2.2312	4.86118e-39	5.06725e-36	0.578171	0.197452
pericytes-MYH11	FBXL22	10.4929	2.69424	9.31647e-26	5.58406e-23	0.415929	0.0960862
pericytes-MYH11	PRUNE2	10.4543	3.43022	1.40002e-25	8.1867e-23	0.374631	0.0499437
pericytes-MYH11	LIMS2	9.94712	2.12346	2.59589e-23	1.22032e-20	0.430678	0.120125
pericytes-MYH11	MYOCD	9.89204	2.48005	4.50741e-23	2.03896e-20	0.40708	0.104604
pericytes-MYH11	CDH3	9.75815	2.57322	1.70234e-22	7.16028e-20	0.386431	0.0820428
pericytes-MYH11	LCP1	9.20921	1.78733	3.28538e-20	1.27044e-17	0.457227	0.191468
pericytes-MYH11	ULK4	8.74255	1.77367	2.27915e-18	7.69615e-16	0.436578	0.182247
pericytes-MYH11	FLNB	8.6162	2.07093	6.92126e-18	2.27311e-15	0.383481	0.124877
pericytes-MYH11	TES	8.51004	2.28897	1.73877e-17	5.44086e-15	0.377581	0.127939
pericytes-MYH11	SORBS1	8.23724	2.47641	1.76234e-16	4.85658e-14	0.345133	0.0945727
pericytes-MYH11	NRP2	8.16778	1.65241	3.1412e-16	8.1859e-14	0.40708	0.150148
pericytes-MYH11	TSPAN2	8.083	2.98162	6.31912e-16	1.59475e-13	0.300885	0.0466704
pericytes-MYH11	AC027288.3	8.03396	1.73874	9.43773e-16	2.33268e-13	0.421829	0.199775
pericytes-MYH11	SPOCD1	7.75208	3.68495	9.04023e-15	2.04471e-12	0.271386	0.0290722
pericytes-MYH11	CES1	7.45801	2.23047	8.78374e-14	1.76967e-11	0.348083	0.138603
pericytes-MYH11	ACTG2	7.30567	2.80629	2.75899e-13	5.29174e-11	0.303835	0.0828875
pericytes-MYH11	PODN	6.46627	1.1223	1.0045e-10	1.4866e-08	0.40118	0.196889
pericytes-MYH11	SNCA	6.34115	1.79318	2.2805e-10	3.19737e-08	0.303835	0.107736
pericytes-MYH11	PTGIS	6.2361	1.32053	4.48604e-10	5.94215e-08	0.336283	0.136632
pericytes-MYH11	SERTAD4-AS1	6.2285	2.41383	4.7093e-10	6.1697e-08	0.253687	0.0597987
pericytes-MYH11	RAP2C	6.07889	1.80857	1.21016e-09	1.45068e-07	0.315634	0.143953
pericytes-MYH11	DPYSL3	5.94789	1.25793	2.71629e-09	3.14604e-07	0.368732	0.185098
pericytes-MYH11	DMD	5.84385	1.72751	5.10073e-09	5.63549e-07	0.283186	0.100978
pericytes-MYH11	SERTM2	5.57873	3.86477	2.42286e-08	2.30509e-06	0.19174	0.0162255
pericytes-MYH11	ARL4D	5.56866	1.22028	2.56704e-08	2.41352e-06	0.339233	0.173941
pericytes-MYH11	HSD17B6	5.43825	3.21808	5.38072e-08	4.81354e-06	0.20059	0.0313952
pericytes-MYH11	TRAF5	5.38061	1.1792	7.42356e-08	6.51941e-06	0.345133	0.186541
pericytes-MYH11	CSDC2	5.32259	1.01646	1.02303e-07	8.57589e-06	0.356932	0.189849
pericytes-MYH11	VGLL3	5.21225	1.33899	1.86568e-07	1.49598e-05	0.309735	0.154019
pericytes-MYH11	TSPAN18	5.05766	1.79492	4.24424e-07	3.19986e-05	0.244838	0.0886245
pericytes-MYH11	OSGIN2	4.98516	1.67934	6.191e-07	4.51153e-05	0.253687	0.102034
pericytes-MYH11	PROK1	4.80353	2.84911	1.55889e-06	0.000103244	0.19174	0.0432916
pericytes-MYH11	KANK1	4.71142	1.23168	2.46002e-06	0.000154845	0.294985	0.155075
pericytes-MYH11	RAMP3	4.56939	1.25459	4.89153e-06	0.000288144	0.274336	0.133148
pericytes-MYH11	SEMA3C	4.53358	0.978661	5.79932e-06	0.000335033	0.283186	0.138216
pericytes-MYH11	PFKP	4.49411	1.61376	6.98626e-06	0.000395487	0.224189	0.0850345
pericytes-MYH11	TNC	4.47753	0.91491	7.55123e-06	0.000421025	0.324484	0.188266
pericytes-MYH11	AC012085.2	4.46448	2.70745	8.02643e-06	0.000445448	0.179941	0.042658
pericyte-CCL19	STEAP4	44.9181	5.98881	0	0	0.779621	0.106313
pericyte-CCL19	GGT5	42.7942	4.15582	0	0	0.781991	0.157395
pericyte-CCL19	C2orf40	42.6942	6.05752	0	0	0.751975	0.0944515
pericyte-CCL19	TINAGL1	40.885	3.77852	0	0	0.78831	0.133054
pericyte-CCL19	LGI4	38.4702	4.44692	0	0	0.696682	0.110424
pericyte-CCL19	TM4SF1	36.2974	5.84628	1.77677e-288	1.37413e-285	0.630332	0.0601055
pericyte-CCL19	ADGRF5	33.5858	4.83415	2.70382e-247	1.27106e-244	0.590047	0.0413316
pericyte-CCL19	SYTL2	31.8008	4.06821	6.31892e-222	2.36713e-219	0.586098	0.0939785
pericyte-CCL19	RERG	31.0347	2.88161	1.83465e-211	6.19517e-209	0.638231	0.180462
pericyte-CCL19	RASL11A	29.7832	3.53462	6.44809e-195	1.81874e-192	0.56872	0.101364
pericyte-CCL19	GUCY1A1	29.5364	2.65713	9.8067e-192	2.61239e-189	0.639021	0.19185
pericyte-CCL19	RRAD	28.3479	3.43112	8.87608e-177	2.06606e-174	0.560032	0.113771
pericyte-CCL19	JAG1	27.7686	2.55679	1.03809e-169	2.18318e-167	0.610585	0.185665
pericyte-CCL19	MCAM	26.6395	2.14783	2.3696e-156	4.27151e-154	0.639021	0.185847
pericyte-CCL19	S100A10	26.6013	2.60403	6.5656e-156	1.1747e-153	0.596367	0.194033
pericyte-CCL19	ANGPT2	25.7407	2.91216	4.09652e-146	6.68122e-144	0.534755	0.144151
pericyte-CCL19	SNCG	25.5869	2.83147	2.13174e-144	3.45328e-142	0.538705	0.11901
pericyte-CCL19	CFH	25.5237	2.60066	1.07715e-143	1.69899e-141	0.575039	0.179734
pericyte-CCL19	FAM13C	25.3181	3.68973	2.01702e-141	3.11987e-139	0.473144	0.0677097
pericyte-CCL19	NTRK2	24.617	2.82882	8.30408e-134	1.18506e-131	0.512638	0.107004
pericyte-CCL19	AOC3	24.5816	3.16336	1.98786e-133	2.80347e-131	0.488152	0.0961615
pericyte-CCL19	NEURL1B	24.5643	3.10208	3.04523e-133	4.26956e-131	0.491311	0.109733
pericyte-CCL19	GPX3	24.4393	3.19567	6.53837e-132	8.90667e-130	0.484202	0.101728
pericyte-CCL19	PDE1A	24.4233	3.13335	9.66686e-132	1.30939e-129	0.481833	0.0942696
pericyte-CCL19	ITGA7	24.3929	3.1828	2.03628e-131	2.74269e-129	0.475513	0.0760779
pericyte-CCL19	KRT18	24.059	3.32873	6.71805e-128	8.5673e-126	0.483412	0.120102
pericyte-CCL19	FHL5	23.742	3.53701	1.33017e-124	1.62708e-122	0.444708	0.0537748
pericyte-CCL19	CCL21	22.6942	7.2134	5.11666e-114	5.65308e-112	0.383096	0.00898672
pericyte-CCL19	CRIP1	22.3653	2.27926	8.56373e-111	9.24844e-109	0.517378	0.161361
pericyte-CCL19	CCL19	22.1955	7.4287	3.79857e-109	4.01192e-107	0.375987	0.010624
pericyte-CCL19	FABP4	22.1032	4.21659	2.94359e-108	3.08177e-106	0.406793	0.0500273
pericyte-CCL19	ARHGAP15	21.7646	4.89217	5.02431e-105	5.06125e-103	0.381517	0.0275059
pericyte-CCL19	CCDC102B	21.4797	3.13486	2.41092e-102	2.32136e-100	0.43207	0.100055
pericyte-CCL19	MT1M	21.4507	2.53126	4.49478e-102	4.29332e-100	0.469984	0.124613
pericyte-CCL19	CCDC3	21.1759	2.58304	1.5938e-99	1.45844e-97	0.451027	0.104966
pericyte-CCL19	CHRDL1	20.7606	4.076	9.84051e-96	8.51719e-94	0.376777	0.0378024
pericyte-CCL19	NPY1R	20.2641	3.49959	2.66946e-91	2.1695e-89	0.381517	0.0495179
pericyte-CCL19	ANGPT1	20.0363	2.98647	2.65742e-89	2.12372e-87	0.414692	0.109551
pericyte-CCL19	CAVIN2	19.9504	2.53982	1.48603e-88	1.17972e-86	0.438389	0.139713
pericyte-CCL19	CSGALNACT1	19.9073	4.37084	3.5184e-88	2.77479e-86	0.3594	0.0397671
pericyte-CCL19	HOPX	19.8198	2.22484	2.00865e-87	1.56865e-85	0.457346	0.144733
pericyte-CCL19	ADGRL3	19.2935	2.81673	6.0945e-83	4.46837e-81	0.418641	0.140149
pericyte-CCL19	ARHGAP29	19.2747	1.93669	8.7551e-83	6.3995e-81	0.485782	0.190468
pericyte-CCL19	ACTG2	18.7506	3.28047	1.91456e-78	1.33048e-76	0.373618	0.0722212
pericyte-CCL19	PRELP	18.6722	1.8678	8.3381e-78	5.64706e-76	0.481833	0.198508
pericyte-CCL19	PDLIM3	18.5741	2.2026	5.20613e-77	3.5061e-75	0.42891	0.131817
pericyte-CCL19	GUCY1B1	18.2172	2.29855	3.76852e-74	2.42877e-72	0.409953	0.121703
pericyte-CCL19	TCF21	18.0958	2.3936	3.43675e-73	2.15134e-71	0.401264	0.113335
pericyte-CCL19	PDGFA	18.0486	2.24426	8.09001e-73	4.99892e-71	0.405213	0.111406
pericyte-CCL19	CLSTN2	18.0388	2.85394	9.65783e-73	5.95235e-71	0.387836	0.123085
pericyte-CCL19	TNC	17.7944	2.3651	7.80825e-71	4.59958e-69	0.43207	0.178716
pericyte-CCL19	GPC3	16.9199	3.10039	3.20875e-64	1.71336e-62	0.334913	0.060251
pericyte-CCL19	LMCD1	16.9109	2.41558	3.74228e-64	1.9938e-62	0.401264	0.163908
pericyte-CCL19	SORBS2	16.7041	1.68965	1.22427e-62	6.43682e-61	0.409953	0.11952
pericyte-CCL19	ADRA2A	16.6462	2.59727	3.22378e-62	1.67658e-60	0.36019	0.0980535
pericyte-CCL19	LURAP1L	16.6046	2.99269	6.45051e-62	3.33299e-60	0.330964	0.0632709
pericyte-CCL19	LINC01197	16.5227	2.18295	2.52001e-61	1.29373e-59	0.403633	0.175623
pericyte-CCL19	ESAM	16.3124	2.63557	8.05648e-60	4.00735e-58	0.338073	0.0714935
pericyte-CCL19	SSTR2	16.3062	4.39295	8.92232e-60	4.42883e-58	0.293839	0.0286702
pericyte-CCL19	HMCN2	16.2178	5.55925	3.77737e-59	1.84821e-57	0.278831	0.011861
pericyte-CCL19	FAM162B	16.1725	1.98373	7.8868e-59	3.84321e-57	0.419431	0.195816
pericyte-CCL19	MT1F	16.1705	3.19534	8.14523e-59	3.96109e-57	0.322275	0.0676005
pericyte-CCL19	PLN	16.0759	1.81745	3.76232e-58	1.80765e-56	0.382306	0.0987812
pericyte-CCL19	KCNE4	15.9896	2.10853	1.50961e-57	7.19539e-56	0.385466	0.138876
pericyte-CCL19	INMT	15.9756	3.32993	1.89161e-57	8.9627e-56	0.305687	0.0452611
pericyte-CCL19	GEM	15.6314	1.86804	4.45141e-55	2.01744e-53	0.414692	0.182172
pericyte-CCL19	ITIH5	15.439	1.95698	8.95222e-54	3.96727e-52	0.372828	0.116573
pericyte-CCL19	CLEC3B	15.287	3.52407	9.34088e-53	4.03509e-51	0.296998	0.0552665
pericyte-CCL19	SUSD2	15.0219	3.79603	5.27791e-51	2.2122e-49	0.278041	0.033873
pericyte-CCL19	CSF1	14.765	2.86765	2.46305e-49	9.95813e-48	0.308057	0.0762962
pericyte-CCL19	RCAN2	14.6603	1.93702	1.15766e-48	4.61046e-47	0.35545	0.114426
pericyte-CCL19	GFRA1	14.6542	4.01567	1.26592e-48	5.03325e-47	0.265403	0.0250682
pericyte-CCL19	COBLL1	14.3823	1.90382	6.68362e-47	2.58451e-45	0.363349	0.143278
pericyte-CCL19	ARHGDIB	14.2205	2.24482	6.83198e-46	2.57948e-44	0.341232	0.129089
pericyte-CCL19	TRNP1	13.9968	2.43038	1.63132e-44	5.9986e-43	0.323855	0.117555
pericyte-CCL19	ATP1B2	13.9816	1.64693	2.01933e-44	7.40267e-43	0.395735	0.195998
pericyte-CCL19	WISP2	13.8262	2.37129	1.77196e-43	6.32184e-42	0.312006	0.0914681
pericyte-CCL19	SAMHD1	13.7675	1.92512	3.997e-43	1.41968e-41	0.362559	0.165727
pericyte-STEAP4	RGS5	31.5649	6.38332	1.11923e-218	2.68334e-214	0.95086	0.110323
pericyte-STEAP4	HIGD1B	26.5859	5.68509	9.88667e-156	7.9011e-152	0.798526	0.0427251
pericyte-STEAP4	GJC1	26.0216	4.0149	2.8207e-149	1.35252e-145	0.82801	0.172347
pericyte-STEAP4	NDUFA4L2	24.0213	4.72225	1.66714e-127	2.85497e-124	0.7543	0.0862616
pericyte-STEAP4	MCAM	21.0032	2.88621	6.13258e-98	4.74286e-95	0.798526	0.19729
pericyte-STEAP4	CCDC102B	20.5914	4.04482	3.27937e-94	2.31244e-91	0.660934	0.10683
pericyte-STEAP4	GGT5	20.2046	3.09986	8.92702e-91	5.78447e-88	0.707617	0.177392
pericyte-STEAP4	ANGPT2	20.0485	3.52101	2.07878e-89	1.27792e-86	0.678133	0.15393
pericyte-STEAP4	ARHGDIB	19.7967	3.75338	3.18038e-87	1.90624e-84	0.651106	0.131068
pericyte-STEAP4	ADGRF5	19.7068	4.16185	1.88638e-86	1.07681e-83	0.621622	0.0575078
pericyte-STEAP4	FAM13C	19.4436	3.88981	3.302e-84	1.75923e-81	0.624079	0.0778295
pericyte-STEAP4	FAM162B	19.2517	3.32667	1.365e-82	6.81791e-80	0.668305	0.199019
pericyte-STEAP4	GUCY1B1	18.7042	3.22373	4.57752e-78	2.1105e-75	0.638821	0.127152
pericyte-STEAP4	HOPX	18.6068	3.51991	2.82814e-77	1.25564e-74	0.641278	0.151566
pericyte-STEAP4	PTP4A3	18.532	3.2249	1.13959e-76	4.96759e-74	0.636364	0.131068
pericyte-STEAP4	JAG1	18.4025	2.73331	1.25327e-75	5.36554e-73	0.690418	0.197396
pericyte-STEAP4	TINAGL1	18.1125	2.73035	2.53996e-73	1.03213e-70	0.683047	0.154424
pericyte-STEAP4	GJA4	17.9262	3.81432	7.36253e-72	2.84704e-69	0.584767	0.0753951
pericyte-STEAP4	GEM	17.7303	2.9283	2.447e-70	8.88891e-68	0.648649	0.185859
pericyte-STEAP4	IMPA2	17.2861	3.1409	5.98943e-67	2.05138e-64	0.604423	0.180215
pericyte-STEAP4	STEAP4	17.1556	3.61114	5.70927e-66	1.92788e-63	0.589681	0.129445
pericyte-STEAP4	MIR4435-2HG	17.0044	2.97636	7.61813e-65	2.53673e-62	0.604423	0.172135
pericyte-STEAP4	COX4I2	16.8913	3.75012	5.21532e-64	1.68969e-61	0.547912	0.0652343
pericyte-STEAP4	FRZB	16.5557	2.55335	1.45754e-61	4.36807e-59	0.628993	0.161657
pericyte-STEAP4	LURAP1L	16.5549	3.77994	1.47631e-61	4.36969e-59	0.53317	0.0684801
pericyte-STEAP4	RERG	16.4179	2.43086	1.42527e-60	4.06797e-58	0.636364	0.194362
pericyte-STEAP4	SEPT4	15.9205	3.21294	4.56545e-57	1.17695e-54	0.542998	0.0995978
pericyte-STEAP4	NEURL1B	15.5004	3.00489	3.44869e-54	8.18638e-52	0.545455	0.120519
pericyte-STEAP4	LINGO1	15.4461	2.93668	8.01744e-54	1.86619e-51	0.542998	0.117662
pericyte-STEAP4	RASL11A	15.0864	2.85991	1.99117e-51	4.26236e-49	0.538084	0.115968
pericyte-STEAP4	AFAP1L2	15.0135	2.71218	5.99214e-51	1.24923e-48	0.545455	0.154177
pericyte-STEAP4	CYGB	14.9351	3.03008	1.94682e-50	3.98932e-48	0.528256	0.137666
pericyte-STEAP4	PDGFA	14.7685	2.63646	2.33828e-49	4.63309e-47	0.540541	0.118367
pericyte-STEAP4	PLXDC1	14.5949	2.65457	3.02812e-48	5.80794e-46	0.540541	0.146733
pericyte-STEAP4	PDE1A	14.5723	2.80729	4.21571e-48	8.02156e-46	0.518428	0.10549
pericyte-STEAP4	KCNE4	14.5211	2.67909	8.9029e-48	1.65463e-45	0.542998	0.144087
pericyte-STEAP4	LZTS1	14.4	4.45378	5.17594e-47	9.19208e-45	0.44226	0.0312235
pericyte-STEAP4	CDH6	13.9926	2.87815	1.73034e-44	2.74734e-42	0.488943	0.084427
pericyte-STEAP4	COL5A3	13.6451	2.47184	2.15857e-42	3.25483e-40	0.535627	0.197008
pericyte-STEAP4	B3GNT2	13.6295	2.52576	2.67353e-42	4.00612e-40	0.5086	0.139924
pericyte-STEAP4	FRMD3	13.5019	4.19089	1.52334e-41	2.21346e-39	0.420147	0.0324936
pericyte-STEAP4	AC100793.2	13.4913	2.70285	1.75917e-41	2.54074e-39	0.4914	0.128105
pericyte-STEAP4	FOXS1	13.4205	2.91931	4.58537e-41	6.46672e-39	0.471744	0.0977632
pericyte-STEAP4	LPL	13.3279	4.3102	1.59255e-40	2.20702e-38	0.415233	0.0370096
pericyte-STEAP4	TESC	13.2267	4.21381	6.15085e-40	8.37879e-38	0.412776	0.0354925
pericyte-STEAP4	ADRA2A	12.9509	2.88776	2.32313e-38	3.04355e-36	0.464373	0.104502
pericyte-STEAP4	PAG1	12.9091	2.58781	4.00134e-38	5.21371e-36	0.486486	0.140171
pericyte-STEAP4	ATP8B1	12.8209	3.08941	1.25159e-37	1.61328e-35	0.437346	0.0797347
pericyte-STEAP4	ITGA7	12.4451	2.64038	1.48662e-35	1.73018e-33	0.449631	0.0885549
pericyte-STEAP4	ESAM	12.1827	2.61782	3.84282e-34	4.26535e-32	0.434889	0.0781823
pericyte-STEAP4	SH2D3C	11.7799	3.63971	4.95725e-32	5.16739e-30	0.380835	0.0481583
pericyte-STEAP4	ARHGAP29	11.5358	1.87537	8.70698e-31	8.59053e-29	0.515971	0.198984
pericyte-STEAP4	COBLL1	11.4481	2.19866	2.40279e-30	2.29924e-28	0.461916	0.148532
pericyte-STEAP4	AGAP1	10.7261	1.88703	7.67369e-27	6.68211e-25	0.464373	0.187694
pericyte-STEAP4	HTR1F	10.7259	4.12376	7.69244e-27	6.68211e-25	0.331695	0.0222622
pericyte-STEAP4	LRRC32	10.5676	2.3023	4.21e-26	3.55404e-24	0.410319	0.118861
pericyte-STEAP4	CYTH3	10.5644	1.97549	4.35566e-26	3.6641e-24	0.452088	0.179579
pericyte-STEAP4	NOTCH1	10.5452	2.26029	5.344e-26	4.4487e-24	0.41769	0.134385
pericyte-STEAP4	HES1	10.5141	1.87373	7.43709e-26	6.14842e-24	0.447174	0.14324
pericyte-STEAP4	EGFLAM	10.4242	2.52403	1.92249e-25	1.56775e-23	0.398034	0.118438
pericyte-STEAP4	CPM	10.403	3.2031	2.40289e-25	1.94626e-23	0.353808	0.0581781
pericyte-STEAP4	TRPC6	10.3647	2.76985	3.58921e-25	2.85884e-23	0.36855	0.0793819
pericyte-STEAP4	EGFL6	10.0852	2.20849	6.42511e-24	4.66794e-22	0.437346	0.192492
pericyte-STEAP4	KHDRBS3	9.9492	1.9323	2.54215e-23	1.8032e-21	0.44226	0.187518
pericyte-STEAP4	APOLD1	9.9181	2.80168	3.47321e-23	2.4277e-21	0.363636	0.0882727
pericyte-STEAP4	HRC	9.87369	2.91619	5.41356e-23	3.74035e-21	0.336609	0.0524273
pericyte-STEAP4	RASGRP2	9.78039	1.80559	1.36679e-22	9.20471e-21	0.437346	0.175452
pericyte-STEAP4	ADCY6	9.68414	1.81585	3.52172e-22	2.31324e-20	0.437346	0.181873
pericyte-STEAP4	HEYL	9.67768	2.27981	3.75134e-22	2.45733e-20	0.380835	0.11812
pericyte-STEAP4	KIAA0040	9.41737	2.33303	4.62544e-21	2.89543e-19	0.363636	0.101609
pericyte-STEAP4	CHN1	9.30368	2.39158	1.35665e-20	8.25524e-19	0.371007	0.123906
pericyte-STEAP4	TTYH1	9.2151	3.63782	3.10988e-20	1.84553e-18	0.297297	0.0351397
pericyte-STEAP4	PGF	9.01387	2.07956	1.98913e-19	1.14363e-17	0.363636	0.107607
pericyte-STEAP4	ARHGAP18	8.67177	1.99053	4.25441e-18	2.29728e-16	0.358722	0.117944
pericyte-STEAP4	RBMS3	8.64612	1.56004	5.328e-18	2.8571e-16	0.422604	0.183778
pericyte-STEAP4	RCSD1	8.62623	2.53523	6.34064e-18	3.37066e-16	0.309582	0.0622354
pericyte-STEAP4	DAAM2	8.59596	1.79485	8.25746e-18	4.37026e-16	0.39312	0.166596
pericyte-STEAP4	LGI4	8.56306	2.06541	1.0991e-17	5.76609e-16	0.36855	0.132903
pericyte-STEAP4	MAPT	8.40153	3.80039	4.40687e-17	2.26242e-15	0.27027	0.0318939
pericyte-STEAP4	ADAP2	8.35022	3.32034	6.81343e-17	3.46085e-15	0.272727	0.0326701
pericyte-STEAP4	REM1	8.31943	1.8467	8.83877e-17	4.45188e-15	0.383292	0.168113
pericyte-STEAP4	TDO2	8.2427	3.63916	1.68367e-16	8.32288e-15	0.27027	0.0369743
pericyte-STEAP4	EPB41L1	8.23466	1.78909	1.80075e-16	8.88334e-15	0.383292	0.177533
pericyte-STEAP4	GMFG	8.12449	2.8399	4.49249e-16	2.16715e-14	0.285012	0.0553909
pericyte-STEAP4	RGS16	8.0511	2.22867	8.20542e-16	3.91882e-14	0.324324	0.0999153
eF6-TNC	MIR4435-2HG	13.5067	2.63531	1.42704e-41	1.71067e-38	0.684932	0.174366
eF6-TNC	COL5A3	12.1331	2.59924	7.05043e-34	5.28231e-31	0.630137	0.198514
eF6-TNC	GEM	11.9258	2.39111	8.6836e-33	5.47866e-30	0.643836	0.188946
eF6-TNC	TNC	11.8735	2.95448	1.62548e-32	9.99251e-30	0.60274	0.186703
eF6-TNC	PTPRE	11.0098	2.82683	3.42939e-28	1.67795e-25	0.538813	0.130976
eF6-TNC	GGT5	10.8464	1.87353	2.07424e-27	9.75095e-25	0.616438	0.181586
eF6-TNC	COL8A1	10.6302	2.59552	2.15709e-26	8.91657e-24	0.547945	0.150673
eF6-TNC	RGS4	10.0026	2.65927	1.48397e-23	4.87372e-21	0.520548	0.152075
eF6-TNC	INHBA	9.89964	2.25779	4.17774e-23	1.33548e-20	0.547945	0.172613
eF6-TNC	AFAP1L2	9.72796	2.38712	2.29134e-22	6.78207e-20	0.511416	0.157017
eF6-TNC	ASPN	9.67923	2.50097	3.69504e-22	1.05463e-19	0.506849	0.135742
eF6-TNC	RUNX1	9.54333	2.66957	1.38319e-21	3.81173e-19	0.474886	0.110998
eF6-TNC	TNFRSF12A	9.23444	2.4017	2.59641e-20	6.16327e-18	0.493151	0.146958
eF6-TNC	NOTCH1	9.19137	2.1705	3.87872e-20	8.85641e-18	0.488584	0.135707
eF6-TNC	SPHK1	9.0675	2.25775	1.2178e-19	2.58379e-17	0.474886	0.122985
eF6-TNC	UNC5B	8.9824	2.28896	2.64913e-19	5.38246e-17	0.47032	0.124772
eF6-TNC	MICAL2	8.73289	2.32737	2.48246e-18	4.61373e-16	0.465753	0.138792
eF6-TNC	DSP	8.45501	2.99685	2.79058e-17	4.37282e-15	0.410959	0.0929483
eF6-TNC	HOPX	8.28559	2.19975	1.17528e-16	1.67722e-14	0.47032	0.156105
eF6-TNC	SERPINE1	8.26051	2.07715	1.45053e-16	2.04567e-14	0.456621	0.140334
eF6-TNC	PLXDC1	8.2426	1.86095	1.68505e-16	2.36251e-14	0.474886	0.149832
eF6-TNC	ENC1	7.96192	2.0916	1.69394e-15	2.21924e-13	0.447489	0.146818
eF6-TNC	RELB	7.67991	1.77854	1.59202e-14	1.85285e-12	0.442922	0.142507
eF6-TNC	POSTN	7.57909	2.82689	3.47978e-14	3.89849e-12	0.392694	0.110122
eF6-TNC	ZNF469	7.49891	2.6687	6.43505e-14	6.88751e-12	0.356164	0.0639983
eF6-TNC	LAMP5	7.25808	2.16902	3.92636e-13	3.8266e-11	0.410959	0.137425
eF6-TNC	HES1	7.21554	1.40055	5.37201e-13	5.17245e-11	0.447489	0.14524
eF6-TNC	CYTH3	7.01661	1.48874	2.2732e-12	2.0412e-10	0.452055	0.181375
eF6-TNC	CYGB	6.98765	1.88719	2.79526e-12	2.48208e-10	0.406393	0.141175
eF6-TNC	PLOD2	6.96742	1.63873	3.22815e-12	2.83498e-10	0.452055	0.188771
eF1-cycling	TOP2A	23.7381	8.00855	1.45693e-124	5.82165e-121	0.803987	0.0322671
eF1-cycling	NUSAP1	23.6205	7.32793	2.37464e-123	7.1165e-120	0.800664	0.0321265
eF1-cycling	BIRC5	23.606	6.84122	3.34656e-123	8.91486e-120	0.800664	0.0256591
eF1-cycling	MKI67	23.5972	7.87178	4.11922e-123	9.87584e-120	0.797342	0.0222144
eF1-cycling	TPX2	23.5674	7.41183	8.33038e-123	1.81564e-119	0.797342	0.0227768
eF1-cycling	CENPF	23.424	7.16747	2.43526e-121	4.86545e-118	0.800664	0.0578207
eF1-cycling	PTTG1	23.3983	6.67172	4.45084e-121	8.20837e-118	0.800664	0.0484359
eF1-cycling	CDKN3	23.3885	7.05105	5.59471e-121	9.58094e-118	0.79402	0.028471
eF1-cycling	PBK	23.1947	7.18095	5.14916e-119	6.85839e-116	0.784053	0.0142707
eF1-cycling	ASPM	23.0774	7.65666	7.81793e-118	9.865e-115	0.780731	0.0191564
eF1-cycling	PCLAF	23.0731	5.66212	8.62887e-118	1.03439e-114	0.800664	0.0659754
eF1-cycling	CKS2	23.0325	4.92713	2.20227e-117	2.51425e-114	0.820598	0.166538
eF1-cycling	KNL1	22.8804	7.20948	7.27864e-116	6.98021e-113	0.774086	0.0159227
eF1-cycling	MAD2L1	22.8724	5.77476	8.74144e-116	8.06062e-113	0.787375	0.0584886
eF1-cycling	CENPE	22.7938	7.11559	5.27935e-115	4.68786e-112	0.774086	0.0260808
eF1-cycling	TYMS	22.7187	5.75615	2.92495e-114	2.41813e-111	0.787375	0.0661511
eF1-cycling	CCNB2	22.6716	6.53534	8.5371e-114	6.60248e-111	0.774086	0.029174
eF1-cycling	H2AFX	22.6347	4.38325	1.97352e-113	1.4786e-110	0.813953	0.184218
eF1-cycling	UBE2C	22.5941	7.72915	4.95683e-113	3.4953e-110	0.76412	0.019754
eF1-cycling	GTSE1	22.591	7.14784	5.31293e-113	3.63936e-110	0.76412	0.017645
eF1-cycling	HMMR	22.5308	7.60447	2.07365e-112	1.34367e-109	0.760797	0.0118453
eF1-cycling	NDC80	22.5272	6.00249	2.24931e-112	1.41914e-109	0.770764	0.0375747
eF1-cycling	ANLN	22.5079	7.26607	3.47142e-112	2.13403e-109	0.760797	0.0160984
eF1-cycling	DLGAP5	22.3433	7.63241	1.40285e-110	8.20328e-108	0.754153	0.0106151
eF1-cycling	CEP55	22.3042	7.12085	3.36723e-110	1.87743e-107	0.754153	0.0123023
eF1-cycling	NCAPD2	22.2894	4.41495	4.68168e-110	2.55098e-107	0.79402	0.0983831
eF1-cycling	CKAP2	22.2397	4.95728	1.41949e-109	7.56273e-107	0.787375	0.120316
eF1-cycling	KIF11	22.2325	6.78319	1.66537e-109	8.67982e-107	0.754153	0.0239016
eF1-cycling	KIF23	22.1933	6.67464	3.98347e-109	2.03199e-106	0.754153	0.0230931
eF1-cycling	LMNB2	22.0958	4.08811	3.46938e-108	1.73288e-105	0.797342	0.115958
eF1-cycling	NUF2	22.0625	6.90473	7.24631e-108	3.54552e-105	0.747508	0.0150791
eF1-cycling	HMGB3	22.0444	4.02024	1.07998e-107	5.07696e-105	0.807309	0.182109
eF1-cycling	GGH	22.0263	4.18796	1.61092e-107	7.42727e-105	0.790698	0.109666
eF1-cycling	CDK1	21.9986	5.75227	2.96877e-107	1.31808e-104	0.76412	0.0692443
eF1-cycling	CDCA3	21.9868	7.11201	3.8518e-107	1.67904e-104	0.744186	0.0149033
eF1-cycling	LMNB1	21.9502	5.47459	8.61661e-107	3.68899e-104	0.757475	0.0506854
eF1-cycling	KIF20B	21.9027	4.63907	2.45036e-106	1.03065e-103	0.780731	0.107557
eF1-cycling	TACC3	21.8474	6.27149	8.22e-106	3.39783e-103	0.744186	0.0245343
eF1-cycling	UBE2T	21.7563	5.62267	6.02142e-105	2.44684e-102	0.750831	0.0570475
eF1-cycling	CENPU	21.7465	5.51742	7.44828e-105	2.97621e-102	0.750831	0.0311424
eF1-cycling	SGO2	21.7336	4.93042	9.87231e-105	3.88014e-102	0.767442	0.0871353
eF1-cycling	TK1	21.7076	5.75119	1.74037e-104	6.72991e-102	0.747508	0.0297012
eF1-cycling	DIAPH3	21.635	6.61657	8.41521e-104	3.20246e-101	0.734219	0.0158172
eF1-cycling	ECT2	21.6264	5.44039	1.01422e-103	3.79937e-101	0.747508	0.0430228
eF1-cycling	NCAPG	21.6068	7.10465	1.54906e-103	5.62707e-101	0.730897	0.0141301
eF1-cycling	MXD3	21.5303	5.85537	8.10059e-103	2.89868e-100	0.740864	0.0405624
eF1-cycling	FOXM1	21.4554	6.21143	4.06972e-102	1.43487e-99	0.730897	0.0168014
eF1-cycling	CCNA2	21.3904	6.15298	1.64193e-101	5.7051e-99	0.730897	0.0267838
eF1-cycling	KIFC1	21.3679	6.77859	2.65664e-101	9.099e-99	0.724252	0.014587
eF1-cycling	KIF20A	21.3586	7.47649	3.24551e-101	1.09593e-98	0.72093	0.00896309
eF1-cycling	CIT	21.3519	6.68052	3.74188e-101	1.24599e-98	0.724252	0.014587
eF1-cycling	ZWINT	21.3186	5.63379	7.62471e-101	2.50414e-98	0.734219	0.0366608
eF1-cycling	ENDOG	21.3175	3.62487	7.80827e-101	2.52977e-98	0.807309	0.163339
eF1-cycling	PIMREG	21.3112	7.02208	8.93716e-101	2.85691e-98	0.72093	0.0113533
eF1-cycling	ARHGAP11A	21.2841	6.45813	1.5947e-100	4.96532e-98	0.724252	0.0199649
eF1-cycling	DEPDC1	21.2543	7.35154	3.00918e-100	9.24936e-98	0.717608	0.0102636
eF1-cycling	PRC1	21.2101	6.1098	7.71184e-100	2.3404e-97	0.724252	0.022355
eF1-cycling	CENPK	21.1475	5.37947	2.9118e-99	8.61858e-97	0.730897	0.0306854
eF1-cycling	SHCBP1	21.1095	6.38702	6.499e-99	1.87727e-96	0.717608	0.0138137
eF1-cycling	KIF15	21.085	6.83729	1.09207e-98	3.11695e-96	0.714286	0.0135325
eF1-cycling	CDC20	21.0527	7.09903	2.16061e-98	6.0942e-96	0.714286	0.0168014
eF1-cycling	RACGAP1	21.0459	5.86482	2.49573e-98	6.95756e-96	0.72093	0.0278032
eF1-cycling	SPC24	20.9966	5.69472	7.03788e-98	1.91742e-95	0.72093	0.0286116
eF1-cycling	SPC25	20.9419	7.17876	2.22403e-97	5.99115e-95	0.707641	0.00984183
eF1-cycling	KIF4A	20.9145	6.99512	3.95494e-97	1.05355e-94	0.707641	0.0113181
eF1-cycling	CENPM	20.8181	5.74312	2.9685e-96	7.73585e-94	0.714286	0.0243585
eF1-cycling	CCNB1	20.7779	6.0229	6.85514e-96	1.74843e-93	0.724252	0.0572935
eF1-cycling	BUB1B	20.7547	7.18614	1.11174e-95	2.80569e-93	0.700997	0.0103339
eF1-cycling	CKAP2L	20.7266	6.99173	1.99474e-95	4.98166e-93	0.700997	0.0113884
eF1-cycling	TTK	20.7177	7.04531	2.40034e-95	5.93279e-93	0.700997	0.0113181
eF1-cycling	RRM2	20.5157	6.39137	1.55883e-93	3.77506e-91	0.700997	0.0220035
eF1-cycling	KIF2C	20.5114	6.88367	1.70405e-93	4.08547e-91	0.694352	0.0114236
eF1-cycling	PHF19	20.4754	3.23384	3.56872e-93	8.38825e-91	0.79402	0.169631
eF1-cycling	CDCA2	20.1861	7.44216	1.29637e-90	2.87782e-88	0.681063	0.0085413
eF1-cycling	SGO1	20.1005	6.76125	7.30403e-90	1.5776e-87	0.681063	0.0118805
eF1-cycling	TMSB15A	20.0618	3.15062	1.59109e-89	3.40592e-87	0.790698	0.176942
eF1-cycling	KIF14	19.9988	6.88603	5.64613e-89	1.18742e-86	0.677741	0.0120211
eF1-cycling	EZH2	19.9471	4.17436	1.58971e-88	3.28563e-86	0.72093	0.0961687
eF1-cycling	RRM1	19.9422	3.32731	1.75032e-88	3.58665e-86	0.774086	0.187909
eF1-cycling	AURKB	19.9275	6.95079	2.35191e-88	4.77856e-86	0.674419	0.0118102
eF1-cycling	CENPA	19.9137	7.78777	3.09357e-88	6.23263e-86	0.671096	0.00783831
eF1-cycling	MELK	19.8736	6.53869	6.88982e-88	1.36515e-85	0.674419	0.0124077
eF1-cycling	C21orf58	19.6745	4.46635	3.56454e-86	6.89192e-84	0.704319	0.0700527
eF1-cycling	PARPBP	19.5519	4.2746	3.97281e-85	7.44126e-83	0.700997	0.06
eF1-cycling	SPAG5	19.426	6.21262	4.65395e-84	8.51744e-82	0.66113	0.0138137
eF1-cycling	TMEM106C	19.3839	3.08633	1.05574e-83	1.91753e-81	0.770764	0.181301
eF1-cycling	ITGA6	19.3635	3.37002	1.56739e-83	2.82543e-81	0.757475	0.184499
eF1-cycling	NSD2	19.2666	3.41171	1.02427e-82	1.8326e-80	0.737542	0.131248
eF1-cycling	KIF22	19.2276	3.12725	2.17256e-82	3.85831e-80	0.754153	0.173743
eF1-cycling	DHFR	19.1661	3.76625	7.10071e-82	1.25176e-79	0.717608	0.120527
eF1-cycling	RAD51AP1	19.1039	5.36916	2.34519e-81	4.04503e-79	0.66113	0.0275571
eF1-cycling	MND1	19.0972	5.47987	2.66532e-81	4.56436e-79	0.657807	0.0210193
eF1-cycling	CENPN	18.9942	4.85522	1.90544e-80	3.2171e-78	0.664452	0.03529
eF1-cycling	BUB1	18.9739	7.14155	2.80288e-80	4.69923e-78	0.641196	0.00934974
eF1-cycling	TROAP	18.9096	6.73291	9.50852e-80	1.56142e-77	0.641196	0.011529
eF1-cycling	CCDC18	18.8991	4.29537	1.16088e-79	1.88765e-77	0.677741	0.0549385
eF1-cycling	HJURP	18.8989	7.31261	1.16526e-79	1.88765e-77	0.637874	0.0086116
eF1-cycling	PSRC1	18.8855	4.97882	1.50044e-79	2.3982e-77	0.66113	0.0388401
eF1-cycling	FBXO5	18.8379	4.19441	3.69473e-79	5.8277e-77	0.681063	0.0908612
eF1-cycling	CDCA8	18.8297	6.804	4.31499e-79	6.76157e-77	0.637874	0.00977153
eF1-cycling	GAS2L3	18.7703	6.16466	1.32099e-78	2.04327e-76	0.641196	0.0178207
eF1-cycling	CIP2A	18.7618	4.70938	1.55145e-78	2.38436e-76	0.66113	0.0419684
eF1-cycling	NCAPG2	18.569	4.46151	5.72212e-77	8.62816e-75	0.66113	0.0480844
eF1-cycling	NEK2	18.5361	7.62582	1.05645e-76	1.56349e-74	0.624585	0.00572935
eF1-cycling	FANCI	18.5266	4.75381	1.25886e-76	1.84031e-74	0.651163	0.0390158
eF1-cycling	CENPH	18.4955	3.76214	2.24585e-76	3.26329e-74	0.684385	0.0780316
eF1-cycling	BRCA2	18.4894	4.39025	2.5138e-76	3.63062e-74	0.66113	0.0504394
eF1-cycling	EMC9	18.4874	2.82862	2.60692e-76	3.74257e-74	0.754153	0.168436
eF1-cycling	PHGDH	18.4801	2.90605	2.98559e-76	4.26068e-74	0.744186	0.166643
eF1-cycling	OLFM1	18.4029	2.88771	1.24591e-75	1.74683e-73	0.757475	0.18239
eF1-cycling	AURKA	18.3275	6.46227	4.98925e-75	6.83528e-73	0.624585	0.017188
eF1-cycling	DBF4	18.0935	3.36627	3.58265e-73	4.85277e-71	0.69103	0.108541
eF1-cycling	BARD1	18.0883	3.14103	3.93824e-73	5.30445e-71	0.714286	0.150299
eF1-cycling	PLK1	18.0635	6.55166	6.17859e-73	8.27552e-71	0.614618	0.0144464
eF1-cycling	SAC3D1	18.0015	2.92933	1.89709e-72	2.51286e-70	0.744186	0.191213
eF1-cycling	ESCO2	17.8803	6.10013	1.67903e-71	2.17594e-69	0.611296	0.0161687
eF1-cycling	APOLD1	17.8424	3.32354	3.30866e-71	4.24198e-69	0.684385	0.0859051
eF1-cycling	MYBL2	17.8217	6.02641	4.79642e-71	6.11671e-69	0.607973	0.0119859
eF1-cycling	KIF18B	17.7858	6.88987	9.10589e-71	1.1551e-68	0.601329	0.00727592
eF1-cycling	KNSTRN	17.768	4.34211	1.24996e-70	1.56608e-68	0.641196	0.0679086
eF1-cycling	CCDC34	17.677	3.12268	6.3015e-70	7.74762e-68	0.69103	0.117258
eF1-cycling	BRCA1	17.6112	3.79096	2.02152e-69	2.44777e-67	0.654485	0.0780316
eF1-cycling	NCAPD3	17.5107	3.33365	1.18721e-68	1.41609e-66	0.671096	0.0986643
eF1-cycling	ORC6	17.4517	4.20916	3.34098e-68	3.92648e-66	0.627907	0.049174
eF1-cycling	CDCA4	17.4109	3.42745	6.82347e-68	7.98014e-66	0.664452	0.108682
eF1-cycling	KRT17	17.3283	3.33794	2.87815e-67	3.33351e-65	0.671096	0.0959578
eF1-cycling	KIF18A	17.2316	6.51404	1.53811e-66	1.75601e-64	0.584718	0.00945518
eF1-cycling	SPDL1	17.1753	3.53275	4.06627e-66	4.55556e-64	0.647841	0.0864323
eF1-cycling	SKA1	17.1519	5.98732	6.08221e-66	6.78237e-64	0.584718	0.0114236
eF1-cycling	CCNF	17.0615	5.05328	2.8703e-65	3.14226e-63	0.594684	0.028225
eF1-cycling	PRR11	16.9821	5.20279	1.11453e-64	1.20909e-62	0.58804	0.0221441
eF1-cycling	RTKN2	16.9215	4.54668	3.12486e-64	3.37471e-62	0.598007	0.0328647
eF1-cycling	MIS18A	16.9171	2.62629	3.36514e-64	3.6179e-62	0.707641	0.148612
eF1-cycling	SKA3	16.9018	5.72922	4.36288e-64	4.64889e-62	0.578073	0.0134974
eF1-cycling	CDCA5	16.8943	5.77617	4.95614e-64	5.25767e-62	0.578073	0.0138489
eF1-cycling	TRIP13	16.8826	4.73991	6.04561e-64	6.38518e-62	0.591362	0.0266784
eF1-cycling	FAM83D	16.8682	7.76006	7.7077e-64	8.10491e-62	0.568106	0.00488576
eF1-cycling	ATAD2	16.6794	3.84198	1.85142e-62	1.90505e-60	0.631229	0.106749
eF1-cycling	CDC25B	16.6561	2.793	2.73237e-62	2.79951e-60	0.687708	0.155606
eF1-cycling	ARHGEF39	16.5553	5.63552	1.46722e-61	1.47183e-59	0.568106	0.0159578
eF1-cycling	CENPL	16.4437	3.56432	9.30807e-61	9.22153e-59	0.611296	0.0622144
eF1-cycling	MPHOSPH9	16.3983	2.46079	1.96581e-60	1.92369e-58	0.710963	0.198559
eF1-cycling	ZWILCH	16.3138	3.11392	7.87016e-60	7.54749e-58	0.631229	0.0823199
eF2	VWC2	21.7293	1.58469	1.08456e-104	1.40553e-102	0.300322	0.127102
eF2	AC011503.1	19.9403	1.07666	1.81885e-88	1.93808e-86	0.350081	0.189965
eF2	EDN3	18.8541	1.27705	2.71929e-79	2.5075e-77	0.286312	0.132825
eF2	MMP16	18.4267	1.16873	8.02397e-76	7.04669e-74	0.314654	0.170889
eF2	AC141928.1	17.4025	1.07807	7.89405e-68	6.04664e-66	0.319485	0.185529
eF2	MCOLN3	17.2423	1.05767	1.2781e-66	9.4868e-65	0.312882	0.174926
eF2	SLC2A11	17.1798	1.20749	3.76402e-66	2.73462e-64	0.305797	0.172486
eF2	ADAM12	16.857	0.982981	9.32514e-64	6.46156e-62	0.318196	0.181713
eF2	NDNF	16.665	1.36468	2.35547e-62	1.59077e-60	0.250403	0.116144
eF2	KIAA1210	15.8911	1.11528	7.30308e-57	4.36637e-55	0.283414	0.157225
eF2	NRG2	15.0938	1.08519	1.77918e-51	9.43715e-50	0.255878	0.132647
eF2	HSD11B2	14.9855	1.0107	9.13185e-51	4.74916e-49	0.266184	0.14427
eF2	KIF26B	14.8876	1.03039	3.96876e-50	2.03749e-48	0.278422	0.16135
eF3	VWC2	20.1093	1.64087	6.12331e-90	1.51347e-87	0.391709	0.144162
eF3	ITGA6	17.8036	1.35579	6.62765e-71	1.11117e-68	0.391709	0.172471
eF3	RASSF2	17.7777	1.29769	1.05175e-70	1.75109e-68	0.403553	0.187365
eF3	HSD11B2	17.4279	1.44161	5.06691e-68	7.99206e-66	0.365905	0.153106
eF3	EDN3	17.3781	1.36464	1.20943e-67	1.88286e-65	0.366751	0.14799
eF3	KLK4	17.2713	1.70515	7.74289e-67	1.17491e-64	0.326988	0.113541
eF3	OLFM1	17.153	1.44319	5.97414e-66	8.78712e-64	0.376481	0.171562
eF3	NRG2	17.0439	1.39143	3.88101e-65	5.57168e-63	0.354907	0.141736
eF3	KIAA1210	16.8248	1.20278	1.60534e-63	2.21196e-61	0.379442	0.167014
eF3	CILP	16.5952	1.24442	7.5475e-62	9.72856e-60	0.364213	0.156289
eF3	KLK6	15.0957	1.74567	1.72828e-51	1.77075e-49	0.278765	0.0926593
eF3	SCUBE2	14.356	1.09652	9.76712e-47	8.9719e-45	0.343486	0.162277
eF3	AP003716.1	13.9568	1.38064	2.8598e-44	2.40574e-42	0.290186	0.116876
eF4	MMP10	43.263	4.77268	0	0	0.425262	0.0675189
eF4	MAP3K5	40.3323	1.95665	0	0	0.521971	0.19076
eF4	EDNRB	37.8363	2.00466	0	0	0.49476	0.18557
eF4	LEFTY2	36.7944	2.78515	2.26969e-296	6.9764e-294	0.464975	0.183811
eF4	LGALS9	34.1663	1.74666	7.66811e-256	1.76772e-253	0.472513	0.192562
eF4	TNFRSF11B	33.1115	3.72023	2.03136e-240	4.02495e-238	0.334988	0.0556795
eF4	CDKN2B	32.7261	3.36493	6.65311e-235	1.2365e-232	0.330024	0.0499743
eF4	INHBA	30.1891	2.54424	3.29725e-200	4.87973e-198	0.37323	0.129333
eF4	IGFBP1	29.3301	4.22574	4.28954e-189	5.27393e-187	0.290678	0.0409231
eF4	SRPX2	28.8343	1.56738	7.97348e-183	9.37079e-181	0.43041	0.193248
eF4	BDKRB2	28.8214	1.56158	1.15615e-182	1.35213e-180	0.422688	0.182095
eF4	ABHD5	28.332	1.56455	1.39553e-176	1.51392e-174	0.425446	0.19372
eF4	ZDHHC14	28.2526	1.59128	1.32295e-175	1.42872e-173	0.402831	0.163864
eF4	SLC16A3	28.0451	1.88755	4.58793e-173	4.80331e-171	0.378746	0.148593
eF4	GNG4	27.9142	1.68039	1.79319e-171	1.8692e-169	0.39658	0.171671
eF4	SPHK1	27.7402	2.36627	2.29064e-169	2.31722e-167	0.317338	0.0809454
eF4	SMOX	27.5643	1.49851	2.98062e-167	2.97751e-165	0.408531	0.179007
eF4	CSF3R	27.2105	1.78617	4.88317e-163	4.68296e-161	0.362567	0.134223
eF4	ADCY1	27.0047	1.40838	1.30193e-160	1.17345e-158	0.413863	0.183768
eF4	SNX10	26.7487	1.7859	1.27953e-157	1.10348e-155	0.358706	0.137526
eF4	CD68	26.4181	1.68318	8.49066e-154	7.14258e-152	0.354477	0.128646
eF4	SPSB1	25.627	1.36207	7.63979e-145	5.96625e-143	0.409083	0.194749
eF4	AL139393.2	25.5169	2.19404	1.28068e-143	9.77841e-142	0.320096	0.10827
eF5-CXCL14	CXCL14	14.6982	3.86047	6.6222e-49	1.22129e-45	0.539084	0.153876
eF5-CXCL14	WISP2	12.3277	3.1029	6.42533e-35	3.14382e-32	0.455526	0.0965469
eF5-CXCL14	HOXA13	11.6768	3.36725	1.67437e-31	6.6905e-29	0.409704	0.0700141
eF5-CXCL14	ITM2A	11.4164	2.84581	3.46386e-30	1.26659e-27	0.428571	0.0994715
eF5-CXCL14	BHLHE41	11.3734	2.69342	5.67659e-30	2.00141e-27	0.436658	0.117935
eF5-CXCL14	TGFB3	9.30883	2.31292	1.29253e-20	2.13714e-18	0.398922	0.151691
eF5-CXCL14	VIPR2	9.24895	2.39306	2.2672e-20	3.64806e-18	0.369272	0.104827
eF5-CXCL14	BMP7	9.18941	3.22808	3.9499e-20	6.27145e-18	0.326146	0.0578929
eF5-CXCL14	PGF	8.71344	2.63276	2.94781e-18	3.99287e-16	0.3531	0.108069
eF5-CXCL14	CMIP	8.35747	2.10979	6.4075e-17	7.64278e-15	0.371968	0.150564
eF5-CXCL14	PPP2R2C	7.41215	2.55951	1.24269e-13	9.89818e-12	0.291105	0.0799859
eF5-CXCL14	CD34	7.39834	2.34477	1.37902e-13	1.09477e-11	0.299191	0.0865751
eF5-CXCL14	ATP1A2	6.79243	1.94549	1.10261e-11	6.67553e-10	0.312668	0.119803
eF5-CXCL14	CCBE1	6.74122	1.91517	1.57058e-11	9.27455e-10	0.307278	0.117794
eF5-CXCL14	CA4	6.39862	2.1042	1.56792e-10	8.10149e-09	0.280323	0.098062
eF5-CXCL14	PERP	6.37355	1.55725	1.84704e-10	9.38197e-09	0.347709	0.186575
eF5-CXCL14	ACVRL1	6.14912	1.53074	7.79118e-10	3.5991e-08	0.345013	0.193199
eF5-CXCL14	CPVL	5.78345	2.85071	7.31822e-09	2.8763e-07	0.210243	0.038055
eF5-CXCL14	IL33	5.65823	1.68197	1.52939e-08	5.68483e-07	0.285714	0.129493
eF5-CXCL14	KRT17	5.57192	2.26615	2.51949e-08	9.04264e-07	0.253369	0.1
eF5-CXCL14	ANO4	5.4315	1.76354	5.58836e-08	1.89734e-06	0.266846	0.120261
eF5-CXCL14	CGNL1	5.35357	1.4547	8.62353e-08	2.82444e-06	0.309973	0.172657
eF5-CXCL14	CADPS	5.32858	2.86893	9.89843e-08	3.18972e-06	0.19407	0.035518
eF5-CXCL14	GFRA2	5.28888	2.89585	1.23068e-07	3.88742e-06	0.191375	0.0338266
eF5-CXCL14	TNFRSF4	5.28499	2.23051	1.2571e-07	3.96567e-06	0.22372	0.0712826
eF5-CXCL14	LAMP5	5.14683	1.46378	2.64921e-07	7.88026e-06	0.283019	0.137632
eF5-CXCL14	TGFBR3L	5.145	2.13452	2.6752e-07	7.9477e-06	0.221024	0.0737139
eF5-CXCL14	OSR1	5.10539	2.53221	3.3012e-07	9.55872e-06	0.191375	0.0383721
eF5-CXCL14	EDN3	4.92427	1.47262	8.46773e-07	2.20667e-05	0.291105	0.164341
eF5-CXCL14	KLK4	4.57448	1.77921	4.7741e-06	0.000104433	0.250674	0.129528
eF5-CXCL14	C7	4.44195	1.33961	8.91458e-06	0.00018036	0.280323	0.153559
eF5-CXCL14	CD40	4.42929	1.78843	9.45456e-06	0.000190322	0.207547	0.0794221
eF5-CXCL14	PER3	4.38366	1.20374	1.16702e-05	0.00022859	0.299191	0.189676
eF5-CXCL14	HPSE2	4.34122	1.6908	1.41691e-05	0.000269393	0.231806	0.116631
dS1-myofibroblast	PAGE4	31.032	2.28202	1.99282e-211	2.27514e-208	0.511916	0.192113
dS1-myofibroblast	LCP1	24.9469	1.74181	2.30654e-137	8.37867e-135	0.428012	0.16677
dS1-myofibroblast	AC027288.3	19.508	1.53348	9.39182e-85	1.5112e-82	0.381325	0.181057
dS1-myofibroblast	CDC42EP3	18.9607	1.28058	3.60264e-80	5.26667e-78	0.386876	0.179889
dS1-myofibroblast	ULK4	18.9363	1.40176	5.72913e-80	8.3246e-78	0.367287	0.163539
dS1-myofibroblast	CES1	16.4575	1.68347	7.4127e-61	8.0416e-59	0.295788	0.122625
dS1-myofibroblast	ASIP	16.012	1.15253	1.05436e-57	1.07112e-55	0.349331	0.176619
dS2	TMEM196	20.4233	1.49622	1.0376e-92	2.67488e-90	0.444634	0.199985
dS2	ABCC8	17.0635	1.42185	2.77472e-65	4.37657e-63	0.369816	0.162388
dS2	MACC1	16.4282	1.56355	1.20226e-60	1.64709e-58	0.341599	0.14323
dS2	ASIP	14.6909	1.20934	7.37561e-49	8.03774e-47	0.357845	0.1806
dS2	AP003716.1	13.7252	1.49973	7.16872e-43	6.76654e-41	0.284737	0.117522
dS2	SP5	13.1816	1.33426	1.12051e-39	9.59438e-38	0.288157	0.126003
dS2	CILP	12.8569	1.10492	7.8624e-38	6.50004e-36	0.318085	0.160571
dS2	CXCL14	12.7298	1.16293	4.03853e-37	3.21673e-35	0.303976	0.145994
dS2	MEDAG	12.5487	0.91337	4.03856e-36	3.0738e-34	0.354425	0.196539
dS2	SCARA5	12.1567	1.52127	5.28738e-34	3.80676e-32	0.224455	0.0706118
fib C7-ov1	C7	6.92063	1.81988	4.49639e-12	8.7643e-10	0.44	0.1532
fib C7-ov1	TCF21	6.49812	1.93335	8.13304e-11	1.24197e-08	0.39	0.124164
fib C7-ov1	BEX2	6.47954	2.25884	9.20018e-11	1.39604e-08	0.36	0.104445
fib C7-ov1	ETV1	6.18483	2.00578	6.21695e-10	8.37368e-08	0.375	0.142167
fib C7-ov1	BHLHE41	5.68324	2.11645	1.32165e-08	1.40206e-06	0.335	0.120556
fib C7-ov1	TSPAN8	5.30497	2.76561	1.12695e-07	9.64948e-06	0.27	0.0575461
fib C7-ov1	ATP1B1	4.63152	1.6614	3.62993e-06	0.000207703	0.305	0.123078
fib C7-ov1	NSG1	4.61648	2.55494	3.9031e-06	0.000219552	0.255	0.0764597
fib C7-ov1	LAMP5	4.6161	1.78005	3.91026e-06	0.000219552	0.31	0.138314
fib C7-ov1	ATP1A2	4.50941	1.76973	6.50084e-06	0.000341793	0.295	0.121082
fib C7-ov1	TMEM100	4.50283	1.93349	6.70544e-06	0.000351011	0.275	0.0983153
fib C7-ov1	CSRNP3	4.39357	1.48134	1.11504e-05	0.000543356	0.315	0.149452
fib C7-ov1	TCEAL2	4.34986	2.17153	1.36226e-05	0.000644185	0.24	0.0637806
fib C7-ov1	GATM	4.32827	2.63189	1.50288e-05	0.000694248	0.225	0.051802
fib C7-ov1	RIC3	4.17148	1.69817	3.02621e-05	0.00122764	0.26	0.0914504
fib C7-ov1	RNASE1	4.16951	2.23356	3.05261e-05	0.00123626	0.235	0.0674232
fib C7-ov1	HOPX	4.13653	1.41306	3.52596e-05	0.00138809	0.315	0.157403
fib C7-ov1	CHL1	4.11624	2.12987	3.85097e-05	0.00149639	0.215	0.0439564
fib C7-ov1	TNFSF10	3.90282	1.45291	9.50773e-05	0.00313546	0.28	0.127421
fib C7-ov1	G0S2	3.80617	1.55898	0.000141136	0.00442319	0.255	0.104585
fib C7-ov1	SEMA3C	3.78773	1.35611	0.000152031	0.0046971	0.285	0.138909
fib C7-ov1	CHGB	3.74622	3.05271	0.000179522	0.00538004	0.195	0.0465133
fib C7-ov1	CLCN5	3.71543	1.82442	0.000202861	0.00593846	0.25	0.108543
fib C7-ov1	PKP2	3.65003	2.35506	0.000262211	0.00733549	0.195	0.0477742
fib C7-ov1	CMIP	3.63809	1.42905	0.000274664	0.00758647	0.285	0.152499
fib C7-ov1	IGKC	3.61184	1.36648	0.000304029	0.00829248	0.31	0.185948
fib C7-ov1	CPVL	3.5963	2.4745	0.00032277	0.00871442	0.185	0.0392631
fib C7-ov1	KLHDC8A	3.5632	2.45311	0.000366359	0.00969291	0.18	0.0338692
fib C7-ov1	IGLC2	3.55062	1.67502	0.000384323	0.0100263	0.235	0.093657
fib C7-ov1	CFH	3.50284	0.687813	0.000460327	0.0116663	0.35	0.19607
fib C7-ov1	RGN	3.49955	1.42553	0.00046604	0.0117862	0.3	0.182305
fib C7-ov1	GPC3	3.47911	1.62037	0.000503089	0.012551	0.215	0.071346
fib C7-ov1	PID1	3.47299	1.66783	0.000514687	0.0127476	0.245	0.115232
fib C7-ov1	TRABD2A	3.44831	3.04797	0.000564102	0.0136748	0.17	0.0301566
fib C7-ov1	ZNF483	3.39559	1.86868	0.000684802	0.016049	0.21	0.0763896
fib C7-ov1	BMP7	3.38795	2.09314	0.000704161	0.0164384	0.195	0.0604182
fib C7-ov1	DMKN	3.38406	1.61756	0.000714236	0.0166574	0.225	0.0918006
fib C7-ov1	PPP1R1B	3.37153	4.72906	0.000747518	0.0172592	0.15	0.0131344
fib C7-ov1	DPYSL3	3.36801	1.12023	0.000757133	0.0173872	0.31	0.186403
fib C7-ov1	SIGLEC11	3.35046	2.73481	0.000806785	0.0183069	0.165	0.0281601
fib C7-ov1	MIR202HG	3.28474	2.94541	0.00102077	0.0220677	0.16	0.0258835
fib C7-ov1	VIPR2	3.25101	1.69219	0.00114995	0.0240968	0.23	0.107387
fib C7-ov1	CADPS2	3.21937	1.26496	0.00128473	0.0262625	0.26	0.137298
fib C7-ov1	CADPS	3.20845	2.97623	0.00133451	0.0269772	0.165	0.0366712
fib C7-ov1	NRP2	3.17587	1.316	0.0014939	0.0292616	0.27	0.152359
fib C7-ov1	CGNL1	3.04316	1.21701	0.00234104	0.0417298	0.28	0.173689
fib C7-ov1	PTGIS	3.03004	0.875605	0.0024452	0.0431252	0.265	0.138104
fib C7-ov1	CD40	3.02743	1.639	0.00246643	0.0434161	0.2	0.0802424
fib C7-ov1	LMO3	3.01919	3.08369	0.00253453	0.0442252	0.15	0.0286505
fib C7-ov1	TCEA3	2.923	1.0592	0.00346677	0.0562734	0.275	0.165143
fib C7-ov1	DMD	2.90668	1.02483	0.00365283	0.0586581	0.225	0.102273
fib C7-ov1	ARX	2.90389	1.93714	0.00368555	0.0590255	0.155	0.0345697
fib C7-ov1	SLC1A3	2.88407	3.15282	0.00392566	0.0619195	0.14	0.0231866
fib C7-ov1	NCAM1	2.86417	1.85263	0.00418107	0.064839	0.165	0.0474239
fib C7-ov1	NKD1	2.84184	1.6263	0.00448538	0.0682775	0.195	0.083885
fib C7-ov1	ARHGAP18	2.83825	1.25049	0.0045361	0.068831	0.23	0.120591
fib C7-ov1	ENC1	2.83484	1.19534	0.00458481	0.0692197	0.255	0.148366
fib C7-ov1	HOXA13	2.83404	1.79105	0.00459642	0.0693513	0.185	0.0736226
fib C7-ov1	SPRY2	2.83286	1.30634	0.00461342	0.0695203	0.26	0.16073
fib C7-ov1	COLEC12	2.82457	0.981019	0.00473439	0.0707209	0.265	0.15425
fib C7-ov1	TSTD1	2.81381	1.3143	0.00489578	0.0723213	0.21	0.0971244
fib C7-ov2	C7	46.7076	4.94026	0	0	0.745486	0.117704
fib C7-ov2	CFH	45.7626	3.65954	0	0	0.768783	0.160835
fib C7-ov2	NRP2	42.8656	3.96692	0	0	0.68608	0.119331
fib C7-ov2	S100A10	40.629	3.25893	0	0	0.717531	0.179626
fib C7-ov2	ATP1B1	39.2487	4.16149	0	0	0.623762	0.0926241
fib C7-ov2	SEMA3C	39.0382	3.8353	0	0	0.630751	0.108752
fib C7-ov2	SCN7A	38.5491	6.05988	0	0	0.568433	0.0188281
fib C7-ov2	CLDN11	38.2738	4.77108	0	0	0.584741	0.0456462
fib C7-ov2	DPYSL3	37.4727	3.17775	2.5684e-307	2.93226e-304	0.6424	0.158356
fib C7-ov2	RNASE1	36.8928	5.14814	6.02812e-298	6.02184e-295	0.55795	0.0375083
fib C7-ov2	IGKC	35.4754	3.13926	1.17615e-275	9.72353e-273	0.618521	0.159392
fib C7-ov2	CHL1	34.7625	6.05868	8.97692e-265	6.94263e-262	0.511357	0.015536
fib C7-ov2	PRELP	34.5137	2.65041	4.99124e-261	3.419e-258	0.644729	0.183436
fib C7-ov2	ITM2A	34.1778	3.73595	5.17232e-256	3.26333e-253	0.551543	0.0752756
fib C7-ov2	DIRAS3	32.8618	5.14932	7.72695e-237	4.21031e-234	0.495632	0.0328845
fib C7-ov2	PTGIS	32.1357	2.91812	1.39767e-226	6.98105e-224	0.562027	0.112118
fib C7-ov2	TSPAN8	31.4659	4.50763	2.5475e-217	1.13104e-214	0.481654	0.0321817
fib C7-ov2	NSG1	31.2738	4.22404	1.05972e-214	4.53694e-212	0.488643	0.0516017
fib C7-ov2	NR4A2	30.8468	3.6489	6.18488e-209	2.43086e-206	0.52184	0.112599
fib C7-ov2	TCF21	30.7457	3.08911	1.3979e-207	5.31977e-205	0.531159	0.100281
fib C7-ov2	ARX	30.4556	6.00429	1.00966e-203	3.61294e-201	0.446709	0.0092846
fib C7-ov2	ECEL1	30.3916	5.62754	7.09754e-203	2.46614e-200	0.449621	0.015351
fib C7-ov2	DHRS2	29.8267	7.21541	1.76183e-195	5.70811e-193	0.433314	0.00558556
fib C7-ov2	FIBIN	29.6406	4.63526	4.4823e-193	1.41399e-190	0.451951	0.0292595
fib C7-ov2	IGLC2	29.5914	3.4851	1.92772e-192	5.85027e-190	0.483984	0.069912
fib C7-ov2	CDC42EP3	28.7565	2.44516	7.51373e-182	2.07059e-179	0.553291	0.179626
fib C7-ov2	DLK1	28.0118	5.55686	1.16616e-172	2.8241e-170	0.418754	0.019457
fib C7-ov2	GPC3	27.5862	3.78405	1.62969e-167	3.65157e-165	0.441468	0.0489014
fib C7-ov2	KLHDC8A	27.5496	5.61519	4.46985e-167	9.92265e-165	0.406523	0.0112821
fib C7-ov2	MMP23B	27.4094	2.72115	2.12056e-165	4.53933e-163	0.497962	0.1298
fib C7-ov2	PDLIM3	26.8227	2.65302	1.75602e-158	3.39521e-156	0.499126	0.122401
fib C7-ov2	CMYA5	26.8188	3.48687	1.95314e-158	3.74612e-156	0.443215	0.0724273
fib C7-ov2	MATN2	26.5124	2.29194	6.98344e-155	1.31833e-152	0.534653	0.191869
fib C7-ov2	STAR	26.0201	3.11805	2.93444e-149	5.28972e-147	0.470588	0.141341
fib C7-ov2	UBXN8	26.0076	2.85939	4.06556e-149	7.27401e-147	0.480489	0.155138
fib C7-ov2	ACSM3	25.4185	2.97491	1.57606e-142	2.58808e-140	0.449621	0.106052
fib C7-ov2	SIGLEC11	23.9806	5.65994	4.43444e-127	6.14541e-125	0.352941	0.0085448
fib C7-ov2	COL8A1	23.9598	2.27614	7.30073e-127	1.00595e-124	0.470006	0.13361
fib C7-ov2	WISP2	23.6868	2.78302	4.93068e-124	6.49523e-122	0.418171	0.0810461
fib C7-ov2	DMKN	23.67	3.14938	7.34491e-124	9.62264e-122	0.401281	0.0731301
fib C7-ov2	RASL11B	23.6257	2.94068	2.10031e-123	2.69278e-121	0.429819	0.119997
fib C7-ov2	ALKAL2	23.5028	3.58465	3.81823e-122	4.818e-120	0.381479	0.0477547
fib C7-ov2	CHGB	23.3553	4.4954	1.21621e-120	1.48768e-118	0.359348	0.0277428
fib C7-ov2	G0S2	23.1765	2.86204	7.86662e-119	9.43012e-117	0.409435	0.0863357
fib C7-ov2	GATM	23.1739	3.79064	8.3558e-119	9.96668e-117	0.365754	0.0331434
fib C7-ov2	TCEA3	22.7365	2.20353	1.95268e-114	2.23998e-112	0.452533	0.147703
fib C7-ov2	GATA6	22.6604	3.51466	1.10189e-113	1.25203e-111	0.365172	0.042724
fib C7-ov2	HS3ST1	22.1014	3.96849	3.06439e-108	3.27986e-106	0.347117	0.0321817
fib C7-ov2	PRKAR2B	22.0814	2.08405	4.77006e-108	5.08277e-106	0.468841	0.19076
fib C7-ov2	TNFSF10	22.0452	2.37134	1.06262e-107	1.12727e-105	0.418171	0.110084
fib C7-ov2	ST3GAL4	22.0285	2.17596	1.53642e-107	1.62272e-105	0.45661	0.18658
fib C7-ov2	KRT18	21.9537	2.26608	7.98347e-107	8.25016e-105	0.424578	0.117778
fib C7-ov2	RIC3	21.6389	2.76544	7.73215e-104	7.789e-102	0.379732	0.0743878
fib C7-ov2	CAVIN2	21.5514	2.29031	5.13739e-103	5.13204e-101	0.426325	0.135496
fib C7-ov2	SGK1	21.4401	3.31545	5.64946e-102	5.5284e-100	0.364007	0.0671007
fib C7-ov2	RPP25	21.3215	2.52928	7.17553e-101	6.90897e-99	0.397787	0.111563
fib C7-ov2	ARHGAP29	21.2328	1.62835	4.75106e-100	4.53811e-98	0.489808	0.185285
fib C7-ov2	PLXDC2	21.1046	1.84133	7.22087e-99	6.71009e-97	0.465347	0.187431
fib C7-ov2	GATA4	21.0911	5.20371	9.59753e-99	8.8842e-97	0.313337	0.0106902
fib C7-ov2	PDGFRL	20.8572	1.9361	1.31012e-96	1.16766e-94	0.44438	0.169934
fib C7-ov2	TCEAL2	20.7186	3.28343	2.35412e-95	2.0674e-93	0.341875	0.0474218
fib C7-ov2	ANK2	20.6934	2.55059	3.97087e-95	3.46187e-93	0.377402	0.0877044
fib C7-ov2	SGCD	20.6128	3.36276	2.10735e-94	1.81088e-92	0.338963	0.0479026
fib C7-ov2	ENC1	20.5874	2.33806	3.56057e-94	3.04874e-92	0.407688	0.132685
fib C7-ov2	ITGA11	20.4095	2.75396	1.37721e-92	1.1545e-90	0.361095	0.073463
fib C7-ov2	BMPR1B	20.3436	4.62894	5.29516e-92	4.4234e-90	0.308678	0.0182733
fib C7-ov2	CNTN1	20.3053	1.88122	1.15359e-91	9.53701e-90	0.446709	0.184508
fib C7-ov2	NCAM1	20.1917	3.69354	1.15729e-90	9.40541e-89	0.319744	0.030998
fib C7-ov2	BOC	20.0654	2.26434	1.48108e-89	1.19558e-87	0.386721	0.108604
fib C7-ov2	RASGRF2	19.63	5.45497	8.57535e-86	6.61074e-84	0.290623	0.00954354
fib C7-ov2	TRABD2A	19.578	5.03292	2.38263e-85	1.81344e-83	0.294118	0.0144263
fib C7-ov2	ARHGAP18	19.4048	2.34655	7.02631e-84	5.24784e-82	0.372161	0.105423
fib C7-ov2	TFRC	19.3012	2.87095	5.2432e-83	3.86787e-81	0.378567	0.130465
fib C7-ov2	PEG10	19.2679	2.27037	9.98807e-83	7.32306e-81	0.384391	0.124732
fib C7-ov2	CD22	19.2629	4.54272	1.10102e-82	8.04783e-81	0.291788	0.0158689
fib C7-ov2	MIR202HG	19.0397	4.7253	7.9985e-81	5.7243e-79	0.284799	0.0104313
fib C7-ov2	ABCA10	19.0294	3.32652	9.74428e-81	6.93231e-79	0.308096	0.0362876
fib C7-ov2	CLCN5	19.0216	2.61806	1.13053e-80	8.01908e-79	0.352359	0.0941037
fib C7-ov2	BEX2	18.9138	2.40787	8.78069e-80	6.20994e-78	0.354106	0.0904787
fib C7-ov2	WIPF3	18.5483	3.94806	8.42394e-77	5.64145e-75	0.289458	0.0242657
fib C7-ov2	LY96	18.3878	2.8818	1.64513e-75	1.06889e-73	0.315084	0.0540431
fib C7-ov2	TFPI2	18.3395	3.25972	4.00418e-75	2.5876e-73	0.308678	0.0510098
fib C7-ov2	EZR	18.2013	2.16499	5.04362e-74	3.19052e-72	0.370414	0.124066
fib C7-ov2	PDLIM5	18.1312	1.45556	1.80681e-73	1.13696e-71	0.448457	0.194385
fib C7-ov2	ARHGEF28	18.0957	3.29325	3.44415e-73	2.13368e-71	0.298195	0.0421691
fib C7-ov2	TSTD1	18.0318	2.34832	1.09748e-72	6.71228e-71	0.337216	0.0827107
fib C7-ov2	LMCD1	17.8916	1.79515	1.3711e-71	8.11658e-70	0.399534	0.160058
fib C7-ov2	SLC2A3	17.7646	1.96146	1.32992e-70	7.70163e-69	0.417006	0.194533
fib C7-ov2	LAMP5	17.7579	2.14825	1.49783e-70	8.63231e-69	0.365172	0.125176
fib C7-ov2	SPRR2F	17.6565	5.98614	9.07005e-70	5.17749e-68	0.258591	0.00495672
fib C7-ov2	CLIP4	17.4503	2.31987	3.42601e-68	1.8796e-66	0.334304	0.0936968
fib C7-ov2	IFI44L	17.3342	3.07516	2.59516e-67	1.40767e-65	0.294118	0.0481986
fib C7-ov2	IGHG1	17.0715	3.6345	2.41839e-65	1.24422e-63	0.271404	0.0279648
fib C7-ov2	FRRS1L	17.0687	3.01508	2.53944e-65	1.30092e-63	0.2947	0.0573352
fib C7-ov2	DMD	16.9419	2.03098	2.20782e-64	1.09591e-62	0.333139	0.0885182
fib C7-SFRP2	S100A10	38.406	3.77857	0	0	0.704033	0.185356
fib C7-SFRP2	CFH	37.6027	3.33957	0	3.10295e-306	0.704716	0.169928
fib C7-SFRP2	PTGIS	35.5032	3.89183	4.38146e-276	4.56719e-273	0.621326	0.113127
fib C7-SFRP2	SFRP2	34.2651	7.26605	2.59452e-257	2.22156e-254	0.54067	0.0135224
fib C7-SFRP2	C7	32.7341	4.28884	5.10951e-235	3.22369e-232	0.594668	0.131633
fib C7-SFRP2	PRELP	32.0896	2.69958	6.16618e-226	3.69585e-223	0.645933	0.187665
fib C7-SFRP2	PLXDC2	31.1277	2.86013	1.01608e-212	4.97154e-210	0.606972	0.182425
fib C7-SFRP2	FGF7	30.9373	2.675	3.7658e-210	1.7703e-207	0.626794	0.198256
fib C7-SFRP2	BOC	29.3545	3.37051	2.09206e-189	7.59958e-187	0.531784	0.103415
fib C7-SFRP2	PODN	28.7845	2.7678	3.35176e-182	1.07145e-179	0.572796	0.179273
fib C7-SFRP2	ADH1B	28.6439	5.96574	1.91016e-180	5.94754e-178	0.457963	0.0189827
fib C7-SFRP2	MMP23B	28.2541	3.27528	1.26681e-175	3.70387e-173	0.526316	0.131706
fib C7-SFRP2	PDGFD	27.2572	3.9111	1.36441e-163	3.37233e-161	0.474368	0.0740619
fib C7-SFRP2	SLIT2	26.5152	3.90408	6.46809e-155	1.42268e-152	0.453178	0.0481164
fib C7-SFRP2	COLEC12	26.1509	2.88601	9.63801e-151	2.02694e-148	0.508544	0.136067
fib C7-SFRP2	RSPO3	25.1718	2.90822	8.16248e-140	1.47139e-137	0.498291	0.145558
fib C7-SFRP2	PDGFRL	24.8043	2.80886	8.04862e-136	1.40851e-133	0.507861	0.169085
fib C7-SFRP2	FZD7	24.7639	3.67896	2.19827e-135	3.79162e-133	0.429938	0.0525139
fib C7-SFRP2	SAMHD1	24.6776	2.94333	1.86328e-134	3.16823e-132	0.492823	0.157322
fib C7-SFRP2	DCLK1	24.4413	3.90501	6.23167e-132	1.02332e-129	0.421053	0.0517077
fib C7-SFRP2	ZFHX4	24.3791	4.13399	2.84692e-131	4.64319e-129	0.408749	0.0347772
fib C7-SFRP2	ABCA6	23.9077	2.29313	2.54909e-126	3.91758e-124	0.523582	0.190413
fib C7-SFRP2	PDK4	23.8322	2.82358	1.54764e-125	2.36336e-123	0.496924	0.166447
fib C7-SFRP2	NAV1	23.766	2.80592	7.49917e-125	1.1237e-122	0.462748	0.125037
fib C7-SFRP2	PDLIM3	23.1058	2.67283	4.04485e-118	5.38752e-116	0.4689	0.127529
fib C7-SFRP2	CHRDL1	22.3617	4.03631	9.29495e-111	1.1032e-108	0.378674	0.0352536
fib C7-SFRP2	CDON	21.0731	4.01133	1.40345e-98	1.42575e-96	0.356801	0.0343008
fib C7-SFRP2	OSR1	20.8696	4.50125	1.0111e-96	1.00586e-94	0.344498	0.0240399
fib C7-SFRP2	TNFSF10	20.8654	2.41519	1.10491e-96	1.09464e-94	0.425154	0.112577
fib C7-SFRP2	DPT	20.862	2.9262	1.18628e-96	1.17042e-94	0.435407	0.152998
fib C7-SFRP2	GPX3	20.7385	2.57734	1.5566e-95	1.49278e-93	0.414901	0.102682
fib C7-SFRP2	COL8A1	20.5823	2.22021	3.95866e-94	3.72192e-92	0.446343	0.138009
fib C7-SFRP2	WISP2	20.4702	3.22226	3.97249e-93	3.69149e-91	0.390294	0.0856787
fib C7-SFRP2	CLDN11	20.1179	2.93299	5.14668e-90	4.60417e-88	0.372522	0.0620419
fib C7-SFRP2	COL6A6	19.7608	4.75891	6.47635e-87	5.54537e-85	0.331511	0.0340443
fib C7-SFRP2	KIAA1324L	19.6603	4.59744	4.71576e-86	3.96703e-84	0.330827	0.0337145
fib C7-SFRP2	USP53	19.5692	2.40184	2.82918e-85	2.34705e-83	0.414901	0.130937
fib C7-SFRP2	GATA6	19.2663	3.3832	1.03029e-82	8.28903e-81	0.34108	0.047017
fib C7-SFRP2	PIEZO2	18.3585	3.68675	2.82549e-75	2.00418e-73	0.318524	0.0374157
fib C7-SFRP2	ZFPM2	17.5866	2.59312	3.12287e-69	2.00726e-67	0.351333	0.0921651
fib C7-SFRP2	STEAP1	17.507	3.10132	1.26797e-68	8.04222e-67	0.321941	0.0587071
fib C7-SFRP2	CADM3	17.3018	4.61835	4.55704e-67	2.79425e-65	0.28298	0.0155013
fib C7-SFRP2	G0S2	17.3	2.40114	4.70664e-67	2.87861e-65	0.353383	0.0923483
fib C7-SFRP2	FGL2	17.1101	3.92575	1.24745e-65	7.31236e-64	0.29255	0.0301964
fib C7-SFRP2	CELF2	17.0749	2.04637	2.28046e-65	1.33027e-63	0.388243	0.142993
fib C7-SFRP2	DPYSL3	16.9947	1.64623	8.98931e-65	5.21837e-63	0.427204	0.174399
fib C7-SFRP2	ABCA9	16.9371	2.398	2.39727e-64	1.37829e-62	0.352016	0.0971489
fib C7-SFRP2	KRT8	16.5024	2.48286	3.52396e-61	1.9158e-59	0.337662	0.0926048
fib C7-SFRP2	PCDH7	16.3947	2.22769	2.08535e-60	1.11103e-58	0.353383	0.111478
fib C7-SFRP2	GLI3	16.3308	2.03535	5.95788e-60	3.13934e-58	0.380725	0.156442
fib C7-SFRP2	C16orf89	16.3182	6.80444	7.32781e-60	3.85273e-58	0.256323	0.00384785
fib C7-SFRP2	CD34	16.2094	3.00049	4.32818e-59	2.24606e-57	0.315106	0.0772134
fib C7-SFRP2	VCAM1	16.133	2.27958	1.49524e-58	7.64357e-57	0.344498	0.103745
fib C7-SFRP2	STEAP2	15.8384	2.29525	1.68966e-56	8.21693e-55	0.336295	0.102316
fib C7-SFRP2	ITM2A	15.811	2.59483	2.61178e-56	1.265e-54	0.326042	0.0917986
fib C7-SFRP2	INMT	15.6455	3.02175	3.5628e-55	1.67486e-53	0.285714	0.0444518
fib C7-SFRP2	VSIR	15.4446	1.59804	8.2059e-54	3.76169e-52	0.403964	0.182681
fib C7-SFRP2	AHR	15.4356	2.3374	9.43656e-54	4.30117e-52	0.315106	0.0795221
fib C7-SFRP2	GAS7	15.2046	1.70351	3.29845e-52	1.47538e-50	0.393712	0.185283
fib C7-SFRP2	CSF1	15.1625	2.3796	6.26483e-52	2.79701e-50	0.305537	0.0747581
fib C7-SFRP2	AOX1	15.0054	3.53769	6.76972e-51	2.95098e-49	0.260424	0.0293902
fib C7-SFRP2	MBP	14.9305	3.11143	2.08758e-50	9.03423e-49	0.272727	0.0444518
fib C7-SFRP2	PLXDC1	14.9133	1.74182	2.70069e-50	1.1583e-48	0.363636	0.140978
fib C7-SFRP2	ARHGAP18	14.8161	1.97338	1.1522e-49	4.88057e-48	0.331511	0.110085
fib C7-SFRP2	HMCN1	14.7165	2.91334	5.04841e-49	2.11232e-47	0.274778	0.051268
fib C7-SFRP2	ROR1	14.281	1.93549	2.87607e-46	1.14162e-44	0.341763	0.138596
fib C7-SFRP2	ATP1B1	13.9946	1.85491	1.68126e-44	6.39811e-43	0.324675	0.113603
fib C7-SFRP2	JADE1	13.9775	1.75829	2.13802e-44	8.11062e-43	0.354751	0.157908
fib C7-SFRP2	SKAP2	13.8849	2.01143	7.82246e-44	2.93955e-42	0.298701	0.0852023

## Sheet: endothelial
Supplementary Table 2. Markers genes expressed by each cell subpopulation
cluster	gene	score	logfc	pval	pval_fdr	in_group_fraction	out_group_fraction
LEC	CCL21	31.023	13.0873	2.63672e-211	2.73428e-207	0.946667	0.0111643
LEC	TFF3	27.9615	8.21196	4.77627e-172	1.23825e-168	0.858667	0.0312845
LEC	PROX1	27.8589	5.86607	8.40772e-171	1.93751e-167	0.872	0.105999
LEC	TBX1	24.8572	5.59391	2.16137e-136	1.79307e-133	0.781333	0.0612195
LEC	PDPN	24.5571	11.3042	3.62783e-133	2.68719e-130	0.749333	0.00171758
LEC	TSPAN5	22.7462	4.26922	1.56413e-114	7.54418e-112	0.749333	0.139369
LEC	FLT4	22.084	3.75242	4.50517e-108	1.90688e-105	0.754667	0.195436
LEC	MAF	21.8039	5.19519	2.13025e-105	8.663e-103	0.696	0.0630597
LEC	NR2F1	21.4951	4.1846	1.73029e-102	6.29582e-100	0.725333	0.130413
LEC	MRC1	20.5123	5.82484	1.67132e-93	4.95189e-91	0.645333	0.0380321
LEC	COLEC12	20.243	6.35773	4.09825e-91	1.1333e-88	0.629333	0.0207337
LEC	IGF1	19.8526	6.714	1.04669e-87	2.64736e-85	0.616	0.0215924
LEC	DOCK5	19.7886	5.88067	3.73485e-87	9.22152e-85	0.621333	0.029935
LEC	RELN	19.7192	7.9241	1.47607e-86	3.55974e-84	0.605333	0.00601153
LEC	CCDC80	19.265	4.22672	1.05719e-82	2.308e-80	0.645333	0.110539
LEC	FXYD6	19.152	3.69429	9.30785e-82	1.96985e-79	0.661333	0.128941
LEC	SEMA3D	18.6569	5.02837	1.11051e-77	2.11303e-75	0.6	0.0469881
LEC	LAPTM5	18.5772	3.91967	4.91211e-77	9.26156e-75	0.632	0.117409
LEC	PIEZO2	18.2691	5.10578	1.45848e-74	2.52075e-72	0.584	0.0422034
LEC	EFNA5	17.9757	7.86992	3.02195e-72	4.97422e-70	0.552	0.00588885
LEC	SLC24A1	17.7979	4.31061	7.33446e-71	1.1524e-68	0.589333	0.0890688
LEC	STON2	17.7931	9.12598	7.99002e-71	1.23666e-68	0.544	0.00196295
LEC	LOX	17.7374	4.98499	2.15692e-70	3.26529e-68	0.570667	0.0453932
LEC	SEMA3A	17.5792	4.91668	3.55788e-69	5.16018e-67	0.565333	0.0450252
LEC	PARD6G	16.948	7.19474	1.99033e-64	2.64612e-62	0.522667	0.00932401
LEC	CHRDL1	16.5013	9.89147	3.59032e-61	4.48574e-59	0.504	0.00110416
LEC	KBTBD11	15.7588	5.51382	5.97922e-56	6.66715e-54	0.498667	0.027972
LEC	APOD	15.7112	3.77813	1.26751e-55	1.40578e-53	0.552	0.103546
LEC	RAB11FIP1	15.5676	2.95746	1.20855e-54	1.27885e-52	0.584	0.156423
LEC	C6orf141	15.4203	3.0074	1.19531e-53	1.22122e-51	0.578667	0.159122
LEC	HOMER3	15.2094	3.08578	3.06256e-52	2.98204e-50	0.570667	0.193105
LEC	LYN	15.1418	2.95055	8.57819e-52	8.19869e-50	0.565333	0.164152
LEC	SYNM	14.7746	5.18893	2.13657e-49	1.91002e-47	0.472	0.0320206
LEC	VAV3	14.4757	5.53094	1.72447e-47	1.48405e-45	0.458667	0.025273
LEC	EDNRB	14.4392	3.22296	2.93257e-47	2.51328e-45	0.525333	0.10833
LEC	RASGRP3	14.3643	2.83536	8.67359e-47	7.31261e-45	0.554667	0.169304
LEC	RCSD1	14.362	5.86429	8.96441e-47	7.5272e-45	0.450667	0.01828
LEC	SGIP1	13.9502	5.40355	3.13696e-44	2.48323e-42	0.442667	0.0226966
LEC	FLRT2	13.808	2.58743	2.2818e-43	1.72089e-41	0.554667	0.17961
LEC	FRMD6	13.6948	3.85097	1.09041e-42	7.99117e-41	0.469333	0.0725064
LEC	VPS35L	13.6211	2.80524	3.00114e-42	2.16877e-40	0.528	0.167955
LEC	CTDSPL	13.4856	2.87568	1.90124e-41	1.34658e-39	0.509333	0.140474
LEC	ZDHHC14	13.444	3.71359	3.33885e-41	2.35537e-39	0.466667	0.0801129
LEC	MAP4K2	13.3688	3.78832	9.19813e-41	6.46676e-39	0.456	0.0641639
LEC	MPP7	13.1442	5.77588	1.83734e-39	1.24531e-37	0.413333	0.0165624
LEC	GRAP	13.0039	2.89815	1.16253e-38	7.63e-37	0.498667	0.153723
LEC	CCDC102B	12.7576	4.99203	2.82747e-37	1.77702e-35	0.410667	0.0294442
LEC	EMILIN1	12.7573	6.81504	2.83722e-37	1.77776e-35	0.394667	0.00748374
LEC	AC245595.1	12.6386	3.35614	1.29376e-36	8.00974e-35	0.456	0.104527
LEC	CD36	12.5931	3.60041	2.30513e-36	1.41027e-34	0.432	0.0517728
LEC	FILIP1	12.4439	2.26387	1.50877e-35	8.94057e-34	0.528	0.171267
LEC	SCN3A	12.4013	10.2072	2.57178e-35	1.51101e-33	0.378667	0.000613422
LEC	UNC5B	12.1961	3.88574	3.25994e-34	1.87809e-32	0.410667	0.0451478
LEC	DKK3	12.1659	4.88478	4.71982e-34	2.68926e-32	0.392	0.0263771
LEC	S100A4	12.0626	3.37201	1.66483e-33	9.23223e-32	0.456	0.118513
LEC	SMYD2	12.0571	4.08959	1.77872e-33	9.81136e-32	0.408	0.0586431
LEC	PTX3	11.9297	8.75848	8.28747e-33	4.49953e-31	0.365333	0.00208563
LEC	SGCE	11.9198	4.57327	9.32905e-33	5.05182e-31	0.386667	0.0274813
LEC	TNFRSF4	11.8409	3.1432	2.39936e-32	1.27925e-30	0.429333	0.0869832
LEC	IL7	11.7275	5.42897	9.21797e-32	4.82779e-30	0.370667	0.0166851
LEC	LYVE1	11.7092	5.45442	1.14378e-31	5.9753e-30	0.381333	0.0358238
LEC	IGFBP5	11.564	4.30199	6.26997e-31	3.20294e-29	0.394667	0.0553306
LEC	WFS1	11.5134	2.71707	1.12899e-30	5.75311e-29	0.450667	0.130781
LEC	NECTIN3	11.392	3.06567	4.58162e-30	2.30079e-28	0.418667	0.090541
LEC	DMTN	11.386	3.10859	4.91287e-30	2.46118e-28	0.416	0.08821
LEC	ADM	11.2007	4.56368	4.04711e-29	1.95658e-27	0.370667	0.0381548
LEC	TMEM98	11.0982	3.5346	1.27932e-28	5.97594e-27	0.381333	0.0494418
LEC	FLNC	10.8656	2.80609	1.68024e-27	7.65894e-26	0.410667	0.092872
LEC	MMP2	10.8255	2.2139	2.60736e-27	1.1833e-25	0.472	0.18648
LEC	KCTD17	10.8034	3.02073	3.31682e-27	1.49871e-25	0.4	0.0907864
LEC	FHL3	10.7646	2.76695	5.05884e-27	2.27593e-25	0.418667	0.122194
LEC	PTPN3	10.6994	6.90418	1.0244e-26	4.55925e-25	0.330667	0.00527543
LEC	LRRN4CL	10.6245	6.89255	2.29256e-26	1.0095e-24	0.328	0.00478469
LEC	ITM2C	10.5589	4.45684	4.62001e-26	2.013e-24	0.346667	0.0296896
LEC	KANK2	10.5182	2.85648	7.12501e-26	3.08502e-24	0.4	0.0992516
LEC	MICAL2	10.3725	4.0746	3.3083e-25	1.40892e-23	0.346667	0.0377868
LEC	KIAA1324L	10.3065	3.2459	6.58869e-25	2.78309e-23	0.368	0.0650227
LEC	PKHD1L1	10.2408	7.06745	1.30204e-24	5.46646e-23	0.317333	0.00662495
LEC	KLHL4	10.2138	3.74152	1.7195e-24	7.20454e-23	0.354667	0.055576
LEC	TMEM246	10.1946	3.42896	2.09677e-24	8.71483e-23	0.357333	0.0543492
LEC	MFAP2	10.185	3.26562	2.31265e-24	9.57372e-23	0.365333	0.0677218
LEC	NR2F2-AS1	10.1781	2.60312	2.48476e-24	1.02657e-22	0.402667	0.113238
LEC	PCSK6	10.137	5.59572	3.78681e-24	1.5583e-22	0.32	0.0137406
LEC	GJC2	10.0788	2.90578	6.85542e-24	2.79335e-22	0.392	0.105999
LEC	ABI3BP	10.02	2.18596	1.24554e-23	5.02577e-22	0.421333	0.124034
LEC	SMTN	9.96139	2.17895	2.24891e-23	9.00431e-22	0.445333	0.181818
LEC	TC2N	9.93121	5.82163	3.04528e-23	1.21694e-21	0.312	0.0110416
LEC	ALDH1A1	9.92511	1.97866	3.23751e-23	1.29127e-21	0.453333	0.173844
LEC	FAM189A2	9.82939	2.57794	8.41283e-23	3.28591e-21	0.405333	0.138879
LEC	GDF10	9.78951	5.60831	1.24899e-22	4.86007e-21	0.309333	0.0130045
LEC	LTBP4	9.78063	1.77876	1.36363e-22	5.29621e-21	0.464	0.189302
LEC	PHLDA1	9.69398	2.31781	3.19808e-22	1.22603e-20	0.416	0.147221
LEC	SRGAP3	9.66737	5.95617	4.14921e-22	1.58189e-20	0.304	0.011287
LEC	FAM174B	9.59686	3.93554	8.2419e-22	3.11929e-20	0.322667	0.0354558
LEC	USP31	9.52092	2.30511	1.71651e-21	6.42609e-20	0.410667	0.152865
LEC	NFIX	9.44044	2.04454	3.71235e-21	1.36757e-19	0.429333	0.174212
LEC	MYZAP	9.41444	4.1788	4.75612e-21	1.74279e-19	0.312	0.0293216
LEC	COL5A2	9.40742	4.32487	5.08448e-21	1.85983e-19	0.309333	0.0268679
LEC	PRKG1	9.3905	3.2157	5.97137e-21	2.17274e-19	0.338667	0.0629371
LEC	BCAT1	9.38844	2.38835	6.08929e-21	2.21177e-19	0.376	0.0956938
LEC	LINC01558	9.35551	3.93417	8.31991e-21	3.01143e-19	0.314667	0.0339836
LEC	MAP1B	9.12702	1.92652	7.04097e-20	2.46672e-18	0.432	0.190774
LEC	REEP1	9.12185	2.72319	7.38524e-20	2.58297e-18	0.354667	0.0922586
LEC	PDGFA	9.09857	2.7203	9.15294e-20	3.19045e-18	0.354667	0.0927494
LEC	GLT8D2	9.06725	3.71309	1.22055e-19	4.21203e-18	0.309333	0.0375414
LEC	EFCC1	8.96144	2.43674	3.20474e-19	1.08428e-17	0.370667	0.120108
LEC	SCN9A	8.95904	5.17427	3.27504e-19	1.10626e-17	0.285333	0.0137406
LEC	CHST15	8.91251	2.51545	4.98879e-19	1.67967e-17	0.376	0.132867
LEC	FHL1	8.911	2.17984	5.05734e-19	1.69999e-17	0.389333	0.139737
LEC	TSPAN11	8.79755	4.70987	1.39839e-18	4.61823e-17	0.285333	0.0203656
LEC	PDE1A	8.79522	6.8196	1.42769e-18	4.70751e-17	0.272	0.00453932
LEC	FAM102A	8.76878	3.82005	1.80606e-18	5.89884e-17	0.304	0.044289
EC-HEV	MT1E	39.9092	4.29344	0	0	0.860258	0.174671
EC-HEV	HOXD10	31.2289	2.81204	4.31664e-214	9.94745e-211	0.76115	0.180391
EC-HEV	MT1M	28.8522	3.65913	4.7488e-183	7.035e-180	0.638256	0.104829
EC-HEV	THY1	26.0742	2.54367	7.15685e-150	6.18472e-147	0.670961	0.182387
EC-HEV	EFEMP1	25.8168	2.64525	5.7482e-147	4.41547e-144	0.667988	0.173074
EC-HEV	ALDH1A1	25.0153	2.75457	4.16347e-138	2.7855e-135	0.600595	0.130504
EC-HEV	SPOCK1	23.8832	2.79154	4.58161e-126	2.37556e-123	0.565907	0.112146
EC-HEV	STXBP6	23.3722	2.58748	8.20559e-121	3.86782e-118	0.56888	0.119729
EC-HEV	CGNL1	22.7116	2.18303	3.44446e-114	1.45792e-111	0.607532	0.180258
EC-HEV	ZNF503	20.3315	2.00562	6.77318e-92	2.12842e-89	0.564916	0.178396
EC-HEV	THBS1	19.9548	2.02428	1.36178e-88	3.97794e-86	0.560951	0.18385
EC-HEV	MT1F	19.8342	3.60351	1.51027e-87	4.29082e-85	0.432111	0.0562724
EC-HEV	SLC39A8	19.1982	1.96028	3.82813e-82	1.005e-79	0.543112	0.191433
EC-HEV	PART1	18.4816	3.51234	2.90196e-76	6.61392e-74	0.402379	0.0494878
EC-HEV	PCDH7	17.7586	3.12933	1.47942e-70	3.1632e-68	0.397423	0.0556073
EC-HEV	ABI3BP	17.3862	2.43113	1.05033e-67	2.05508e-65	0.433102	0.0973793
EC-HEV	DPP4	17.3762	1.99631	1.25039e-67	2.42365e-65	0.478692	0.148597
EC-HEV	AC004540.2	17.3219	2.24829	3.21347e-67	5.95065e-65	0.442022	0.107224
EC-HEV	CDH11	16.9219	2.23319	3.10279e-64	5.14815e-62	0.442022	0.120793
EC-HEV	NR2F1	16.6082	1.92649	6.08247e-62	9.485e-60	0.444004	0.117999
EC-HEV	SNCA	16.6004	1.69776	6.92734e-62	1.07219e-59	0.502478	0.195025
EC-HEV	EMP3	16.4752	1.61742	5.5287e-61	8.43127e-59	0.49554	0.171478
EC-HEV	FOLH1	15.75	2.59073	6.87128e-56	9.37568e-54	0.379584	0.0802182
EC-HEV	SMIM3	15.4999	2.18872	3.4717e-54	4.58618e-52	0.398414	0.100439
EC-HEV	SLC5A3	15.38	1.75065	2.23096e-53	2.87392e-51	0.457879	0.16629
EC-HEV	RXFP1	15.3244	2.40531	5.25581e-53	6.5666e-51	0.377602	0.0840761
EC-HEV	SAMD5	15.2222	1.77794	2.51786e-52	3.05382e-50	0.451933	0.167221
EC-HEV	CDH12	14.8309	2.86122	9.24352e-50	1.05917e-47	0.339941	0.0541439
EC-HEV	STARD4	14.311	1.57236	1.86853e-46	2.03965e-44	0.444995	0.171212
EC-HEV	COL3A1	14.233	1.99274	5.71419e-46	6.04654e-44	0.411298	0.151656
EC-HEV	FHL2	14.1675	2.23377	1.45604e-45	1.5329e-43	0.3667	0.0971132
EC-HEV	TMEM37	13.9791	2.18139	2.09049e-44	2.1047e-42	0.361744	0.0935214
EC-HEV	AFF3	13.9602	2.49676	2.72684e-44	2.73211e-42	0.338949	0.0707729
EC-HEV	PTGFRN	13.8274	1.90765	1.74303e-43	1.68928e-41	0.378593	0.112013
EC-HEV	KCNC4	13.8028	1.44861	2.44983e-43	2.36323e-41	0.45887	0.19702
EC-HEV	KANK1	13.3955	1.70508	6.42804e-41	5.72179e-39	0.401388	0.14873
EC-HEV	BCAT1	13.389	2.50784	7.00873e-41	6.21201e-39	0.332012	0.0779566
EC-HEV	TNC	13.117	2.59096	2.63154e-39	2.27408e-37	0.31219	0.0590661
EC-HEV	ITGB5	13.0974	1.57189	3.40653e-39	2.91948e-37	0.397423	0.143142
EC-HEV	CTTNBP2	12.9599	1.54715	2.06457e-38	1.71965e-36	0.408325	0.159106
EC-HEV	CD53	12.887	2.19454	5.32579e-38	4.34869e-36	0.328048	0.079686
EC-HEV	DPEP1	12.6413	2.18686	1.25011e-36	9.49718e-35	0.332012	0.0895304
EC-HEV	AEBP1	12.4168	1.54101	2.11888e-35	1.52061e-33	0.383548	0.145936
EC-HEV	FAM84A	12.3727	1.28883	3.67423e-35	2.6008e-33	0.419227	0.171079
EC-HEV	ITIH5	12.14	1.57048	6.48394e-34	4.42358e-32	0.412289	0.190502
EC-HEV	SLC44A4	11.8872	1.99209	1.37872e-32	8.992e-31	0.317146	0.0887322
EC-HEV	ISYNA1	11.6942	1.41788	1.36446e-31	8.57543e-30	0.381566	0.155115
EC-HEV	NPW	11.657	2.95614	2.11344e-31	1.32026e-29	0.268583	0.0445657
EC-HEV	SHF	11.4745	1.7035	1.77202e-30	1.05913e-28	0.340932	0.123587
EC-HEV	CDH2	11.4676	2.08017	1.91834e-30	1.14172e-28	0.304262	0.083677
EC-HEV	FOXF1	11.4675	2.04748	1.92121e-30	1.14172e-28	0.303271	0.0827458
EC-tip	RGCC	40.3219	3.42133	0	0	0.859198	0.197641
EC-tip	HOXD10	32.4043	2.66163	2.38553e-230	3.09224e-227	0.719152	0.162942
EC-tip	THY1	30.3111	2.6345	8.19517e-202	6.07028e-199	0.679031	0.15975
EC-tip	BGN	29.2102	3.0729	1.43968e-187	8.29417e-185	0.602574	0.104094
EC-tip	EFEMP1	28.9999	2.91046	6.59703e-185	3.60059e-182	0.643452	0.156142
EC-tip	BASP1	28.7952	2.51716	2.4612e-182	1.27613e-179	0.652536	0.177516
EC-tip	CASC15	28.1112	2.80673	7.14486e-174	3.29299e-171	0.596518	0.121721
EC-tip	FAM84A	27.199	2.66239	6.6769e-163	2.61281e-160	0.592733	0.128522
EC-tip	THBS1	24.5072	2.28518	1.23648e-132	3.56176e-130	0.582135	0.163636
EC-tip	PMEPA1	23.6417	1.93607	1.4354e-123	3.30781e-121	0.598032	0.190285
EC-tip	STXBP6	21.9351	2.29702	1.2015e-106	2.04254e-104	0.495079	0.11381
EC-tip	DYSF	21.8944	1.84202	2.93718e-106	4.95261e-104	0.559425	0.181263
EC-tip	ZNF503	21.7446	1.91399	7.77026e-105	1.24927e-102	0.545799	0.165163
EC-tip	JUP	21.0024	1.75404	6.23431e-98	8.61997e-96	0.546556	0.180014
EC-tip	CEACAM1	20.5074	2.50167	1.84833e-93	2.3518e-91	0.448902	0.0943789
EC-tip	DPEP1	20.27	3.04085	2.36522e-91	2.90264e-89	0.412566	0.0642609
EC-tip	MYO1B	20.1959	1.79996	1.06379e-90	1.27532e-88	0.527631	0.179736
EC-tip	CDH11	19.9804	2.26578	8.15059e-89	9.60473e-87	0.452687	0.104927
EC-tip	ITIH5	19.6659	1.86411	4.22433e-86	4.76155e-84	0.505678	0.163775
EC-tip	FAM129A	19.6575	2.03017	4.98349e-86	5.5869e-84	0.477668	0.141707
EC-tip	SMIM3	19.5535	2.46516	3.85141e-85	4.24884e-83	0.423164	0.0829979
EC-tip	DACH1	19.4997	1.66291	1.10409e-84	1.19889e-82	0.534444	0.19653
EC-tip	ANGPTL2	19.2608	2.52932	1.14661e-82	1.2133e-80	0.420893	0.0916031
EC-tip	MMP2	19.2458	1.78062	1.53185e-82	1.61272e-80	0.489023	0.145871
EC-tip	EDIL3	19.1267	2.38182	1.51384e-81	1.54666e-79	0.423164	0.0920194
EC-tip	ITGA8	18.9296	2.4982	6.50248e-80	6.4527e-78	0.408024	0.0796669
EC-tip	RGL1	18.8477	1.97668	3.06982e-79	3.00321e-77	0.458743	0.131575
EC-tip	PTGFRN	18.8023	2.23418	7.22461e-79	7.03467e-77	0.42165	0.0925746
EC-tip	SLC39A8	18.4805	1.52805	2.96198e-76	2.7797e-74	0.511734	0.181957
EC-tip	TMEM37	17.5712	2.38599	4.09469e-69	3.43821e-67	0.3838	0.0778626
EC-tip	CDH2	17.5304	2.62444	8.39806e-69	6.96703e-67	0.367146	0.0625954
EC-tip	MYO10	17.487	1.68771	1.79912e-68	1.47485e-66	0.464799	0.159334
EC-tip	CGNL1	17.1406	1.43113	7.38473e-66	5.65163e-64	0.495079	0.182373
EC-tip	FOLH1	16.8687	2.38539	7.65065e-64	5.64678e-62	0.364875	0.0699514
EC-tip	SULT1C4	16.8539	1.57293	9.82344e-64	7.19923e-62	0.466313	0.172658
EC-tip	CREB3L2	16.7075	1.41704	1.15652e-62	8.13095e-61	0.489023	0.194726
EC-tip	MIR4435-2HG	16.6918	2.06508	1.50288e-62	1.04949e-60	0.389099	0.097016
EC-tip	RXFP1	16.6539	2.31897	2.83368e-62	1.96557e-60	0.364875	0.0736988
EC-tip	ITGB5	16.588	1.76763	8.50909e-62	5.82437e-60	0.420893	0.127828
EC-tip	KCNC4	16.3501	1.40218	4.34046e-60	2.85782e-58	0.476154	0.182512
EC-tip	SAMD5	16.3393	1.69169	5.18528e-60	3.39251e-58	0.437547	0.157529
EC-tip	FHOD1	16.3156	1.74004	7.64319e-60	4.9849e-58	0.414837	0.126301
EC-tip	ALDH1A1	16.0822	1.50773	3.40166e-58	2.15093e-56	0.433005	0.140874
EC-tip	FAM118A	15.833	1.46303	1.84326e-56	1.1277e-54	0.454958	0.177516
EC-tip	FAP	15.7908	2.3227	3.59839e-56	2.17582e-54	0.344436	0.0689799
EC-tip	PRDM1	15.7411	2.06214	7.89985e-56	4.74907e-54	0.366389	0.0909091
EC-tip	HMCN1	15.7276	1.84337	9.78673e-56	5.86638e-54	0.388342	0.112838
EC-tip	MME	15.6866	2.42707	1.86711e-55	1.10957e-53	0.341408	0.069535
EC-tip	SLC5A3	15.3771	1.55004	2.33105e-53	1.33552e-51	0.429977	0.158779
EC-capillary	SPP1	9.39254	1.87772	5.85712e-21	1.3062e-18	0.360465	0.160883
EC-capillary	HECW2	8.65959	2.18505	4.73467e-18	7.79341e-16	0.276163	0.0834397
EC-capillary	BTNL9	8.45016	3.47814	2.909e-17	4.57066e-15	0.218023	0.024496
EC-capillary	RASGRP3	8.28358	1.32174	1.19523e-16	1.79631e-14	0.351744	0.171727
EC-capillary	FXYD6	7.93806	1.29142	2.05366e-15	2.82072e-13	0.318314	0.13779
EC-capillary	RCAN2	7.82953	3.05562	4.8971e-15	6.38779e-13	0.209302	0.0304925
EC-capillary	ARL15	7.71376	1.1412	1.22161e-14	1.53553e-12	0.361919	0.19431
EC-capillary	FAP	7.11625	1.68139	1.10907e-12	1.07486e-10	0.258721	0.0987497
EC-capillary	KITLG	7.08192	1.4183	1.42174e-12	1.35884e-10	0.311047	0.162286
EC-capillary	TNK2	6.97187	1.92872	3.12751e-12	2.88287e-10	0.225291	0.0654504
EC-capillary	MMP2	6.83758	1.08001	8.05427e-12	7.26285e-10	0.340116	0.186655
EC-capillary	FAM84A	6.70367	1.11085	2.03255e-11	1.76381e-09	0.337209	0.188441
EC-capillary	HBEGF	6.294	1.43174	3.09385e-10	2.33356e-08	0.251453	0.107298
EC-capillary	PRDM1	6.16981	1.34539	6.83742e-10	4.95832e-08	0.260174	0.12248
EC-capillary	ADAMTS6	6.1628	1.03278	7.14687e-10	5.14674e-08	0.305233	0.165221
EC-capillary	ATOH8	6.06024	1.12944	1.35921e-09	9.42812e-08	0.297965	0.1642
EC-capillary	RASGRF2	5.90344	1.31713	3.55998e-09	2.29298e-07	0.239826	0.105894
EC-capillary	TBXA2R	5.73971	1.55181	9.48367e-09	5.81927e-07	0.213663	0.0821638
EC-capillary	SIPA1L2	5.58192	1.70842	2.37872e-08	1.38971e-06	0.202035	0.0770605
EC-capillary	AIF1L	5.42496	0.990492	5.79682e-08	3.13906e-06	0.261628	0.135621
EC-capillary	DLL4	5.4187	0.956496	6.00346e-08	3.22569e-06	0.3125	0.195713
EC-capillary	CA5B	5.30823	1.12162	1.10693e-07	5.58582e-06	0.270349	0.156928
EC-capillary	HLX	5.29873	1.50338	1.16608e-07	5.85582e-06	0.213663	0.0955601
EC-capillary	GPIHBP1	5.23846	1.17931	1.61921e-07	7.95791e-06	0.273256	0.160117
EC-capillary	KIAA1147	5.11529	1.14448	3.13258e-07	1.47658e-05	0.25436	0.142128
EC-capillary	NOV	4.97219	1.30221	6.62023e-07	2.97839e-05	0.223837	0.112656
EC-capillary	EFNB1	4.94807	0.925832	7.49542e-07	3.30053e-05	0.277616	0.169048
EC-capillary	ASS1	4.78629	1.09792	1.69895e-06	6.948e-05	0.225291	0.115846
EC-capillary	DGKD	4.75378	1.68256	1.99645e-06	8.0714e-05	0.170058	0.0620056
EC-capillary	COL21A1	4.61165	0.943696	3.9949e-06	0.000153434	0.247093	0.143404
EC-capillary	HES4	4.55461	1.01838	5.24839e-06	0.000197553	0.219477	0.114315
EC-capillary	WDFY1	4.48628	0.772436	7.24775e-06	0.000263274	0.292151	0.193927
EC-capillary	ACOT7	4.47915	1.25298	7.49416e-06	0.000270311	0.1875	0.0857362
EC-capillary	MSX1	4.47306	1.49072	7.7109e-06	0.000276207	0.174419	0.073233
EC-capillary	GNLY	4.43623	1.18891	9.15467e-06	0.000322574	0.219477	0.119546
EC-capillary	NQO1	4.43609	0.749874	9.16085e-06	0.000322574	0.284884	0.185507
EC-capillary	EXOC3L1	4.26	1.24596	2.04424e-05	0.000672978	0.184593	0.0880327
EC-capillary	SLC16A14	4.25676	0.742319	2.07415e-05	0.000679372	0.271802	0.175555
EC-capillary	EML1	4.23125	0.758427	2.32399e-05	0.000753117	0.284884	0.195458
EC-capillary	LRRC58	4.15447	0.820856	3.26038e-05	0.00102766	0.261628	0.169176
EC-capillary	IGKC	4.02485	1.363	5.7012e-05	0.00170134	0.204942	0.119163
EC-capillary	TNFRSF4	4.00169	1.23176	6.28914e-05	0.00186605	0.184593	0.0947946
EC-capillary	UNC119B	4.00099	0.907132	6.30784e-05	0.00186892	0.215116	0.123628
EC-capillary	CRISPLD1	3.94768	1.76285	7.89127e-05	0.00229867	0.126453	0.0353406
EC-capillary	ZNF366	3.94195	0.770722	8.08213e-05	0.00233966	0.273256	0.18742
EC-capillary	ADAMTSL2	3.94177	2.34011	8.0884e-05	0.00233966	0.116279	0.026027
EC-capillary	UNC5B	3.92659	1.65826	8.61592e-05	0.00247499	0.143895	0.0539678
EC-capillary	ST6GALNAC1	3.90813	1.00598	9.30125e-05	0.00264983	0.19186	0.102832
EC-capillary	HAGLROS	3.89671	1.47798	9.7508e-05	0.00276651	0.149709	0.0611125
EC-capillary	FILIP1	3.85946	0.873676	0.000113639	0.00315934	0.260174	0.180531
EC-capillary	FADS1	3.85311	1.22095	0.000116627	0.00322513	0.170058	0.0812707
EC-capillary	SPRY4	3.82359	1.35575	0.000131524	0.00356111	0.181686	0.0984945
EC-capillary	TNFRSF25	3.79906	1.38182	0.000145243	0.003873	0.161337	0.0761674
EC-capillary	GJA4	3.7942	1.32008	0.000148119	0.00393341	0.143895	0.0560092
EC-aPCV	RHOU	36.6343	2.69651	8.15291e-294	4.97328e-291	0.590124	0.172614
EC-aPCV	SELE	35.8347	4.67865	3.18309e-281	1.50039e-278	0.502968	0.0715768
EC-aPCV	CDKN1A	28.6301	2.50278	2.83998e-180	5.25904e-178	0.490016	0.162656
EC-aPCV	MEOX2	28.0726	2.55327	2.11897e-173	3.72436e-171	0.446303	0.096888
EC-aPCV	SPHK1	27.3073	2.17101	3.4746e-164	5.5863e-162	0.469779	0.133402
EC-aPCV	PCDH19	26.8595	2.80715	6.52792e-159	1.00288e-156	0.414733	0.0829876
EC-aPCV	HLA-DQA1	25.5647	1.76272	3.76664e-144	4.79265e-142	0.496492	0.173029
EC-aPCV	CADM3-AS1	25.3207	1.84316	1.89067e-141	2.29313e-139	0.479493	0.168465
EC-aPCV	ELOVL7	24.4309	2.68895	8.03565e-132	8.81795e-130	0.376147	0.070332
EC-aPCV	ITPKC	23.9194	2.33587	1.92443e-126	2.01579e-124	0.416622	0.139834
EC-aPCV	DOCK11	23.4794	2.55534	6.62356e-122	6.60445e-120	0.368052	0.0746888
EC-aPCV	HLA-DQA2	23.305	3.70123	3.94023e-120	3.83664e-118	0.327037	0.0360996
EC-aPCV	LRRC1	23.0391	1.67898	1.89165e-117	1.79146e-115	0.466271	0.199585
EC-aPCV	ADAMTS4	22.947	3.4002	1.57879e-116	1.47496e-114	0.347545	0.0705394
EC-aPCV	TACR1	22.5782	2.2202	7.0959e-113	6.28927e-111	0.384781	0.104357
EC-aPCV	SLC25A25	21.6815	2.13696	3.0648e-104	2.46372e-102	0.409606	0.175104
EC-aPCV	C7	21.1712	1.4191	1.76009e-99	1.32262e-97	0.459525	0.180083
EC-aPCV	AOC3	20.7256	2.30012	2.03548e-95	1.47608e-93	0.348084	0.0931535
EC-aPCV	PERP	20.6875	1.39786	4.48546e-95	3.21898e-93	0.450351	0.187344
EC-aPCV	CYSLTR1	20.0473	1.90983	2.12932e-89	1.44794e-87	0.376956	0.138174
EC-aPCV	ARID5A	19.1704	1.63473	6.54467e-82	4.05184e-80	0.411765	0.19751
EC-aPCV	AKAP12	19.0811	1.70397	3.62823e-81	2.21322e-79	0.398813	0.169295
EC-aPCV	MIR22HG	18.9815	1.78076	2.42598e-80	1.45419e-78	0.383162	0.168257
EC-aPCV	ATF3	18.9238	2.25019	7.25632e-80	4.31221e-78	0.32191	0.0875519
EC-aPCV	RGS16	18.2401	2.46179	2.47797e-74	1.31777e-72	0.324609	0.108921
EC-aPCV	IL6	18.1407	2.76575	1.51961e-73	8.01953e-72	0.281166	0.0553942
EC-aPCV	MLPH	18.043	2.44752	8.95675e-73	4.64407e-71	0.285213	0.0589212
EC-aPCV	SNAI1	17.5965	2.34901	2.61904e-69	1.30574e-67	0.303292	0.0925311
EC-aPCV	TRIB1	17.3906	1.76565	9.71977e-68	4.75444e-66	0.362385	0.167842
EC-aPCV	EBF3	17.1484	2.12414	6.45918e-66	3.1082e-64	0.29007	0.0751037
EC-aPCV	EPS8	17.1054	1.31348	1.35258e-65	6.44887e-64	0.388559	0.177593
EC-aPCV	MTRNR2L1	16.4681	2.12032	6.22243e-61	2.75167e-59	0.279547	0.0728216
EC-PCV	CPE	40.2489	4.18855	0	0	0.927725	0.193179
EC-PCV	PTGIS	22.9049	2.69413	4.15168e-116	9.56731e-113	0.606635	0.153996
EC-PCV	RYR3	21.4264	2.49767	7.5872e-102	1.31132e-98	0.580569	0.148008
EC-PCV	RSPO3	20.6819	3.17331	5.04616e-95	7.47553e-92	0.511848	0.0959386
EC-PCV	PLCXD3	18.3104	2.63064	6.84247e-75	5.25603e-72	0.483412	0.113382
EC-PCV	MIR99AHG	15.2272	2.09193	2.33483e-52	9.49499e-50	0.443128	0.136813
EC-PCV	PLAC9	13.4371	1.76072	3.66619e-41	8.94552e-39	0.432464	0.162197
EC-PCV	ADGRG6	12.7128	1.54072	5.02259e-37	9.46986e-35	0.447867	0.199948
EC-PCV	SEMA3E	12.6931	1.99847	6.45496e-37	1.19532e-34	0.374408	0.115595
EC-PCV	CRHBP	10.8616	1.91865	1.75555e-27	2.09254e-25	0.332938	0.113642
EC-PCV	SEMA3D	10.4309	2.27081	1.79188e-25	1.91565e-23	0.270142	0.0494663
EC-PCV	RAB3C	9.8007	1.78877	1.11804e-22	1.03983e-20	0.308057	0.110388
EC-PCV	RARRES1	9.35193	1.88005	8.60637e-21	7.1114e-19	0.2891	0.100495
EC-PCV	SRPX	8.72459	2.43631	2.67139e-18	1.81061e-16	0.233412	0.053762
EC-PCV	RAB11FIP1	8.69068	1.28314	3.60282e-18	2.39495e-16	0.332938	0.157902
EC-PCV	LDLRAD3	8.29977	2.14974	1.04316e-16	6.28929e-15	0.242891	0.0762822
EC-PCV	HLA-DOA	8.25483	1.44431	1.52116e-16	9.01398e-15	0.292654	0.12692
EC-PCV	NTN4	8.22466	1.20002	1.95747e-16	1.15008e-14	0.347156	0.189404
EC-PCV	AC055874.1	7.95152	2.50248	1.84235e-15	1.00554e-13	0.204976	0.0391825
EC-PCV	DAPK1	7.82992	1.62721	4.88193e-15	2.60957e-13	0.259479	0.102838
EC-PCV	SCARA3	7.82892	1.45298	4.92069e-15	2.62353e-13	0.276066	0.117548
EC-PCV	BMP4	7.20261	1.32262	5.90705e-13	2.79708e-11	0.268957	0.121713
EC-PCV	CDH23	7.11621	2.30496	1.10935e-12	5.12425e-11	0.193128	0.0458214
EC-PCV	ROBO1	6.76981	1.67618	1.28948e-11	5.31687e-10	0.227488	0.091773
EC-PCV	AK4	6.73062	1.28647	1.68936e-11	6.85663e-10	0.259479	0.125098
EC-PCV	FAM155A	6.67583	1.55272	2.45831e-11	9.82377e-10	0.222749	0.0853944
EC-artery	CXCL12	33.8462	5.95573	4.12768e-251	4.2804e-247	0.867925	0.095304
EC-artery	SEMA3G	30.3823	8.44792	9.39808e-203	2.43645e-199	0.756432	0.00616895
EC-artery	TSPAN2	28.3352	5.16337	1.27409e-176	1.65154e-173	0.730703	0.0626967
EC-artery	LTBP4	28.0548	4.12892	3.49016e-173	3.80979e-170	0.761578	0.160267
EC-artery	HEY1	26.2111	6.94416	1.98492e-151	1.37224e-148	0.658662	0.0154853
EC-artery	SERPINE2	23.8863	7.40344	4.2518e-126	1.83713e-123	0.598628	0.0141005
EC-artery	ARL15	23.7606	3.4057	8.5315e-125	3.61109e-122	0.679245	0.173234
EC-artery	IGFBP3	23.5981	5.09666	4.02985e-123	1.60729e-120	0.624357	0.0694952
EC-artery	GJA4	23.4555	5.63447	1.16033e-121	4.5406e-119	0.600343	0.0236686
EC-artery	VEGFC	23.2499	3.34469	1.42545e-119	5.27924e-117	0.670669	0.169961
EC-artery	ANXA3	22.3107	5.17715	2.91044e-110	8.87684e-108	0.576329	0.0397835
EC-artery	SULF1	22.2828	4.19863	5.43162e-110	1.60931e-107	0.607204	0.0983256
EC-artery	GJA5	21.8631	8.07787	5.84087e-106	1.57324e-103	0.545455	0.00591716
EC-artery	EMP3	20.1155	3.011	5.39692e-90	1.13063e-87	0.605489	0.180788
EC-artery	IL32	20.0332	2.9815	2.82913e-89	5.69671e-87	0.610635	0.159134
EC-artery	COBLL1	19.8956	2.88327	4.44586e-88	8.86606e-86	0.605489	0.160393
EC-artery	ADAMTS6	19.6965	3.36197	2.31137e-86	4.39797e-84	0.584906	0.146544
EC-artery	ASS1	19.6764	3.61975	3.4333e-86	6.47333e-84	0.548885	0.0935415
EC-artery	HES4	19.3417	3.50426	2.39497e-83	4.1051e-81	0.54717	0.091653
EC-artery	PCSK5	19.3352	4.88301	2.7145e-83	4.61465e-81	0.509434	0.0483445
EC-artery	PPP1R14A	18.9254	5.81884	7.04118e-80	1.11476e-77	0.483705	0.0219061
EC-artery	TMEM47	18.7903	3.08077	9.06495e-79	1.39264e-76	0.554031	0.123127
EC-artery	AIF1L	18.7273	3.15947	2.9654e-78	4.36187e-76	0.54717	0.116329
EC-artery	PDGFD	18.6931	3.25392	5.63007e-78	8.16557e-76	0.545455	0.125897
EC-artery	GUCY1A1	18.3058	4.36718	7.43306e-75	1.01422e-72	0.490566	0.0523732
EC-artery	NEBL	17.7837	5.63042	9.45328e-71	1.16012e-68	0.456261	0.0234168
EC-artery	BMX	17.7098	3.04571	3.52478e-70	4.27508e-68	0.530017	0.130933
EC-artery	SYT1	17.2256	3.80657	1.70552e-66	1.95429e-64	0.478559	0.068488
EC-artery	PLLP	16.9619	3.45991	1.57222e-64	1.7162e-62	0.483705	0.0934156
EC-artery	CDH13	16.6888	3.75094	1.5814e-62	1.63992e-60	0.463122	0.0633262
EC-artery	FBLN5	16.6152	6.26185	5.41267e-62	5.52999e-60	0.42024	0.0110789
EC-artery	TMEM178A	16.5801	7.77715	9.70846e-62	9.87026e-60	0.413379	0.00314743
EC-artery	TM6SF1	16.1654	3.25924	8.84509e-59	8.49292e-57	0.466552	0.0893869
EC-artery	CLIC5	15.8981	6.06573	6.53313e-57	5.96904e-55	0.403087	0.0118343
EC-artery	TAGLN	15.7158	3.39957	1.17852e-55	1.05356e-53	0.483705	0.137228
EC-artery	FBLIM1	15.5883	2.97745	8.747e-55	7.62239e-53	0.492281	0.164673
EC-artery	LINC00982	15.1581	8.1293	6.70238e-52	5.53814e-50	0.377358	0.00201435
EC-artery	ATP2A3	14.5537	4.63271	5.53016e-48	4.29571e-46	0.38422	0.0298376
EC-artery	PALLD	13.9255	3.41097	4.4343e-44	3.12814e-42	0.403087	0.0752864
EC-artery	COL8A1	13.5075	5.52955	1.41276e-41	9.51317e-40	0.346484	0.01473
EC-artery	SPECC1	13.3895	4.42933	6.96529e-41	4.60064e-39	0.356775	0.0313484
EC-artery	FHL1	13.3514	2.51221	1.16264e-40	7.65498e-39	0.432247	0.130052
EC-artery	ABI3BP	12.9861	2.77195	1.46713e-38	9.13763e-37	0.41681	0.116581
EC-artery	MAP1B	12.971	2.21849	1.78776e-38	1.10681e-36	0.466552	0.181921
EC-artery	FUT8	12.6691	2.77483	8.7662e-37	5.28521e-35	0.403087	0.118721
EC-artery	TP53I11	12.4918	2.918	8.27284e-36	4.84686e-34	0.377358	0.0820849
EC-artery	RNF144B	12.119	2.35429	8.37704e-34	4.6579e-32	0.421955	0.163288
EC-artery	ATP13A3	12.0583	2.62787	1.75376e-33	9.62247e-32	0.411664	0.153468
EC-artery	FILIP1	11.6506	1.85467	2.27885e-31	1.1757e-29	0.440823	0.168324
EC-artery	CD58	11.5996	2.05019	4.13776e-31	2.11894e-29	0.427101	0.181418
EC-artery	THSD4	11.4826	3.81013	1.61346e-30	8.12211e-29	0.320755	0.0430568
EC-artery	ADRA2C	11.2854	4.02347	1.54895e-29	7.59462e-28	0.305317	0.0300894
EC-artery	FGF2	11.1405	2.42946	7.96982e-29	3.78247e-27	0.367067	0.106509
EC-artery	TMEM100	10.9978	4.69929	3.91607e-28	1.80087e-26	0.286449	0.0146041
EC-artery	SYNJ2	10.873	2.68931	1.5502e-27	6.9894e-26	0.35506	0.108397
EC-artery	SYT11	10.7263	2.13016	7.66366e-27	3.38179e-25	0.389365	0.157749
EC-artery	SSTR1	10.6933	5.31147	1.09446e-26	4.78886e-25	0.274443	0.0105753
EC-artery	AC004947.1	10.5294	6.8863	6.32134e-26	2.70877e-24	0.264151	0.00377691
EC-artery	FLNC	10.5002	2.4949	8.6182e-26	3.66274e-24	0.339623	0.0897646
EC-artery	CX3CL1	10.499	2.18298	8.72711e-26	3.70144e-24	0.406518	0.187083
EC-artery	PRKX	10.4334	2.25463	1.74567e-25	7.31417e-24	0.367067	0.133451
EC-artery	NKAIN2	10.0062	7.20164	1.43147e-23	5.48776e-22	0.250429	0.00289563
EC-artery	AC004540.2	9.93096	1.92335	3.05305e-23	1.15759e-21	0.363636	0.130933
EC-artery	CEBPB	9.83619	2.18948	7.86357e-23	2.93328e-21	0.353345	0.132821
